# Supplementary material for: An efficient one pot transfer hydrogenation and N-alkylation of quinolines with alcohols mediated by Pd/C/Zn
Source: Royal Society of Chemistry journal article supplement (doi:10.1039/c1ob05888f), 2011-10-12
Supplement: c1ob05888f.pdf [file c1ob05888f.pdf]

## Electronic Supplementary Information

### An efficient one pot transfer hydrogenation and N-alkylation of quinolines with alcohols mediated by Pd/C/Zn.

Belén Abarca,\* Rosa Adam and Rafael Ballesteros\*

#### Index

|                                                                               |    |
|-------------------------------------------------------------------------------|----|
| 1. Evidences of known compounds.....                                          | 2  |
| 2. Spectra of known compounds.....                                            | 5  |
| 3. Spectra of new compounds.....                                              | 20 |
| 4. Spectra of acetone detection experience.....                               | 45 |
| 5. Spectra of 2-propanol-2-d <sub>1</sub> and 2-propan(ol-d) experiences..... | 51 |
| 6. References.....                                                            | 55 |

## 1. Evidences of known compounds.

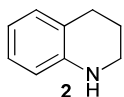

**1,2,3,4-Tetrahydroquinoline.** Yellow oil. *R<sub>f</sub>* 0.50 (hexane–ethyl acetate, 1 : 1). IR (neat) 3196, 3134, 2916, 2849, 1679, 1589, 1486, 1384, 1281, 819, 742  $\text{cm}^{-1}$ .  $^1\text{H}$  NMR ( $\text{CDCl}_3$ , 300 MHz):  $\delta$  6.96 (2H, m), 6.62 (1H, ddd,  $J = 7.4, 7.4, 1.2$  Hz), 6.5 (1H, d,  $J = 8.4$  Hz), 3.81 (1H, br, NH), 3.31 (2H, t,  $J = 5.5$  Hz), 2.77 (2H, t,  $J = 6.4$  Hz), 1.95 (2H, m).  $^{13}\text{C}$  NMR (75 MHz,  $\text{CDCl}_3$ )  $\delta$  142.6, 127.3, 124.5, 119.2, 114.7, 112.0, 39.8, 24.8, 20.0. Lit.<sup>1</sup>

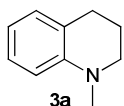

**1-Methyl-1,2,3,4-tetrahydroquinoline.** Yellow oil. *R<sub>f</sub>* 0.78 (hexane–ethyl acetate, 1 : 1). IR (neat) 2926, 2856, 1602, 1506, 1223, 1058, 723  $\text{cm}^{-1}$ .  $^1\text{H}$  NMR ( $\text{CDCl}_3$ , 300 MHz):  $\delta$  7.13 (1H, dd,  $J = 7.5, 7.5$  Hz), 7.00 (1H, d,  $J = 7.1$  Hz), 6.66 (2H, m), 3.28 (2H, t,  $J = 5.6$  Hz), 2.94 (3H, s), 2.81 (2H, t,  $J = 6.4$  Hz), 2.04 (2H, m).  $^{13}\text{C}$  NMR (75 MHz,  $\text{CDCl}_3$ )  $\delta$  146.2, 128.6, 126.5, 122.2, 115.5, 110.3, 50.5, 38.4, 27.1, 21.7. Lit.<sup>2</sup>

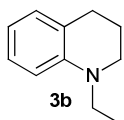

**1-Ethyl-1,2,3,4-tetrahydroquinoline.** Yellow oil. *R<sub>f</sub>* 0.80 (hexane–ethyl acetate, 1 : 1). IR (neat) 2921, 2841, 1607, 1499, 1371, 1248, 1086, 758  $\text{cm}^{-1}$ .  $^1\text{H}$  NMR ( $\text{CDCl}_3$ , 300 MHz):  $\delta$  7.04 (1H, dd,  $J = 7.6, 7.6$  Hz), 6.93 (1H, d,  $J = 7.6$  Hz), 6.57 (2H, m,  $J = 7.6$  Hz), 3.34 (2H, q,  $J = 7.2$  Hz), 3.26 (2H, t,  $J = 6.2$  Hz), 2.75 (2H, t,  $J = 6.2$  Hz), 1.96 (m, 2H), 1.13 (2H, t,  $J = 7.2$  Hz).  $^{13}\text{C}$  NMR (75 MHz,  $\text{CDCl}_3$ )  $\delta$  142.9, 127.0, 124.9, 120.3, 113.3, 108.4, 46.3, 43.2, 26.1, 20.2, 10.7. Lit.<sup>1</sup>

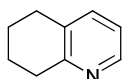

**5,6,7,8-Tetrahydroquinoline.** Yellow oil. *R<sub>f</sub>* 0.63 (hexane–ethyl acetate, 1 : 1). IR (neat) 2921, 2847, 1602, 1453, 740, 696  $\text{cm}^{-1}$ .  $^1\text{H}$  NMR ( $\text{CDCl}_3$ , 300 MHz):  $\delta$  8.33 (1H, d,  $J = 4.1$  Hz), 7.33 (1H, d,  $J = 7.3$  Hz), 7.01 (1H, d,  $J = 7.3, 4.1$  Hz), 2.92 (3H, t,  $J = 6.2$  Hz), 2.76 (2H, t,  $J = 6.3$  Hz), 7.33 (1H, d,  $J = 7.3$  Hz), 1.85 (4H, m). HRMS found for  $[\text{M}+\text{H}]^+$  134.0970;  $\text{C}_9\text{H}_{12}\text{N}$  requires 134.0970. Lit.<sup>3</sup>

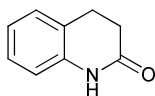

**3,4-Dihydroquinolin-2(1H)-one.** Yellow oil. *R<sub>f</sub>* 0.49 (hexane–ethyl acetate, 1 : 1). IR (neat) 3185, 3080, 2906, 1699, 1587, 1379, 1196, 824, 742  $\text{cm}^{-1}$ .  $^1\text{H}$  NMR ( $\text{CDCl}_3$ , 300

MHz):  $\delta$  7.92 (1H, br, NH), 7.18 (2H, m), 6.99 (2H, ddd,  $J = 7.5, 7.5, 1.1$  Hz), 6.74 (1H, dd,  $J = 7.7, 1.4$  Hz), 2.98 (2H, t,  $J = 7.1$  Hz), 2.64 (2H, t,  $J = 7.3$  Hz).  $^{13}\text{C}$  NMR (75 MHz,  $\text{CDCl}_3$ )  $\delta$  171.6, 137.8, 128.3, 126.9, 124.0, 123.5, 116.0, 31.2, 25.6. Lit.<sup>4</sup>

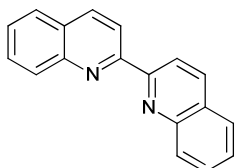

**2, 2'-Biquinoline.** Yellow solid, mp: 193-196 °C.  $R_f$  0.80 (hexane–ethyl acetate, 1 : 1). IR (neat) 2911, 2847, 1671, 1597, 1492, 1384, 1276, 740  $\text{cm}^{-1}$ .  $^1\text{H}$  NMR (300 MHz,  $\text{CDCl}_3$ )  $\delta$  8.86 (2H, d,  $J = 8.6$  Hz), 8.34 (2H, d,  $J = 8.6$  Hz), 8.24 (2H, d,  $J = 8.6$  Hz), 7.90 (2H, d,  $J = 8.4$  Hz), 7.76 (2H, ddd,  $J = 8.4, 6.9, 1.5$  Hz), 7.58 (2H, ddd,  $J = 8.1, 6.9, 1.2$  Hz). Lit.<sup>5</sup>

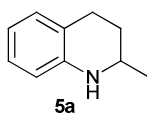

**2-Methyl-1,2,3,4-tetrahydroquinoline.** Yellow oil.  $R_f$  0.89 (hexane–ethyl acetate, 1 : 1). IR (neat) 3394, 2968, 2924, 2849, 1605, 1587, 1490, 1309, 728  $\text{cm}^{-1}$ .  $^1\text{H}$  NMR (300 MHz,  $\text{CDCl}_3$ )  $\delta$  6.96 (2H, m), 6.60 (1H, ddd,  $J = 7.4, 7.4, 1.1$  Hz), 6.47 (1H, dd,  $J = 8.1, 1.2$  Hz), 3.69 (1H, br), 3.40 (1H, m), 2.79 (2H, m), 1.93 (1H, m), 1.59 (1H, m), 1.20 (3H, d,  $J = 6.3$  Hz). HRMS found for  $[\text{M}+\text{H}]^+$  148.1128;  $\text{C}_{10}\text{H}_{14}\text{N}$  requires 148.1126. Lit.<sup>6</sup>

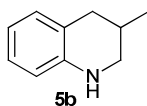

**3-Methyl-1,2,3,4-tetrahydroquinoline.** Yellow oil.  $R_f$  0.67 (hexane–ethyl acetate, 1 : 1). IR (neat) 3512, 2982, 2926, 2852, 1598, 1230, 1052, 736  $\text{cm}^{-1}$ .  $^1\text{H}$  NMR (300 MHz,  $\text{CDCl}_3$ )  $\delta$  6.98 (2H, m), 6.63 (1H, ddd,  $J = 7.4, 7.4, 1.2$  Hz), 6.50 (1H, d,  $J = 7.9$  Hz), 3.66 (1H, br), 3.28 (1H, m), 2.91 (1H, t,  $J = 9.7$  Hz), 2.80 (1H, m), 2.45 (1H, m), 2.07 (1H, m), 1.07 (3H, d,  $J = 6.6$  Hz). HRMS found for  $[\text{M}+\text{H}]^+$  148.1128;  $\text{C}_{10}\text{H}_{14}\text{N}$  requires 148.1126. Lit.<sup>6</sup>

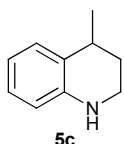

**4-Methyl-1,2,3,4-tetrahydroquinoline.** Yellow oil.  $R_f$  0.74 (hexane–ethyl acetate, 1 : 1). IR (neat) 3676, 2991, 2916, 2842, 1610, 1078, 1079, 756, 673  $\text{cm}^{-1}$ .  $^1\text{H}$  NMR (300 MHz,  $\text{CDCl}_3$ )  $\delta$  7.08 (1H, dd,  $J = 7.6$  Hz), 6.99 (1H, ddd,  $J = 7.7, 7.5, 1.5$  Hz), 6.66 (1H, ddd,  $J = 7.4, 7.4, 1.2$  Hz), 6.50 (1H, dd,  $J = 8.0, 1.2$  Hz), 3.59 (1H, br, NH), 3.32 (2H, m), 2.94 (1H, m), 2.01 (1H, m), 1.70 (1H, m), 1.32 (3H, d,  $J = 7.0$  Hz). HRMS found for  $[\text{M}+\text{H}]^+$  148.1128;  $\text{C}_{10}\text{H}_{14}\text{N}$  requires 148.1126. Lit.<sup>7</sup>

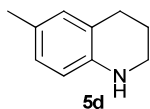

**6-Methyl-1,2,3,4-tetrahydroquinoline.** Yellow oil. *R<sub>f</sub>* 0.57 (hexane–ethyl acetate, 1 : 1). IR (neat) 3420, 2911, 2845, 1656, 1599, 1502, 1359, 1302, 1069, 804  $\text{cm}^{-1}$ .  $^1\text{H}$  NMR (300 MHz,  $\text{CDCl}_3$ )  $\delta$  6.78 (2H, m), 6.43 (1H, d,  $J = 8.6$  Hz), 3.28 (2H, t,  $J = 5.5$  Hz), 3.15 (1H, br, NH), 2.74 (2H, t,  $J = 6.4$  Hz), 2.21 (3H, s), 1.94 (2H, m). HRMS found for  $[\text{M}+\text{H}]^+$  148.1129;  $\text{C}_{10}\text{H}_{14}\text{N}$  requires 148.1126. Lit.<sup>7</sup>

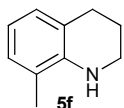

**8-Methyl-1,2,3,4-tetrahydroquinoline.** Yellow oil. *R<sub>f</sub>* 0.70 (hexane–ethyl acetate, 1 : 1). IR (neat) 3421, 2916, 2847, 1597, 1504, 1463, 1299, 1236, 1104, 1042, 758, 727  $\text{cm}^{-1}$ .  $^1\text{H}$  NMR (300 MHz,  $\text{CDCl}_3$ )  $\delta$  6.94 (2H, m), 6.64 (1H, dd,  $J = 7.4$  Hz), 3.56 (1H, br, NH), 3.43 (2H, t,  $J = 5.5$  Hz), 2.86 (2H, t,  $J = 6.4$  Hz), 2.15 (3H, s), 2.01 (2H, m). HRMS found for  $[\text{M}+\text{H}]^+$  148.1128;  $\text{C}_{10}\text{H}_{14}\text{N}$  requires 148.1126. Lit.<sup>7</sup>

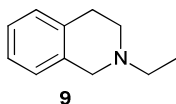

**2-Ethyl-1,2,3,4-tetrahydroisoquinoline.** Yellow oil. *R<sub>f</sub>* 0.62 (hexane–ethyl acetate, 1 : 1). IR (neat) 2921, 2852, 1589, 1379, 1276, 1189, 1150, 735  $\text{cm}^{-1}$ .  $^1\text{H}$  NMR (300 MHz,  $\text{CDCl}_3$ )  $\delta$  7.10 (3H, m), 7.02 (1H, m), 3.63 (2H, s), 2.92 (2H, t,  $J = 5.9$  Hz), 2.74 (2H, t,  $J = 5.9$  Hz), 2.59 (2H, q,  $J = 7.2$  Hz), 1.19 (3H, t,  $J = 7.2$  Hz).  $^{13}\text{C}$  NMR (75 MHz,  $\text{CDCl}_3$ )  $\delta$  132.2, 127.6, 126.2, 125.8, 124.8, 54.5, 51.2, 50.9, 28.0, 12.2. Lit.<sup>8</sup>

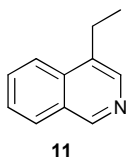

**4-Ethylisoquinoline.** Yellow oil. *R<sub>f</sub>* 0.71 (hexane–ethyl acetate, 1 : 1). IR (neat) 3100, 1582, 1439, 1232, 727  $\text{cm}^{-1}$ .  $^1\text{H}$  NMR (300 MHz,  $\text{CDCl}_3$ )  $\delta$  9.11 (s, 1H), 8.38 (s, 1H), 8.00 (1H, d,  $J = 8.2$  Hz), 7.98 (1H, d,  $J = 8.2$  Hz), 7.71 (1H, ddd,  $J = 8.2, 8.2, 1.3$  Hz, 1H), 7.59 (1H, dd,  $J = 8.2, 8.2$  Hz), 3.06 (2H, q,  $J = 7.5$  Hz), 1.38 (3H, t,  $J = 7.5$  Hz). MS (E.I.):  $m/z$  (%) 157 (80.3); 142 (100); 128 (10.6); 115 (34.8); 89 (6.0). Lit.<sup>9</sup>

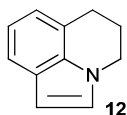

**5,6-Dihydro-4H-pyrrolo[3,2,1-ij]quinoline.** Yellow oil. *R<sub>f</sub>* 0.87 (hexane–ethyl acetate, 1 : 1). IR (neat) 2921, 2849, 1461, 1381, 1261, 1071, 801, 724  $\text{cm}^{-1}$ .  $^1\text{H}$  NMR (300 MHz,  $\text{CDCl}_3$ )  $\delta$  7.37 (1H, dd,  $J = 7.9, 0.8$  Hz), 7.00 (1H, d,  $J = 3.0$  Hz), 6.94 (1H, dd,  $J = 7.1, 7.1$  Hz), 6.84 (1H, dd,  $J = 7.0, 0.9$  Hz), 6.37 (1H, d,  $J = 3.0$  Hz), 4.09 (2H, t,  $J = 5.7$  Hz), 2.93 (2H, t,  $J = 6.1$  Hz), 2.17 (2H, m).  $^{13}\text{C}$  NMR (75 MHz,  $\text{CDCl}_3$ )  $\delta$  134.2, 126.0, 125.9, 121.7, 119.6, 118.3, 118.1, 100.4, 44.2, 24.8, 23.0. Lit.<sup>10</sup>

## 2. Spectra of known compounds.

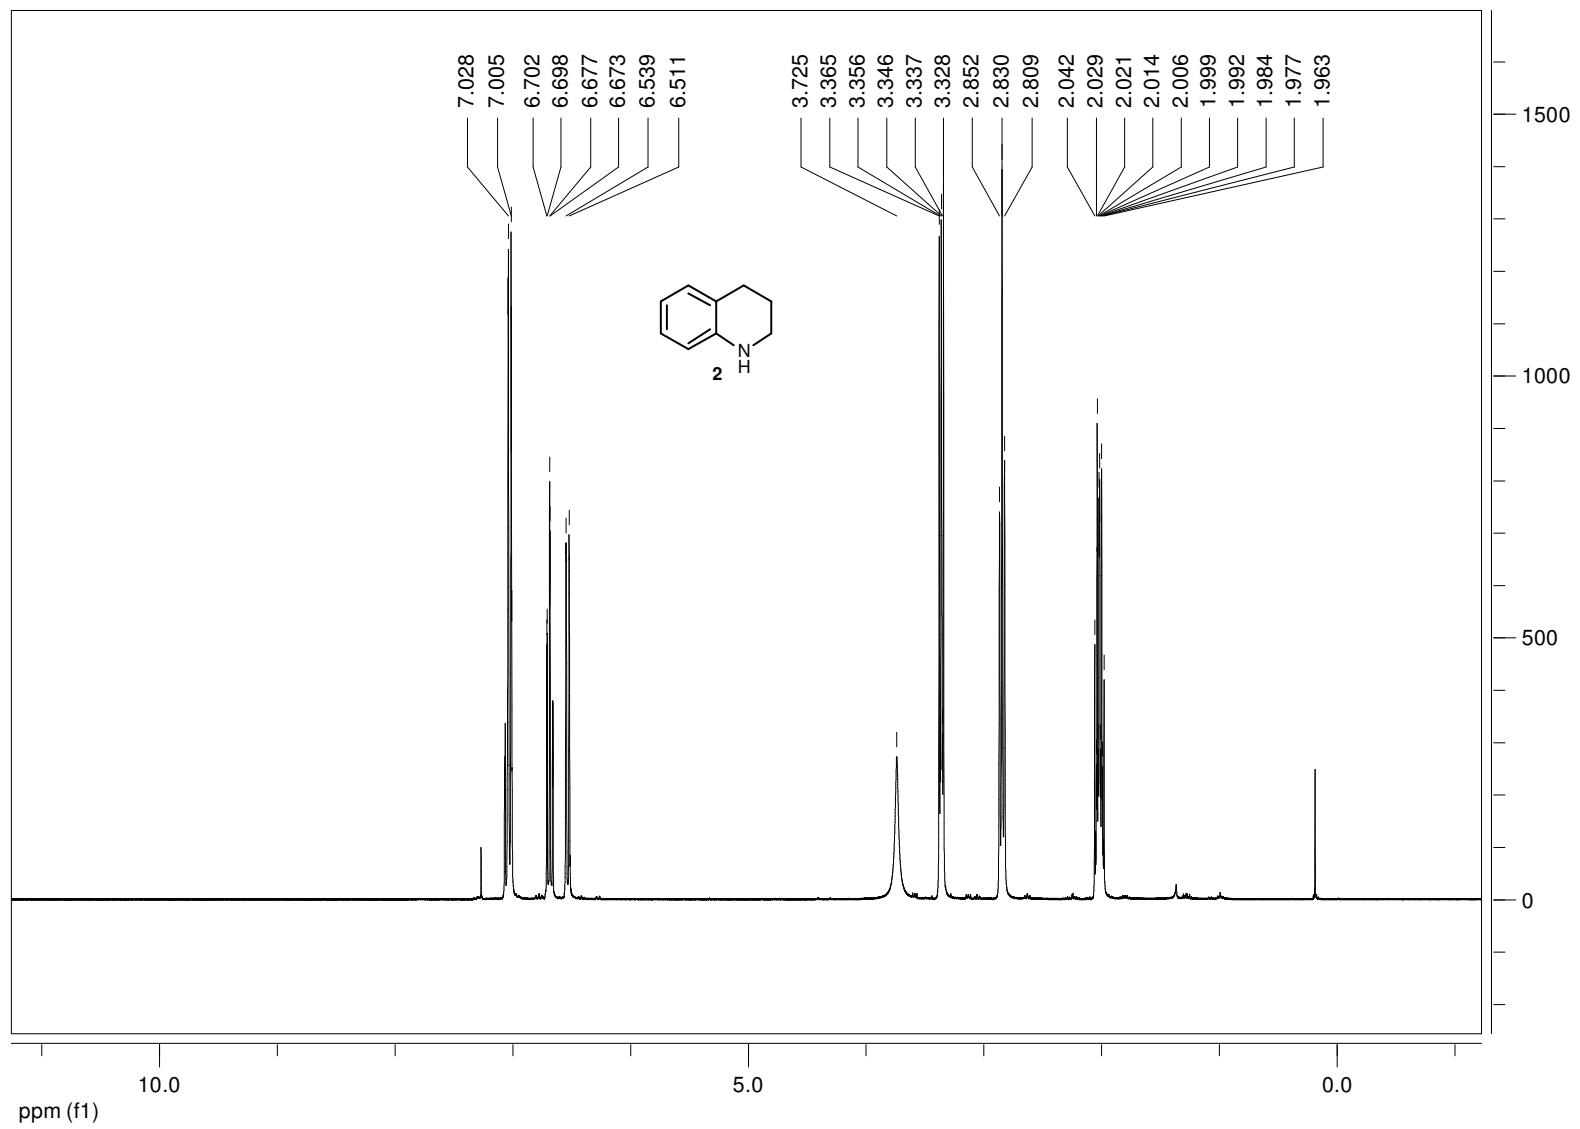

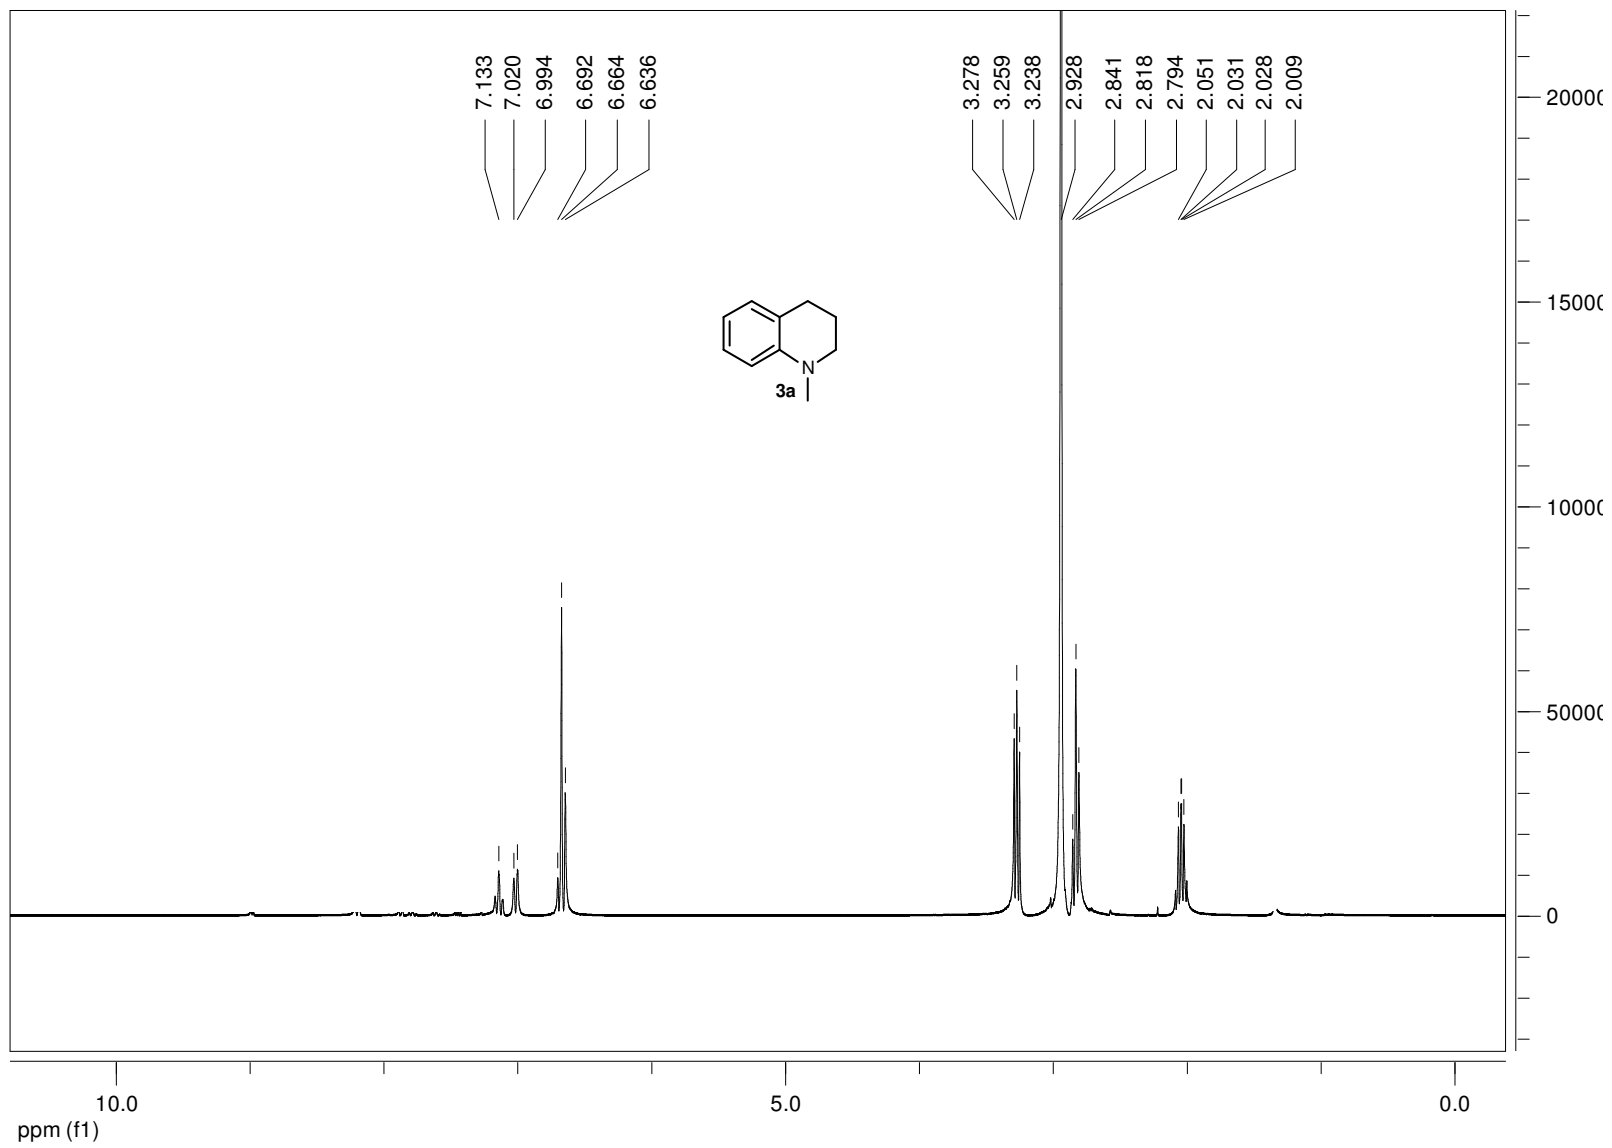

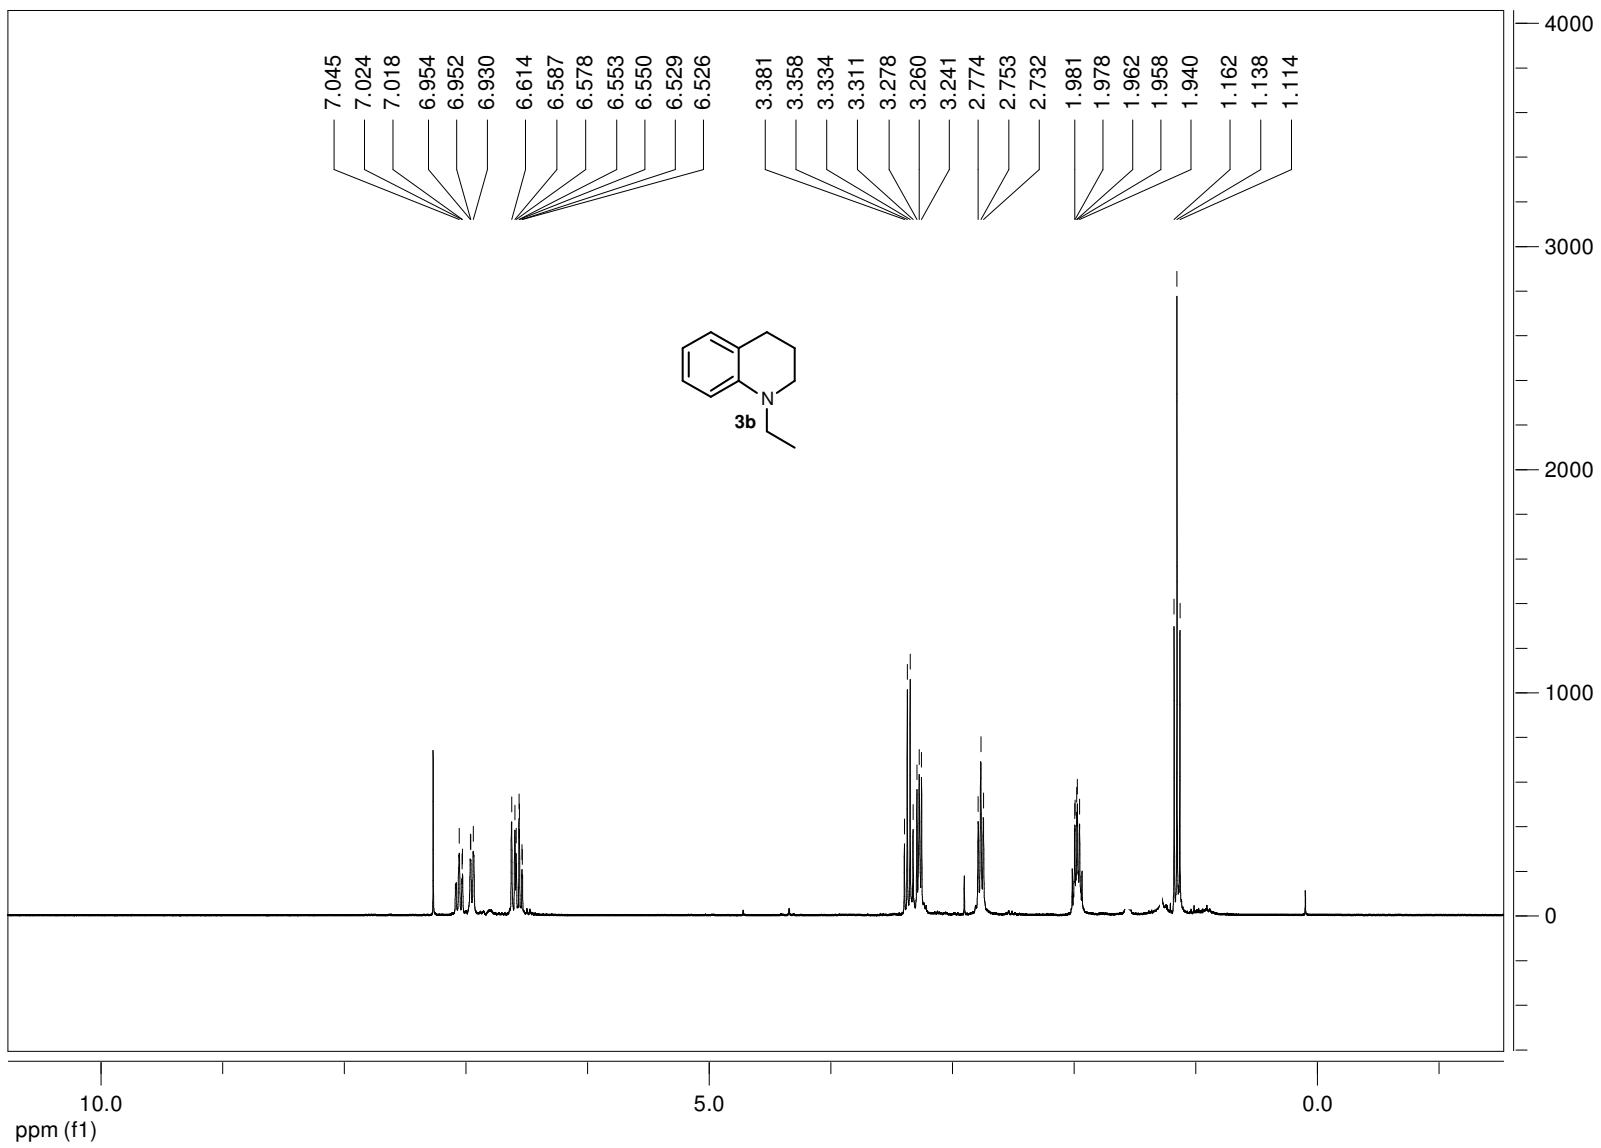



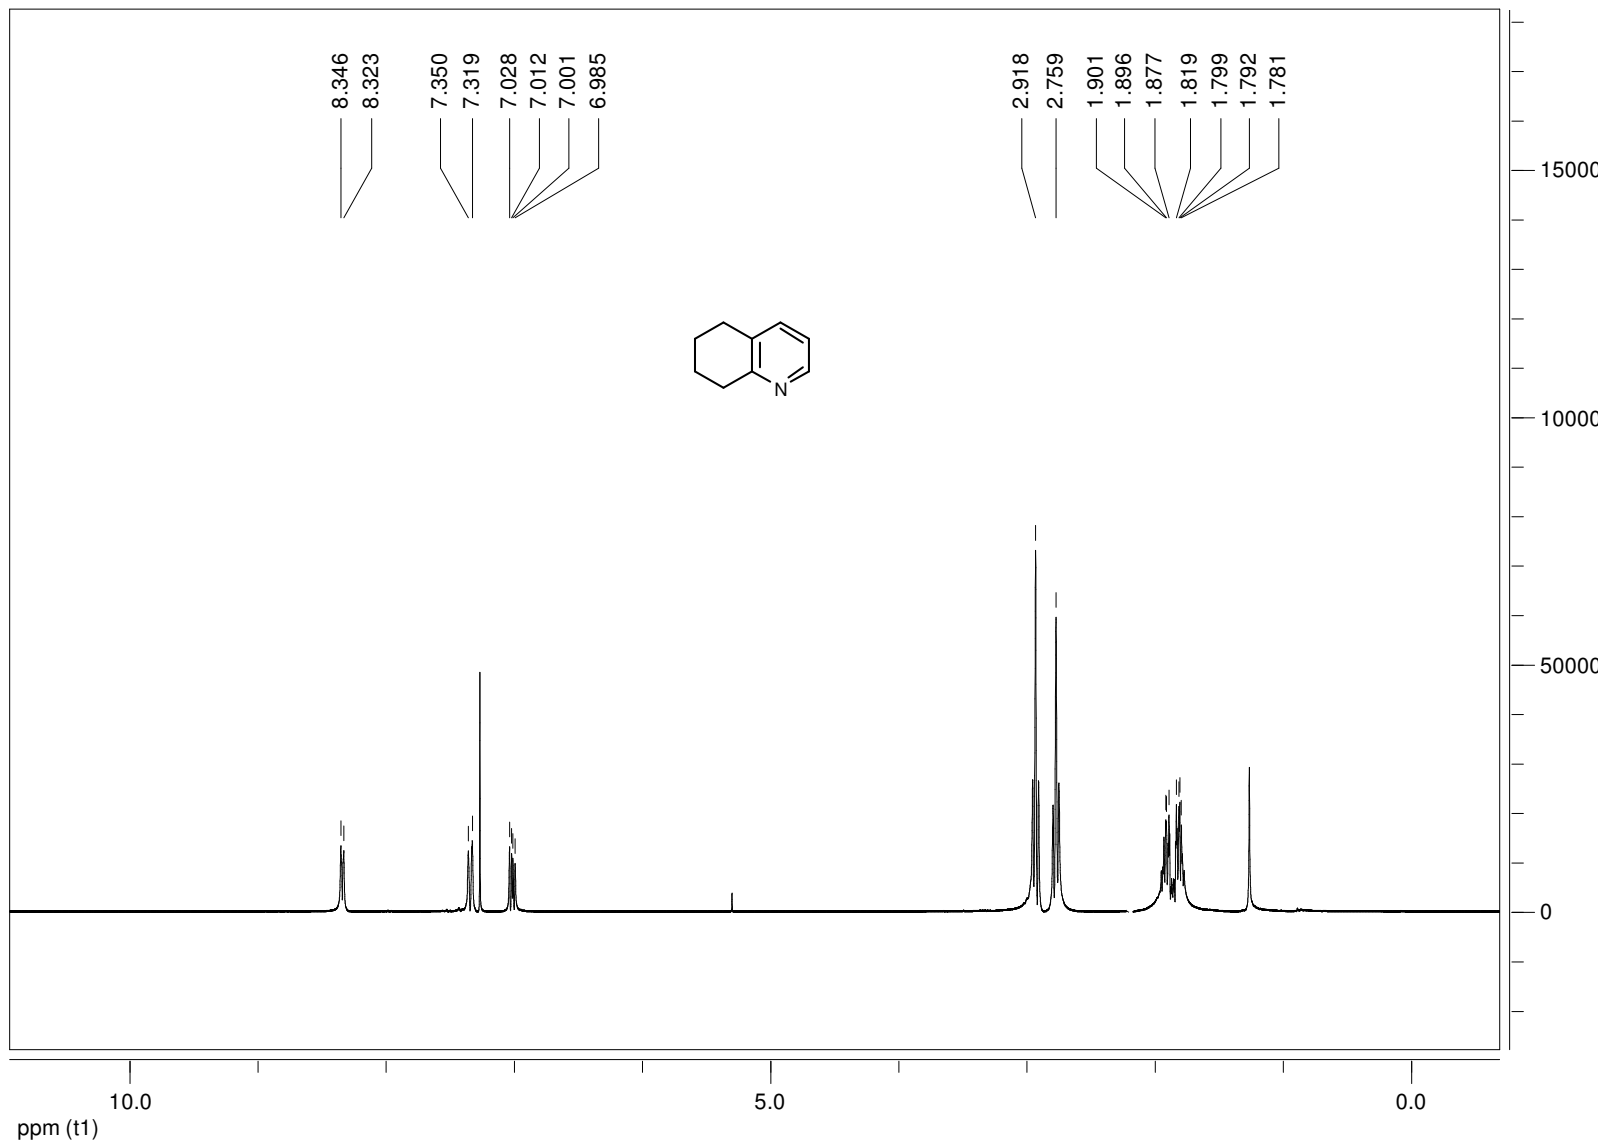

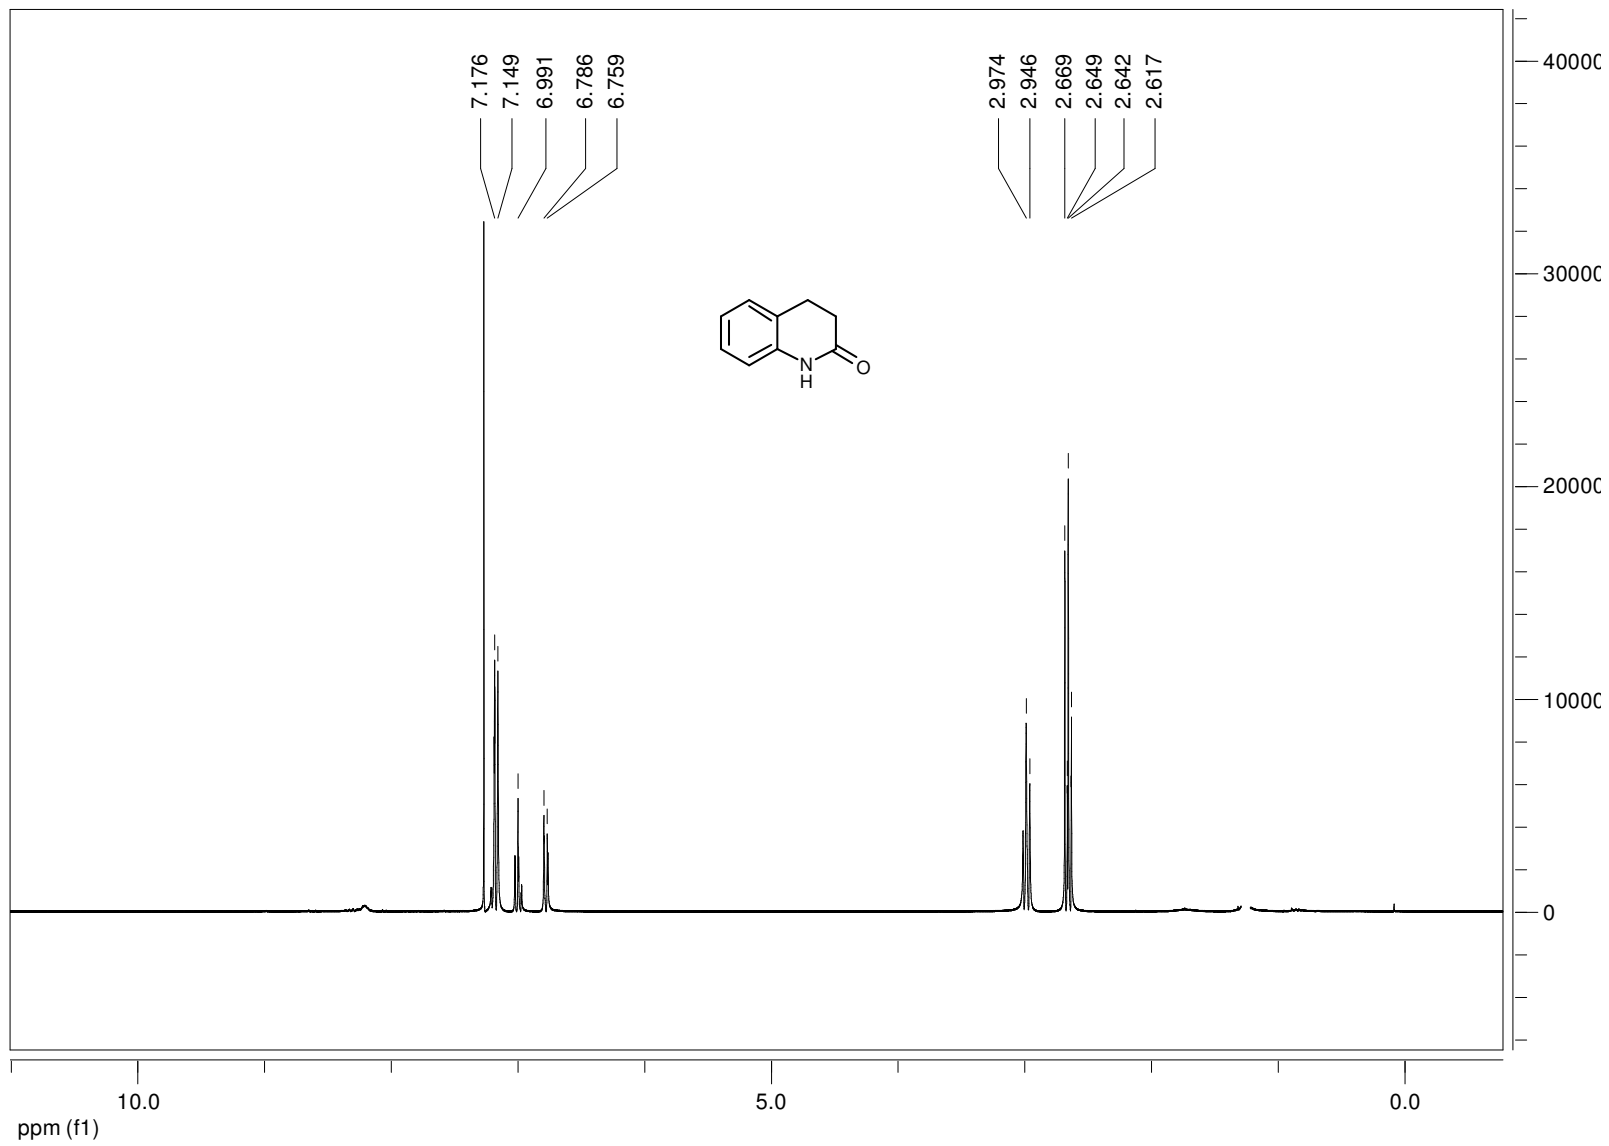

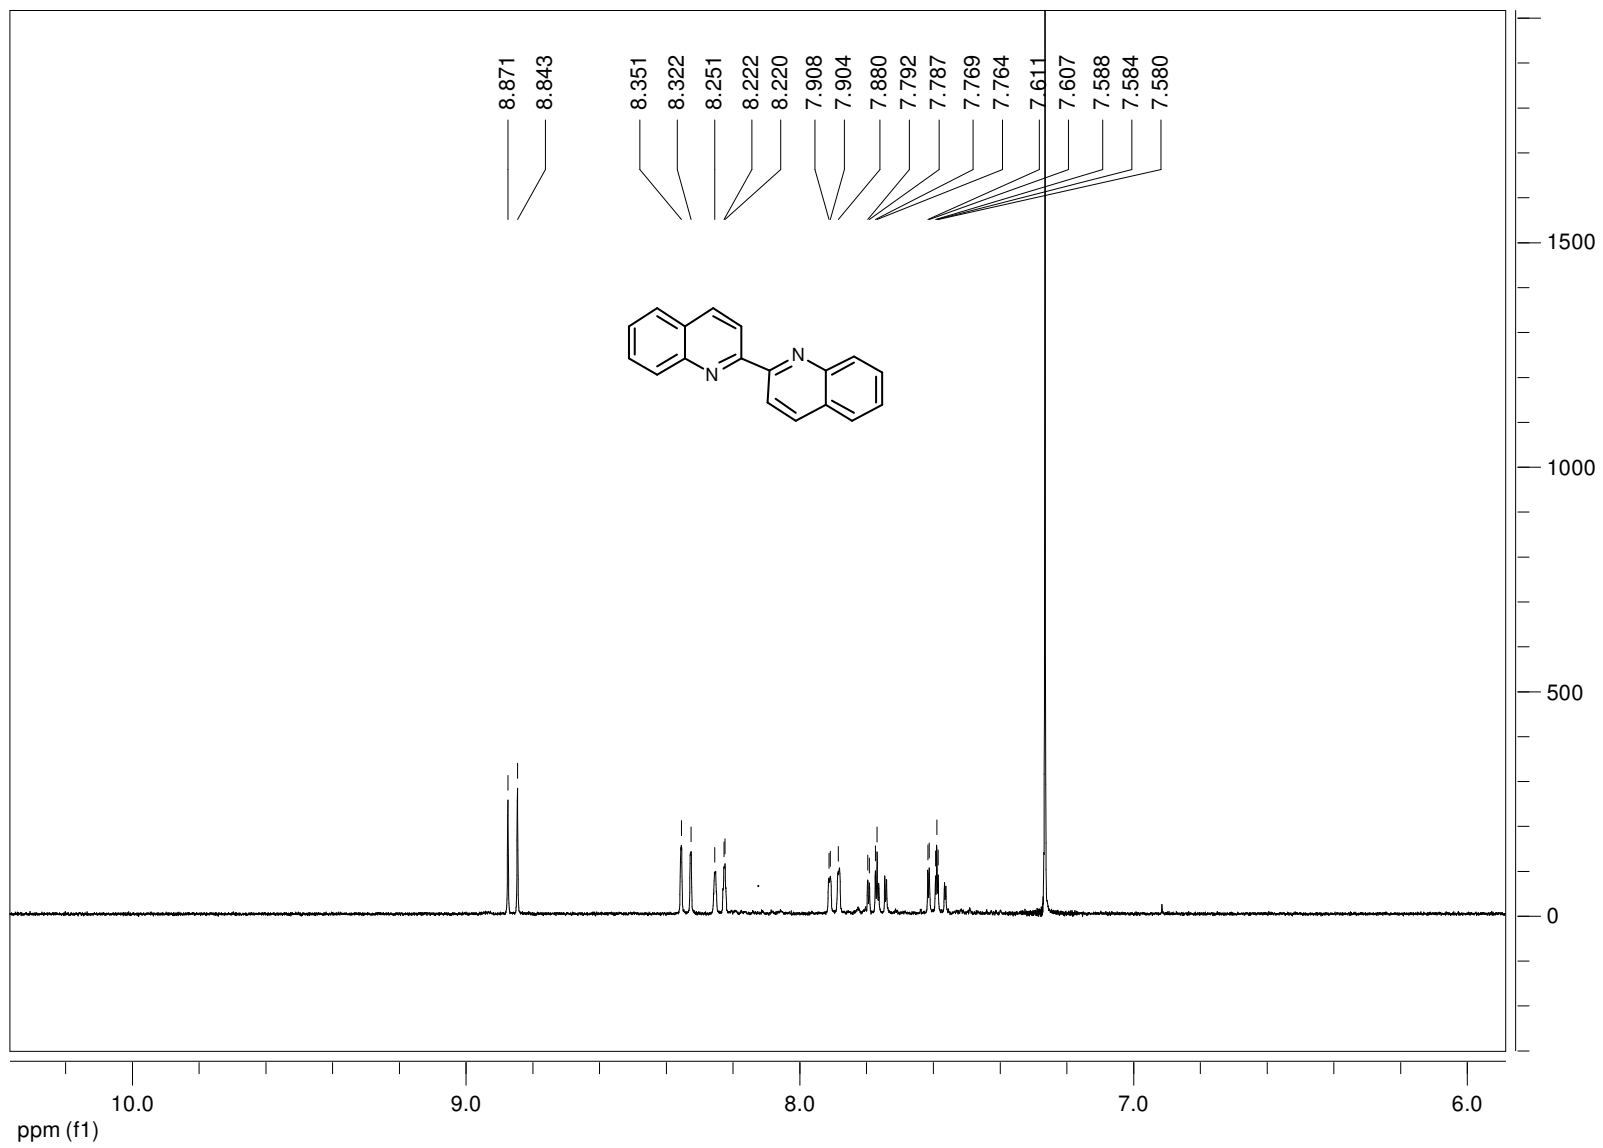

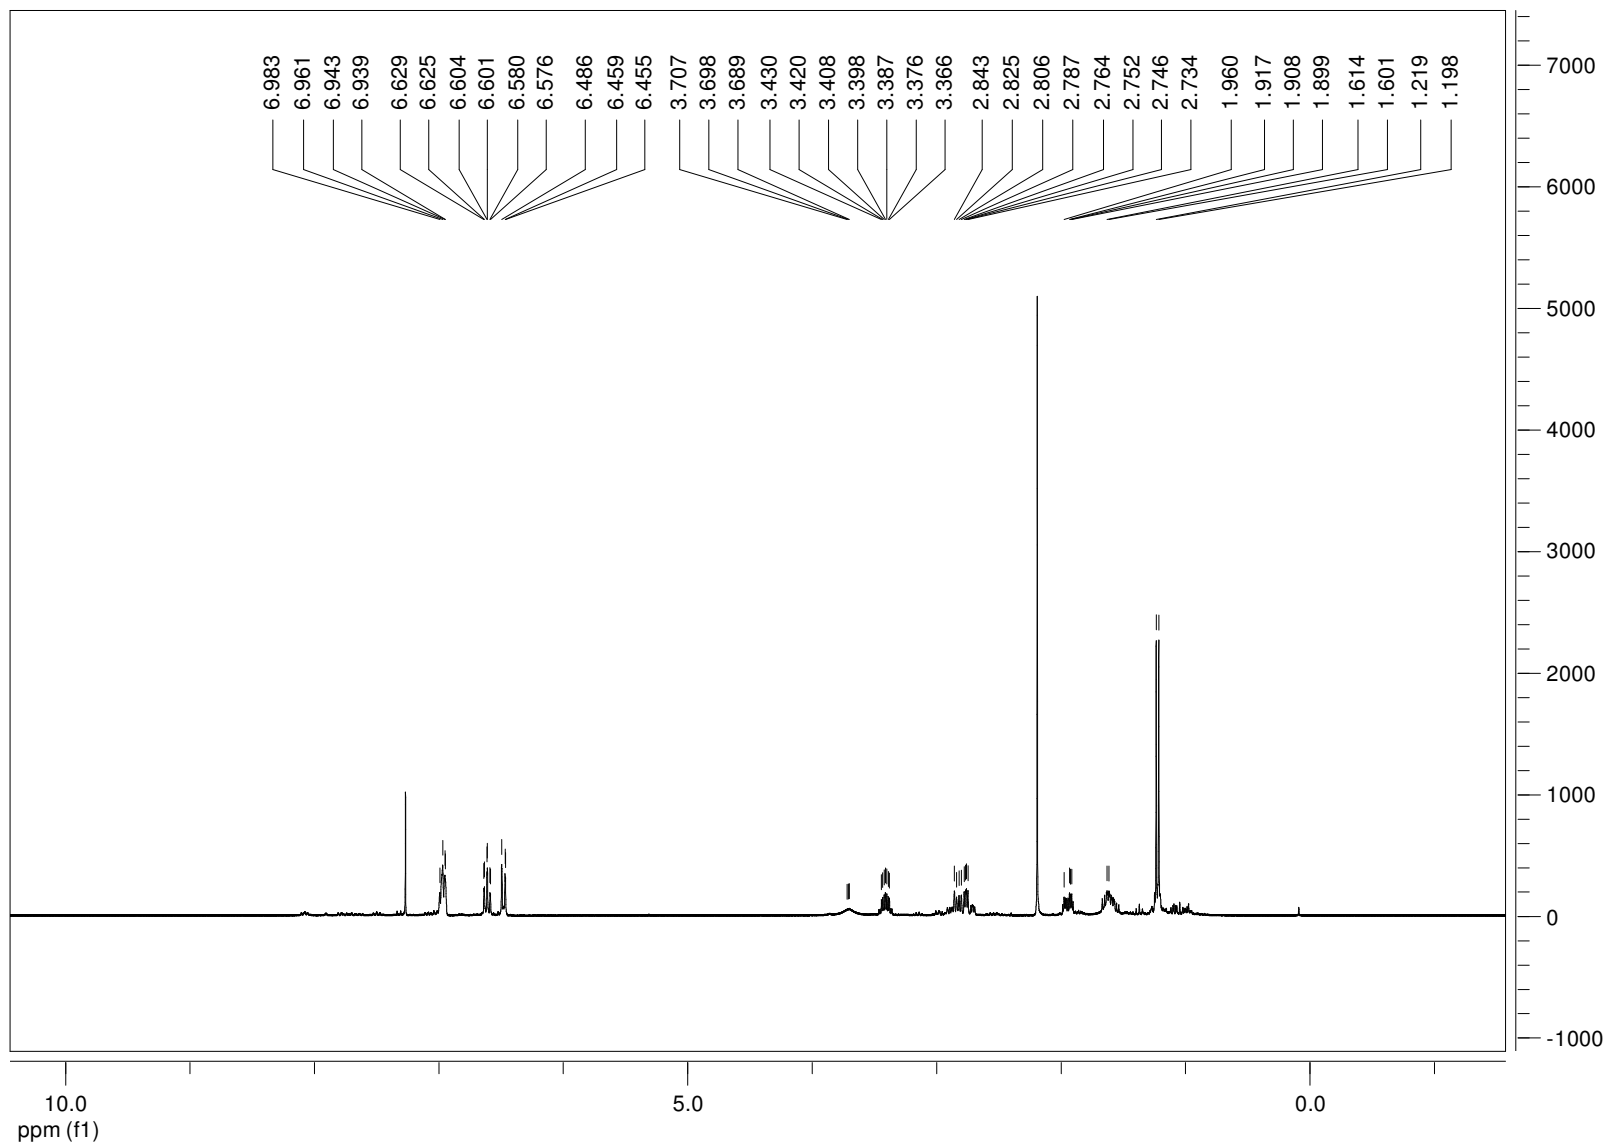

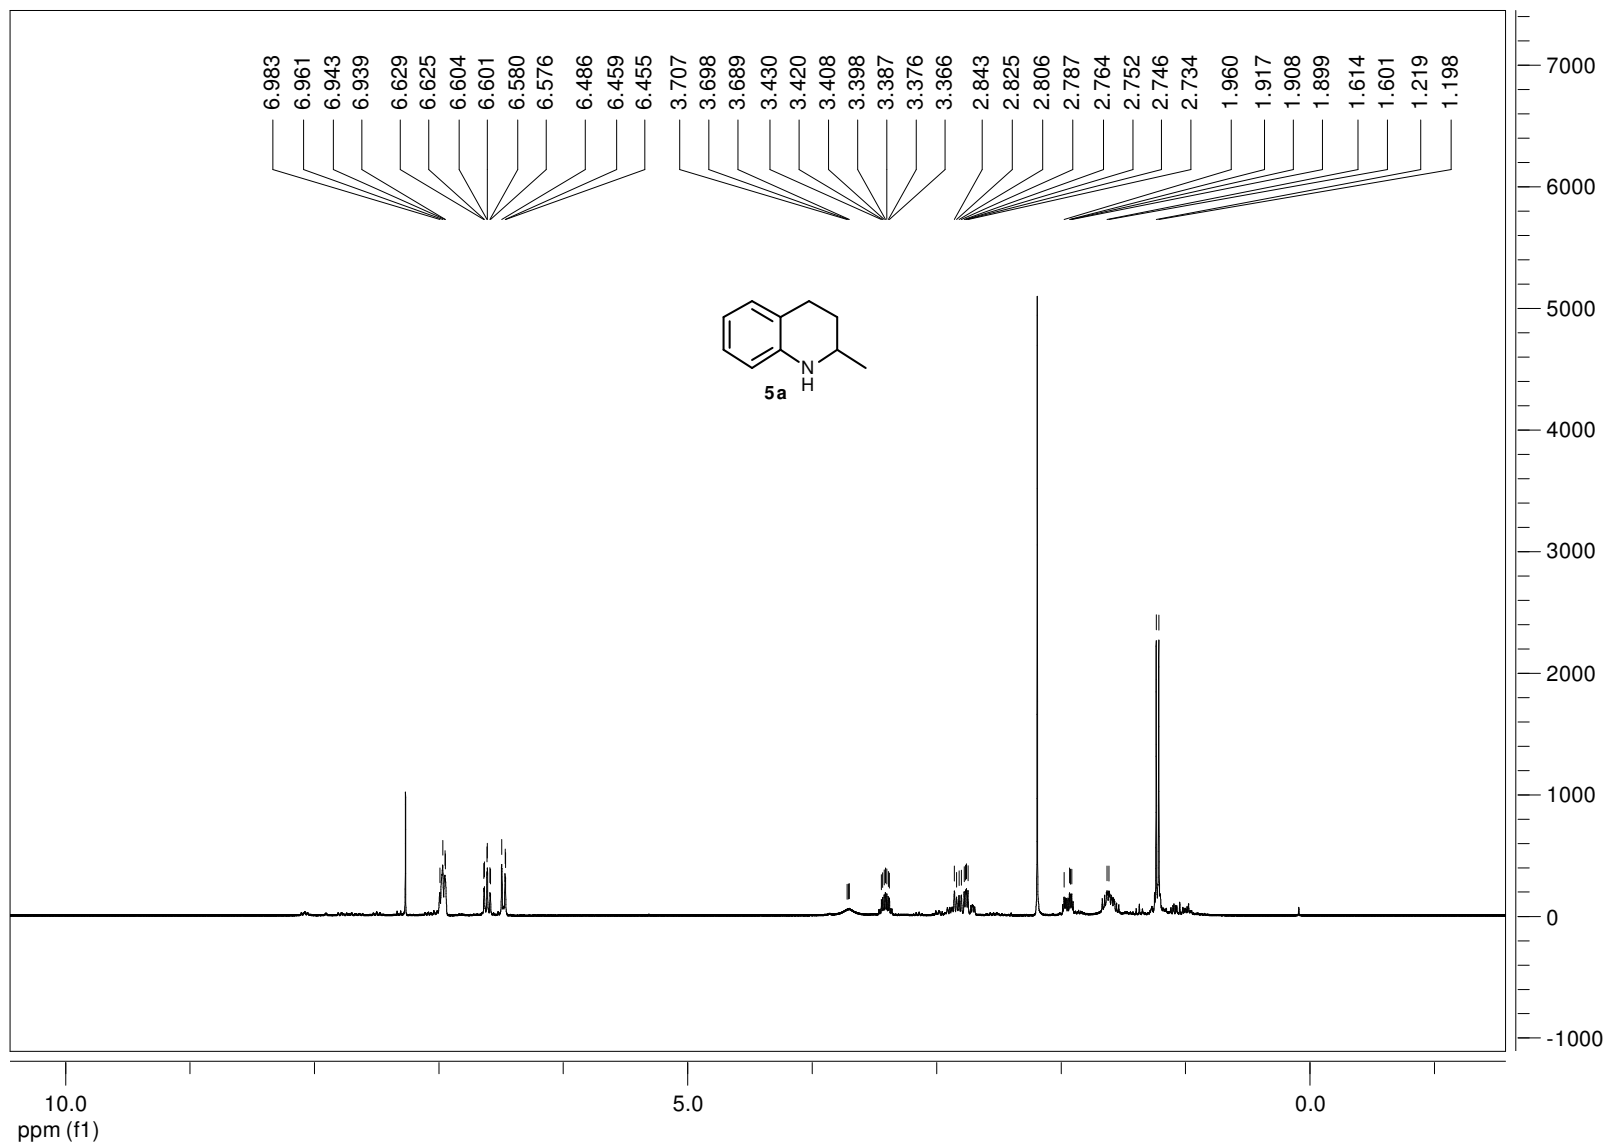

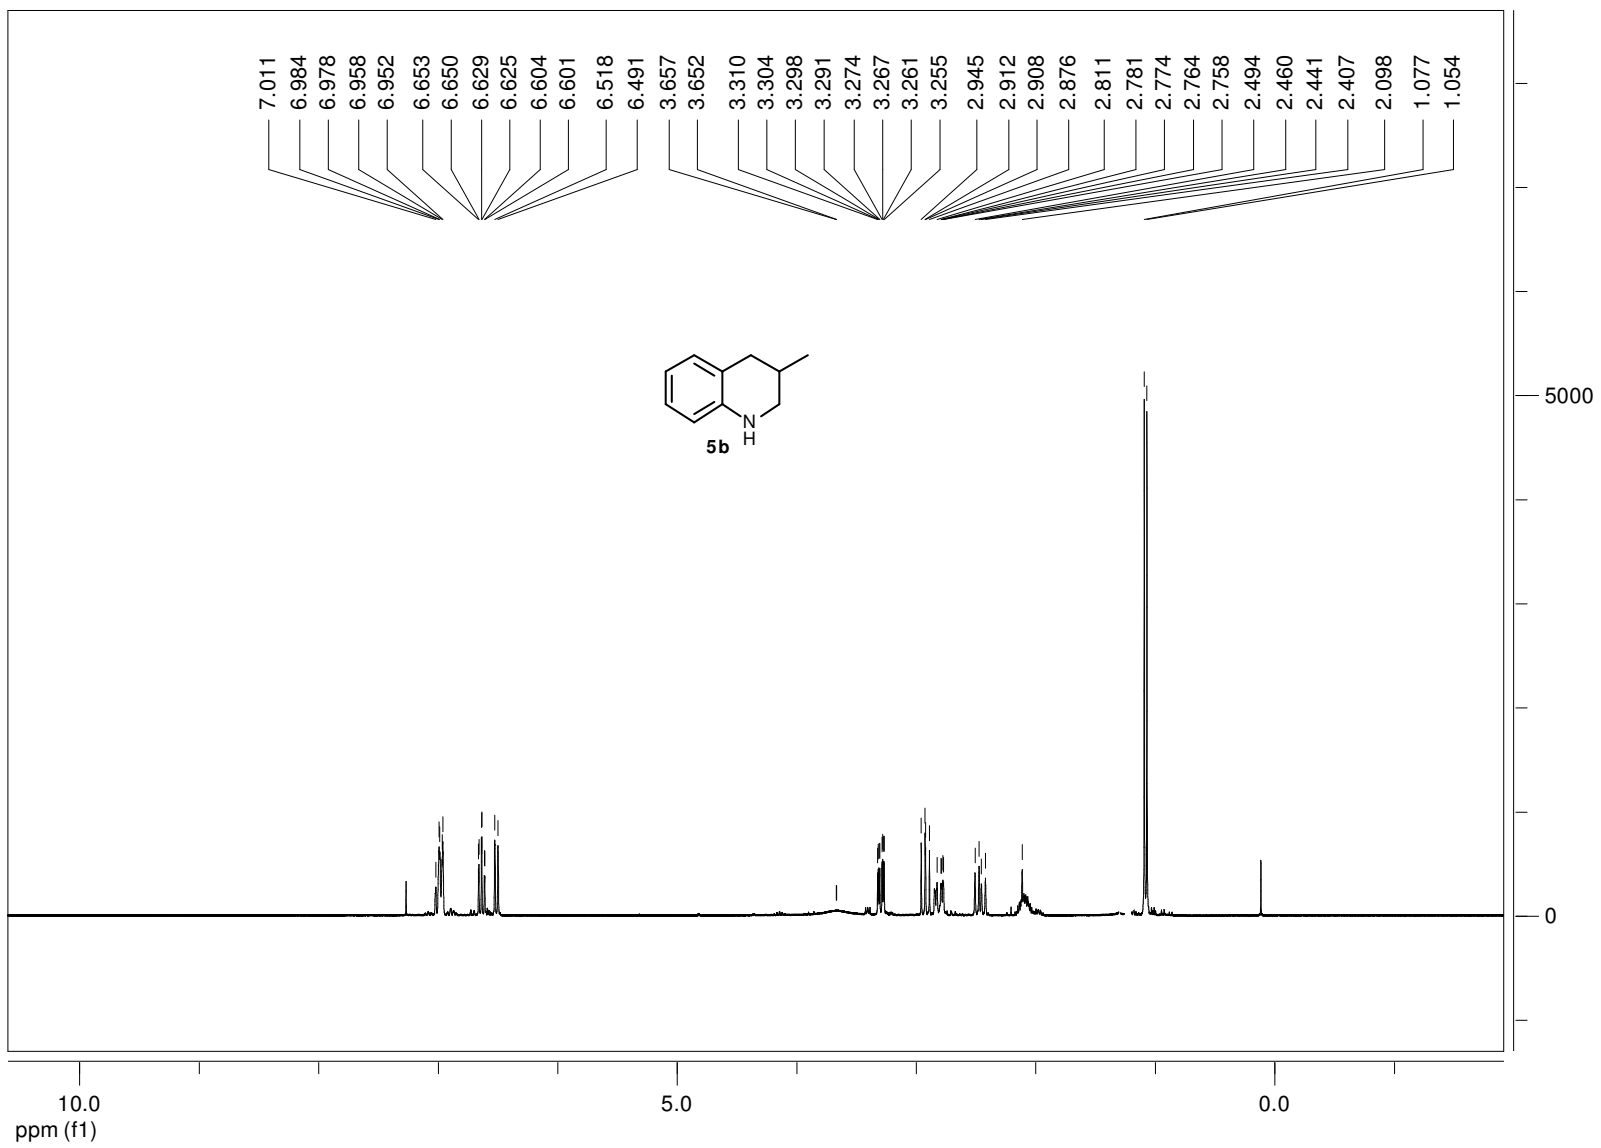

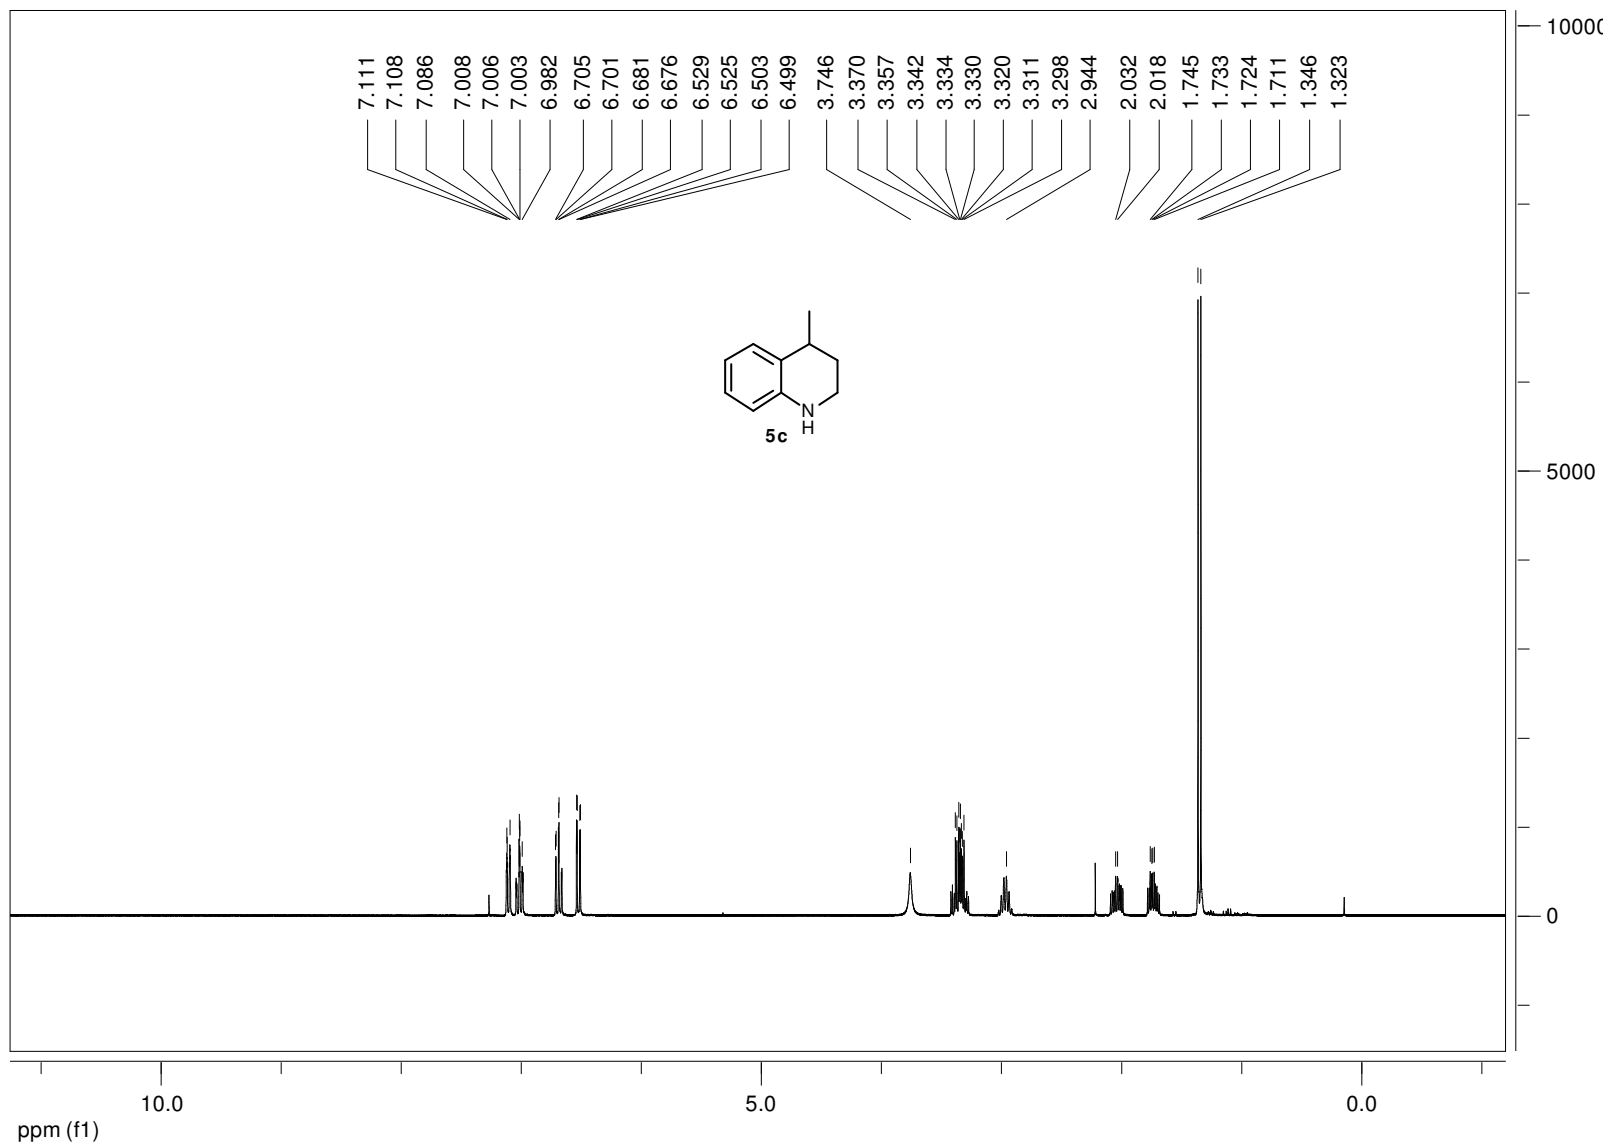

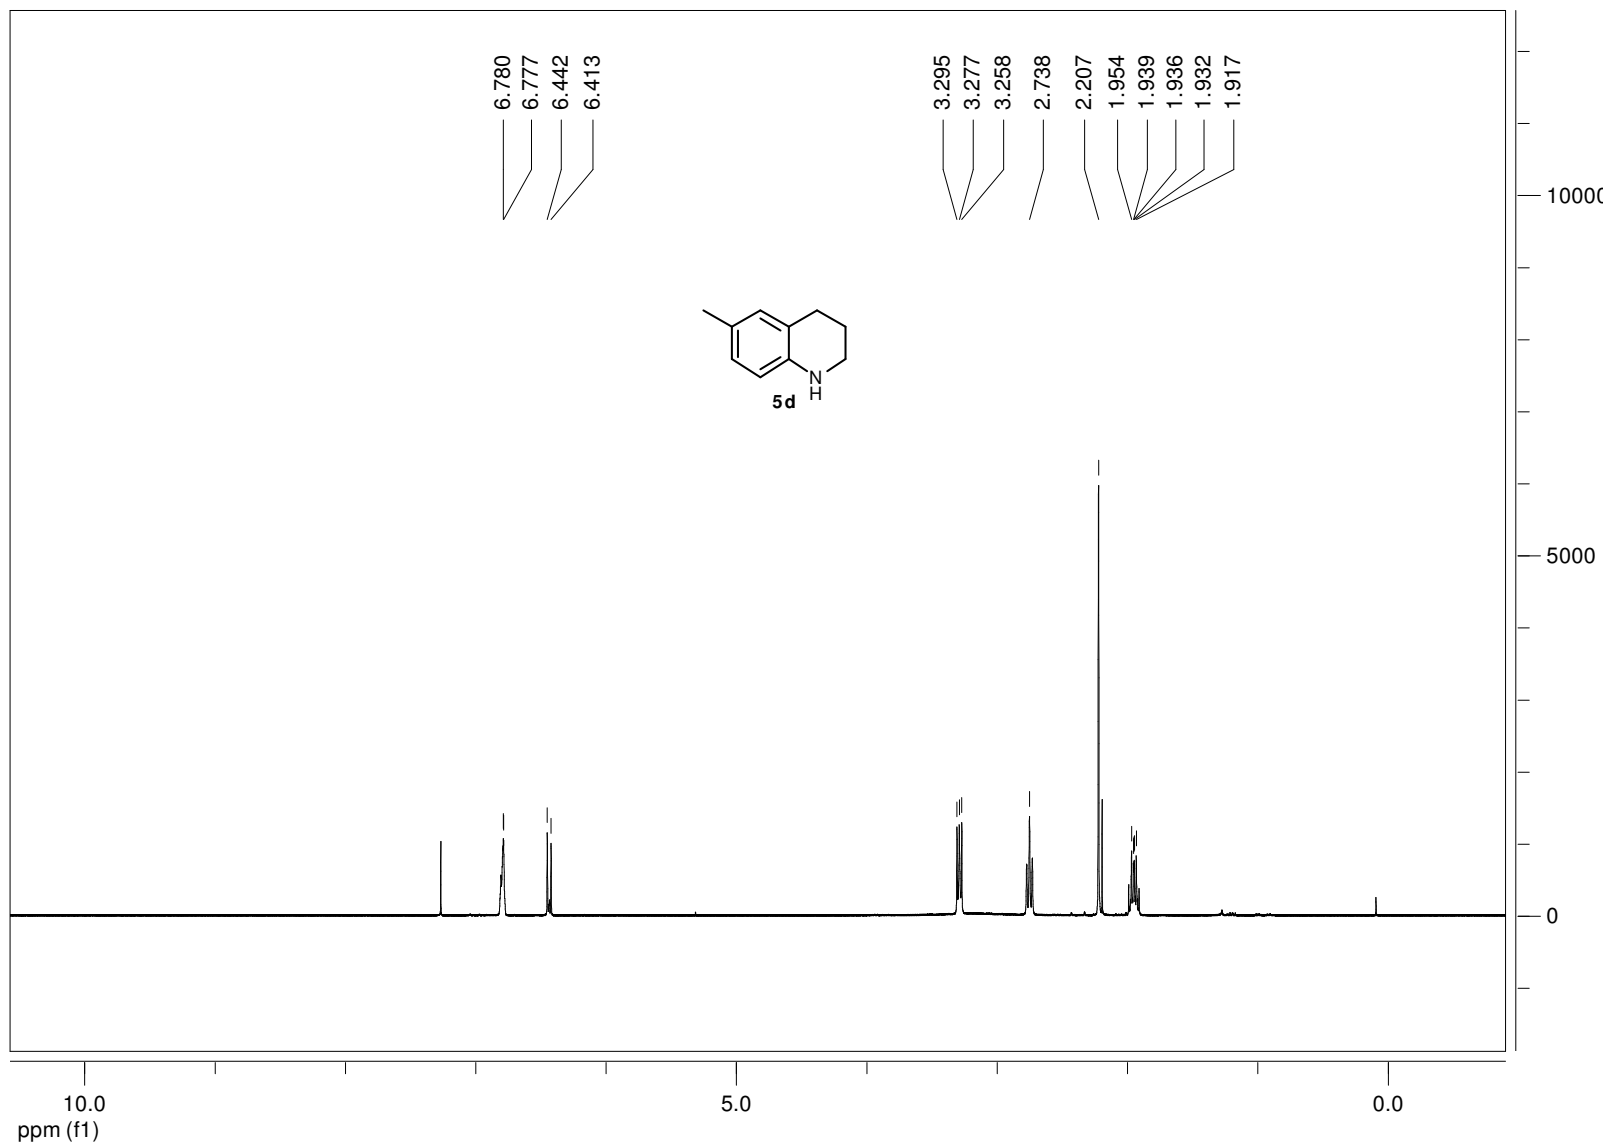



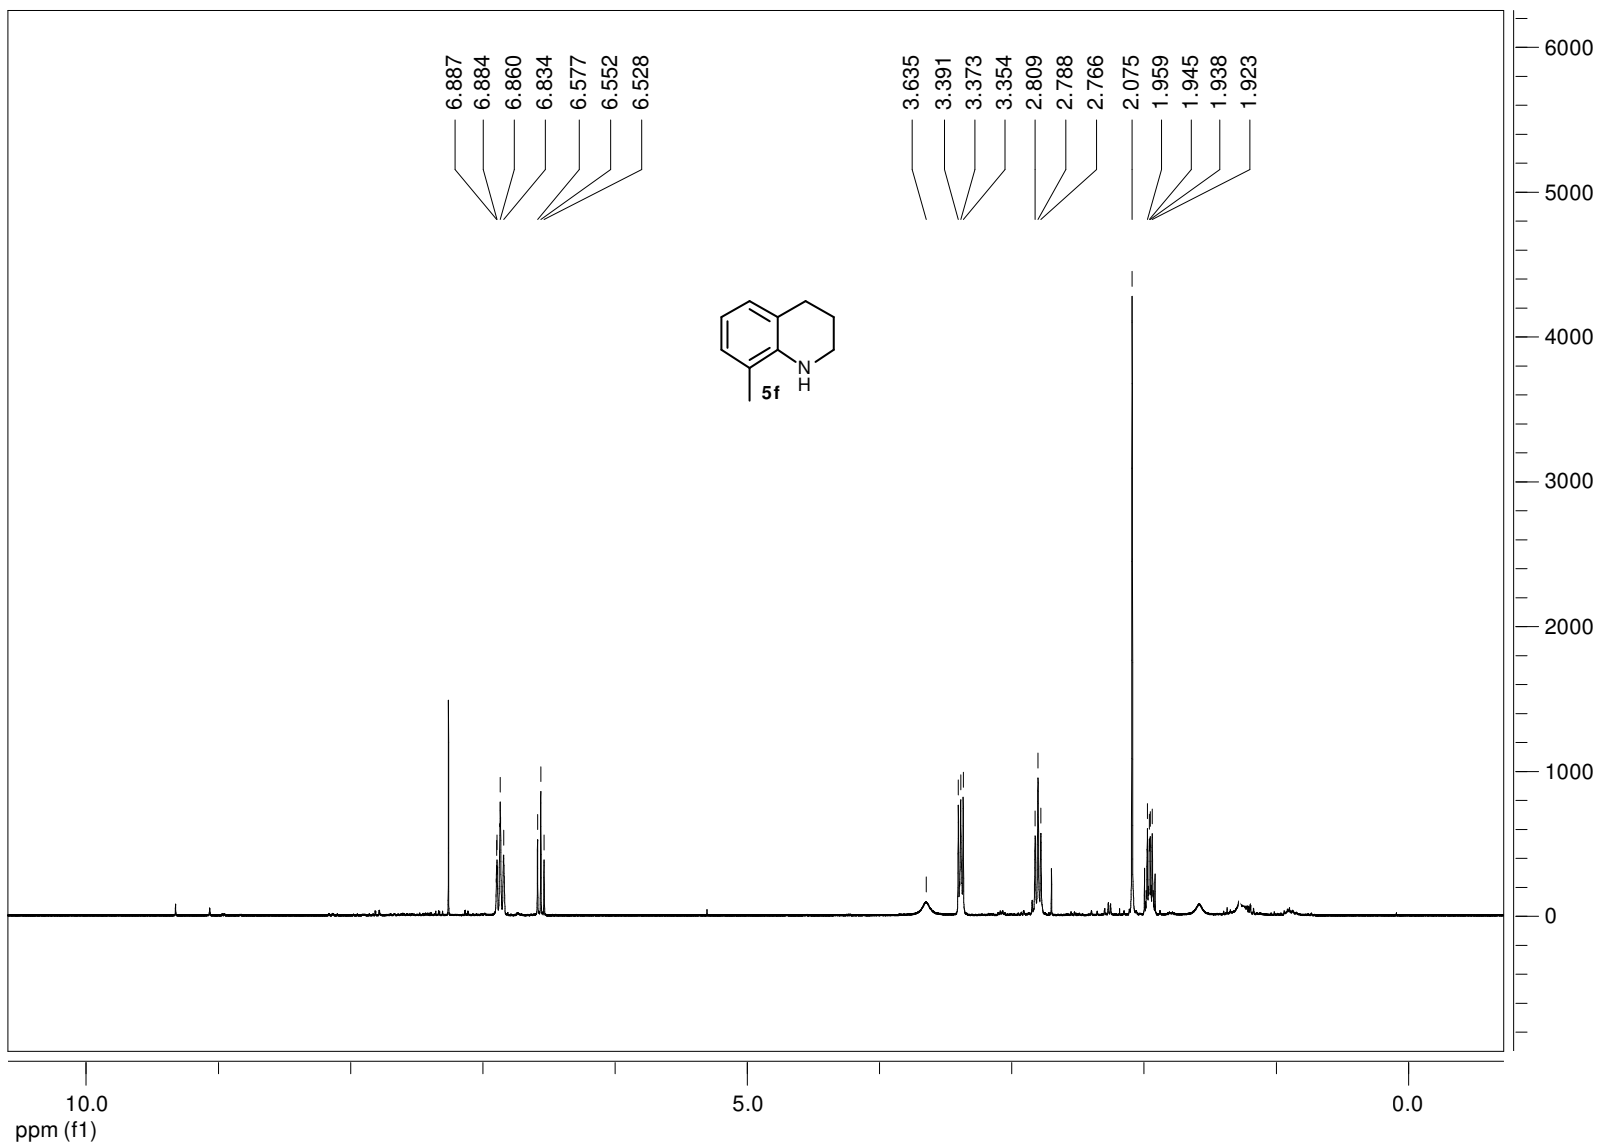

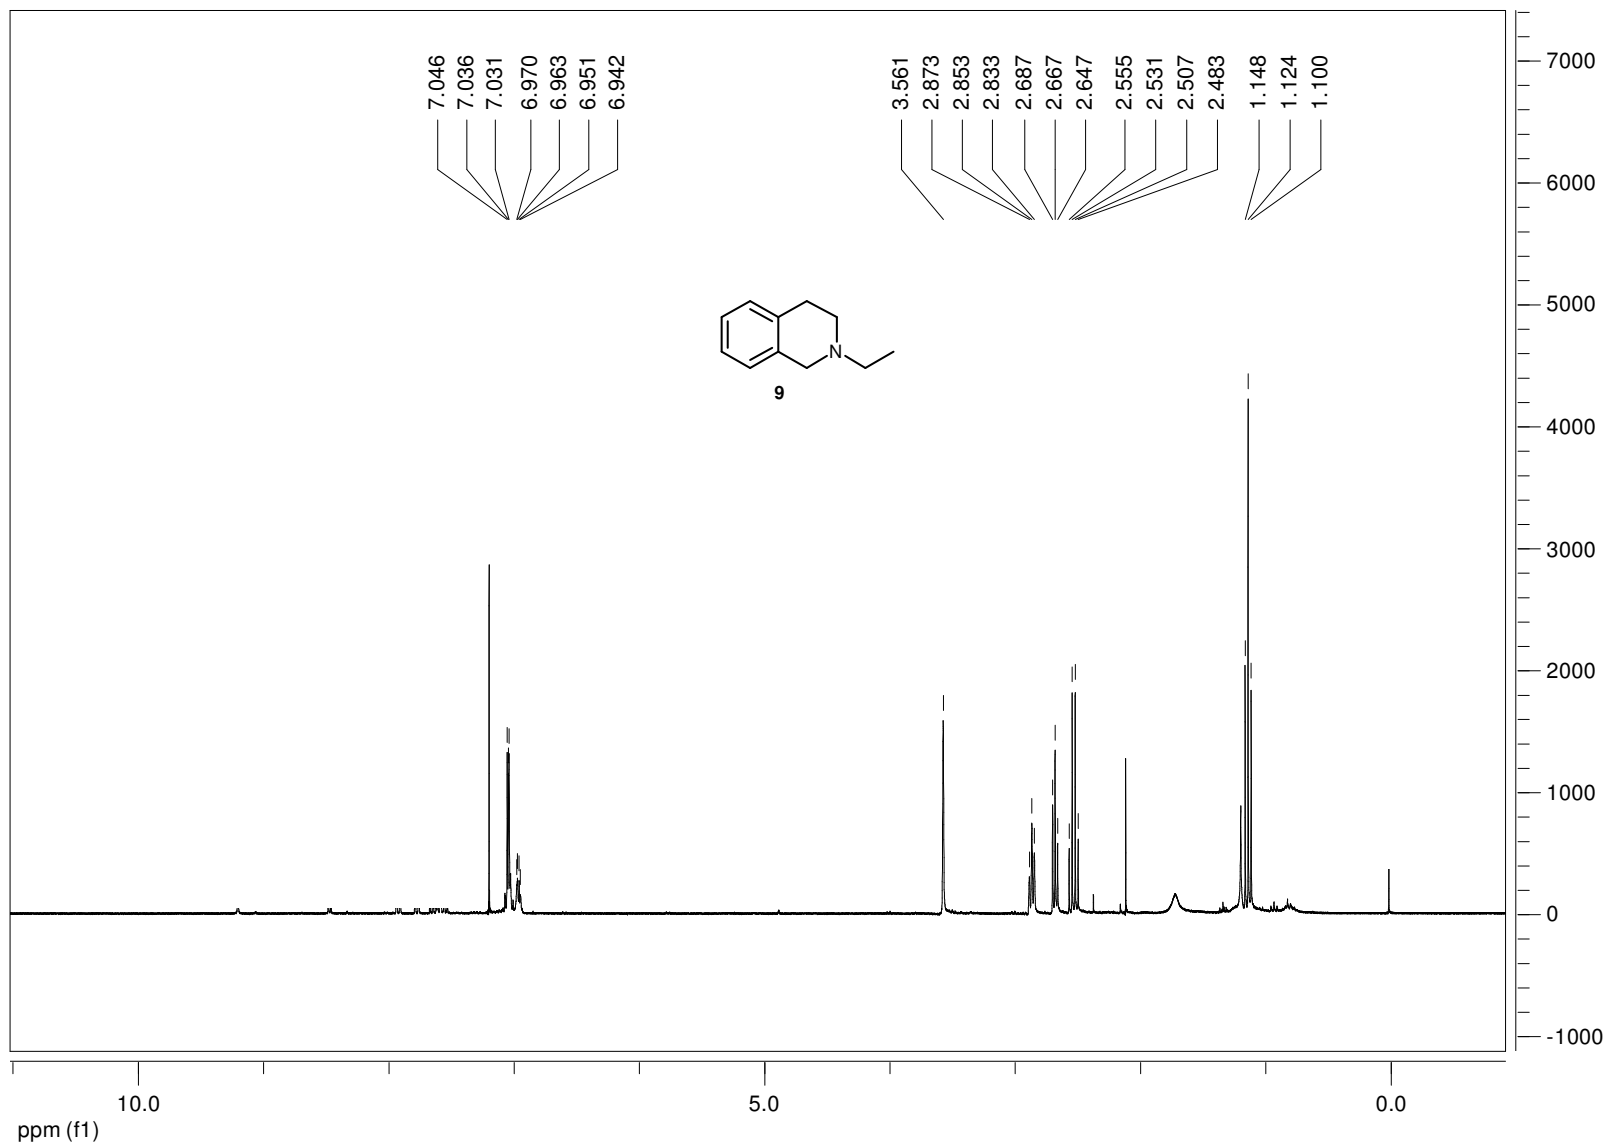

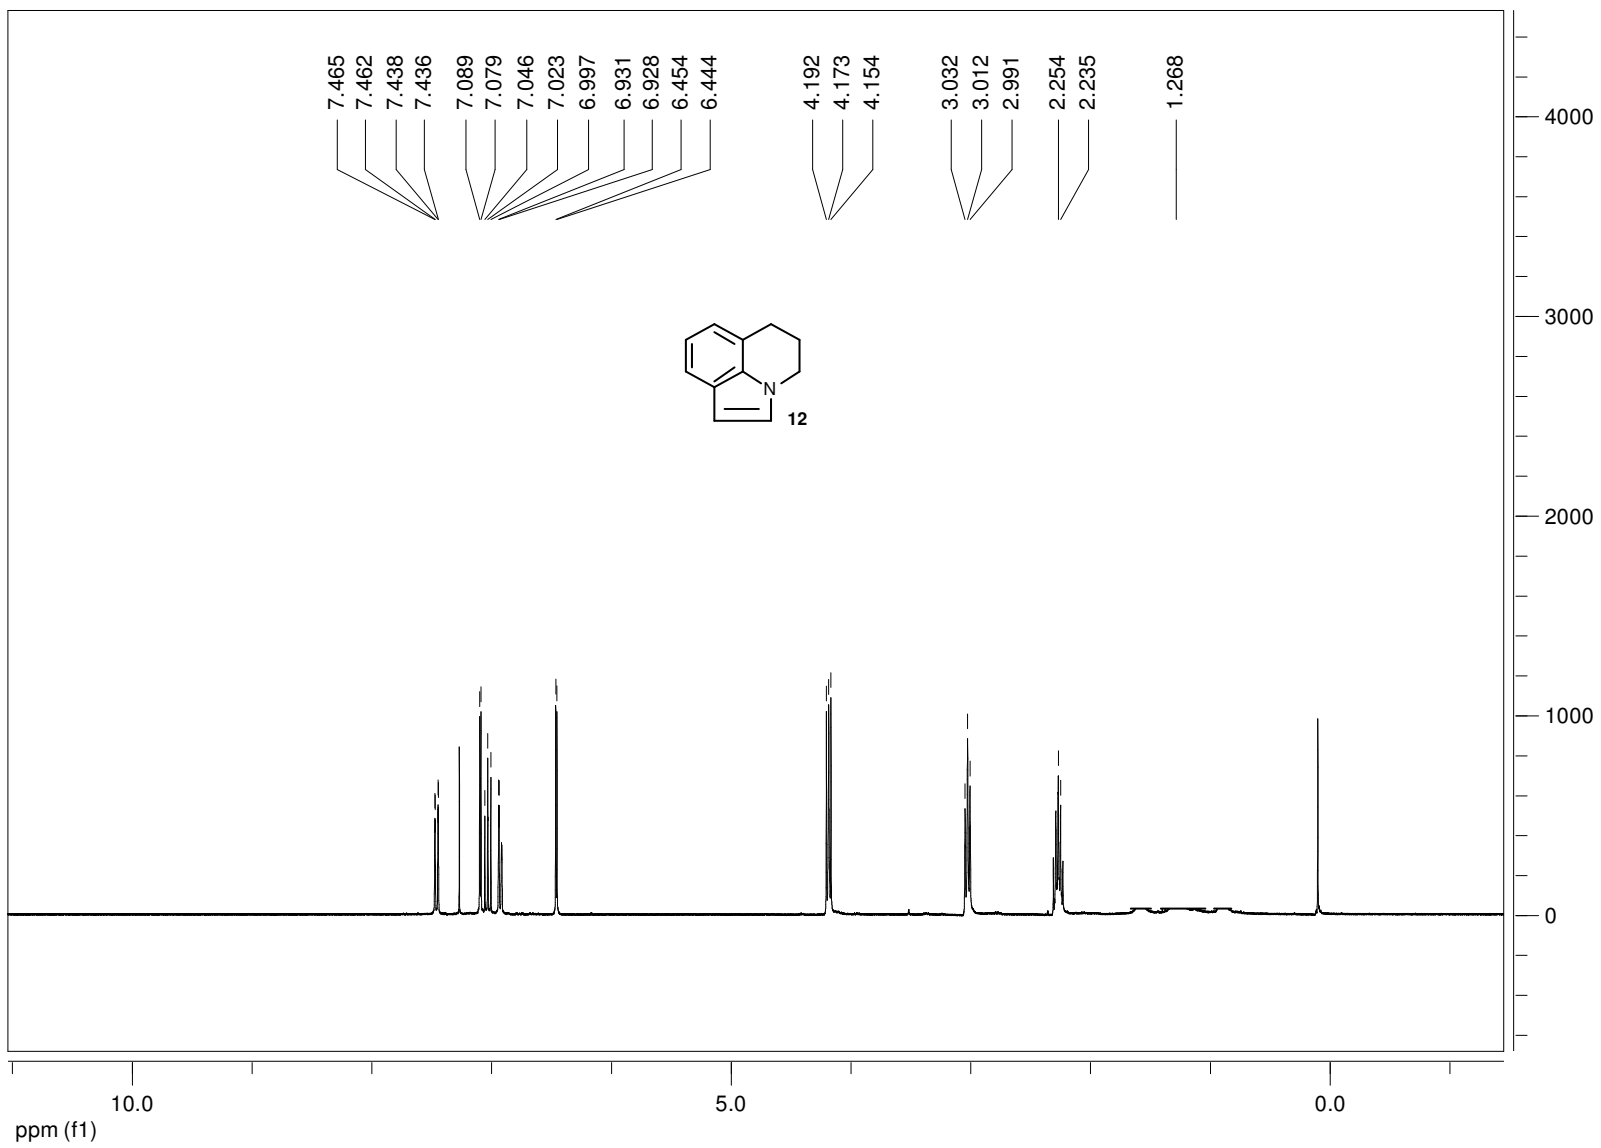

### 3. Spectra of new compounds.

Compound **3c**

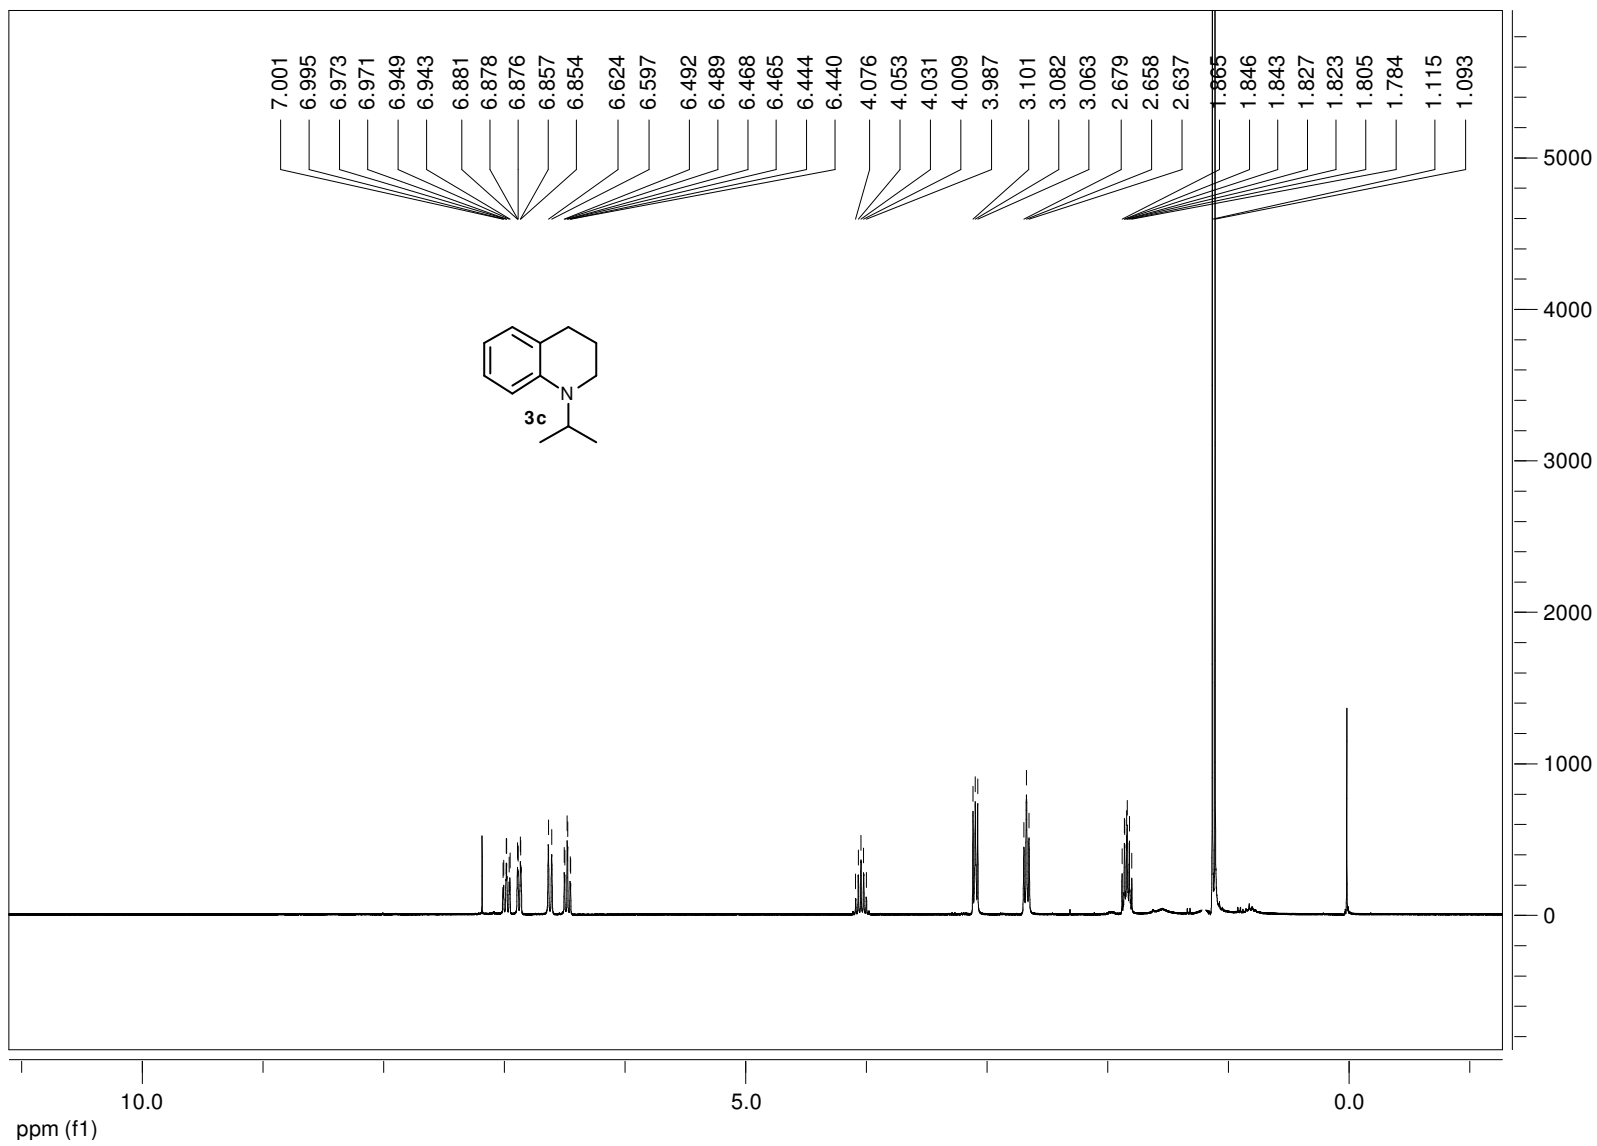

Compound **3c**

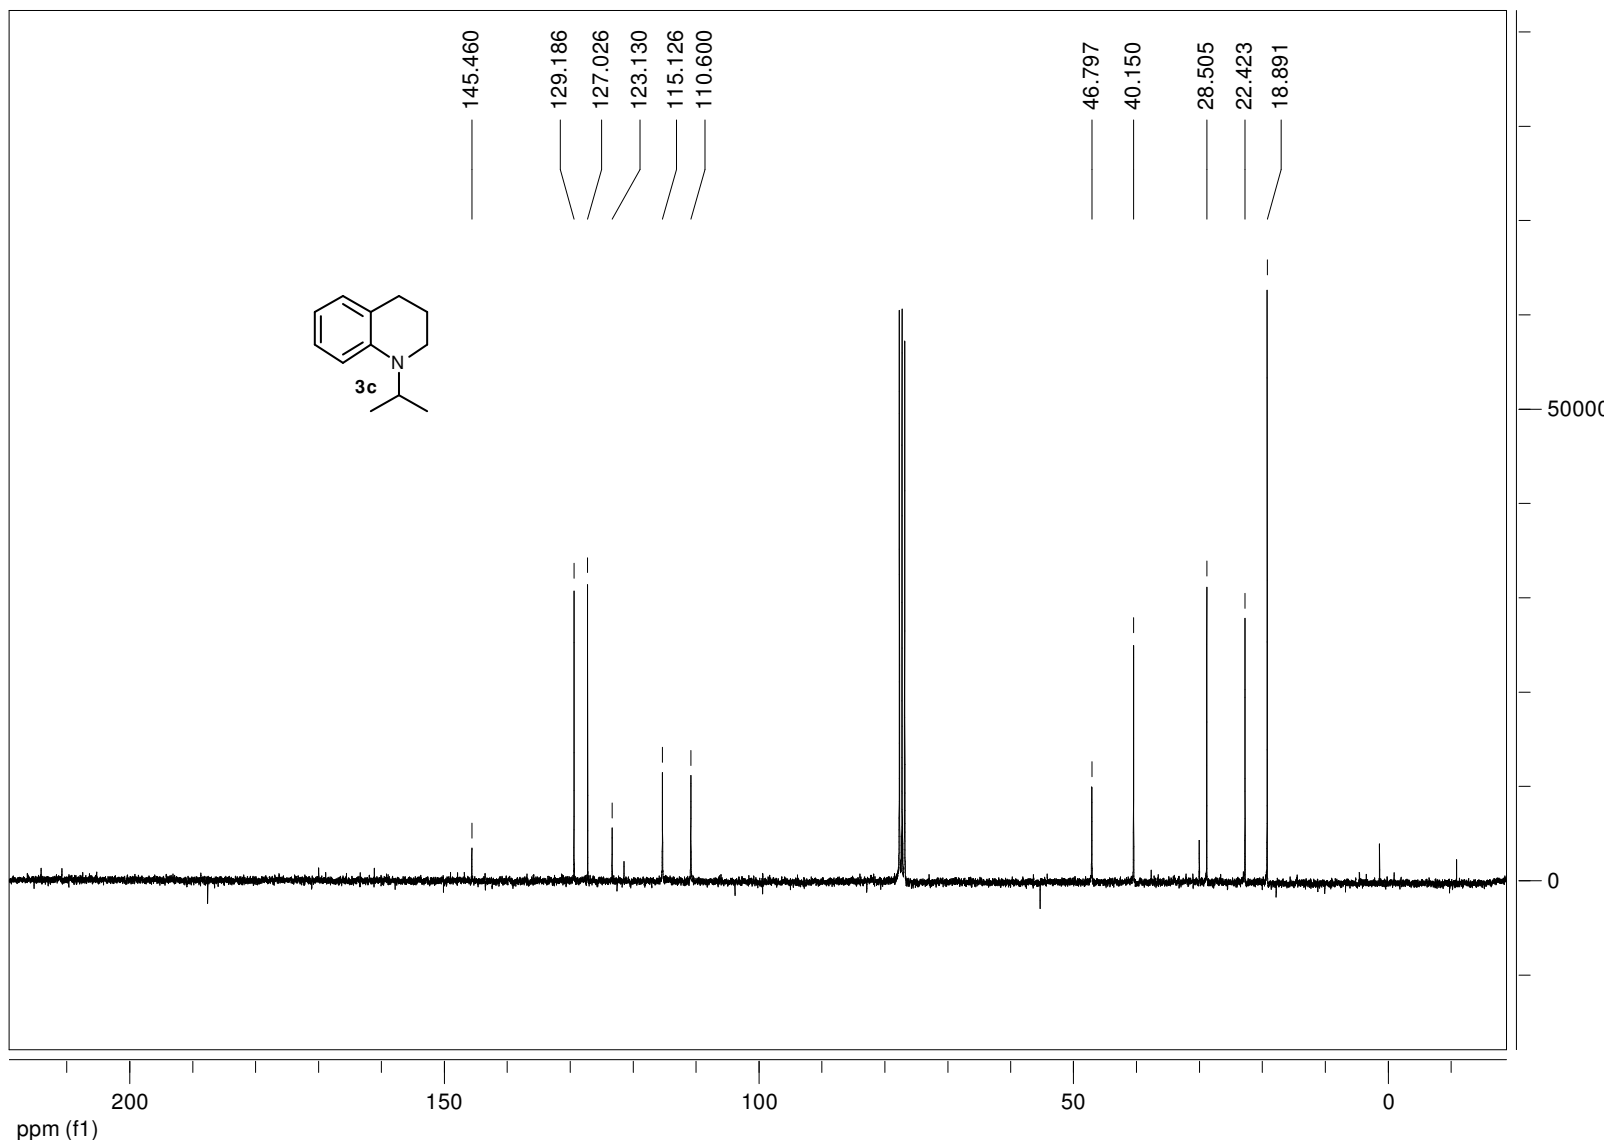

Compound **5e**

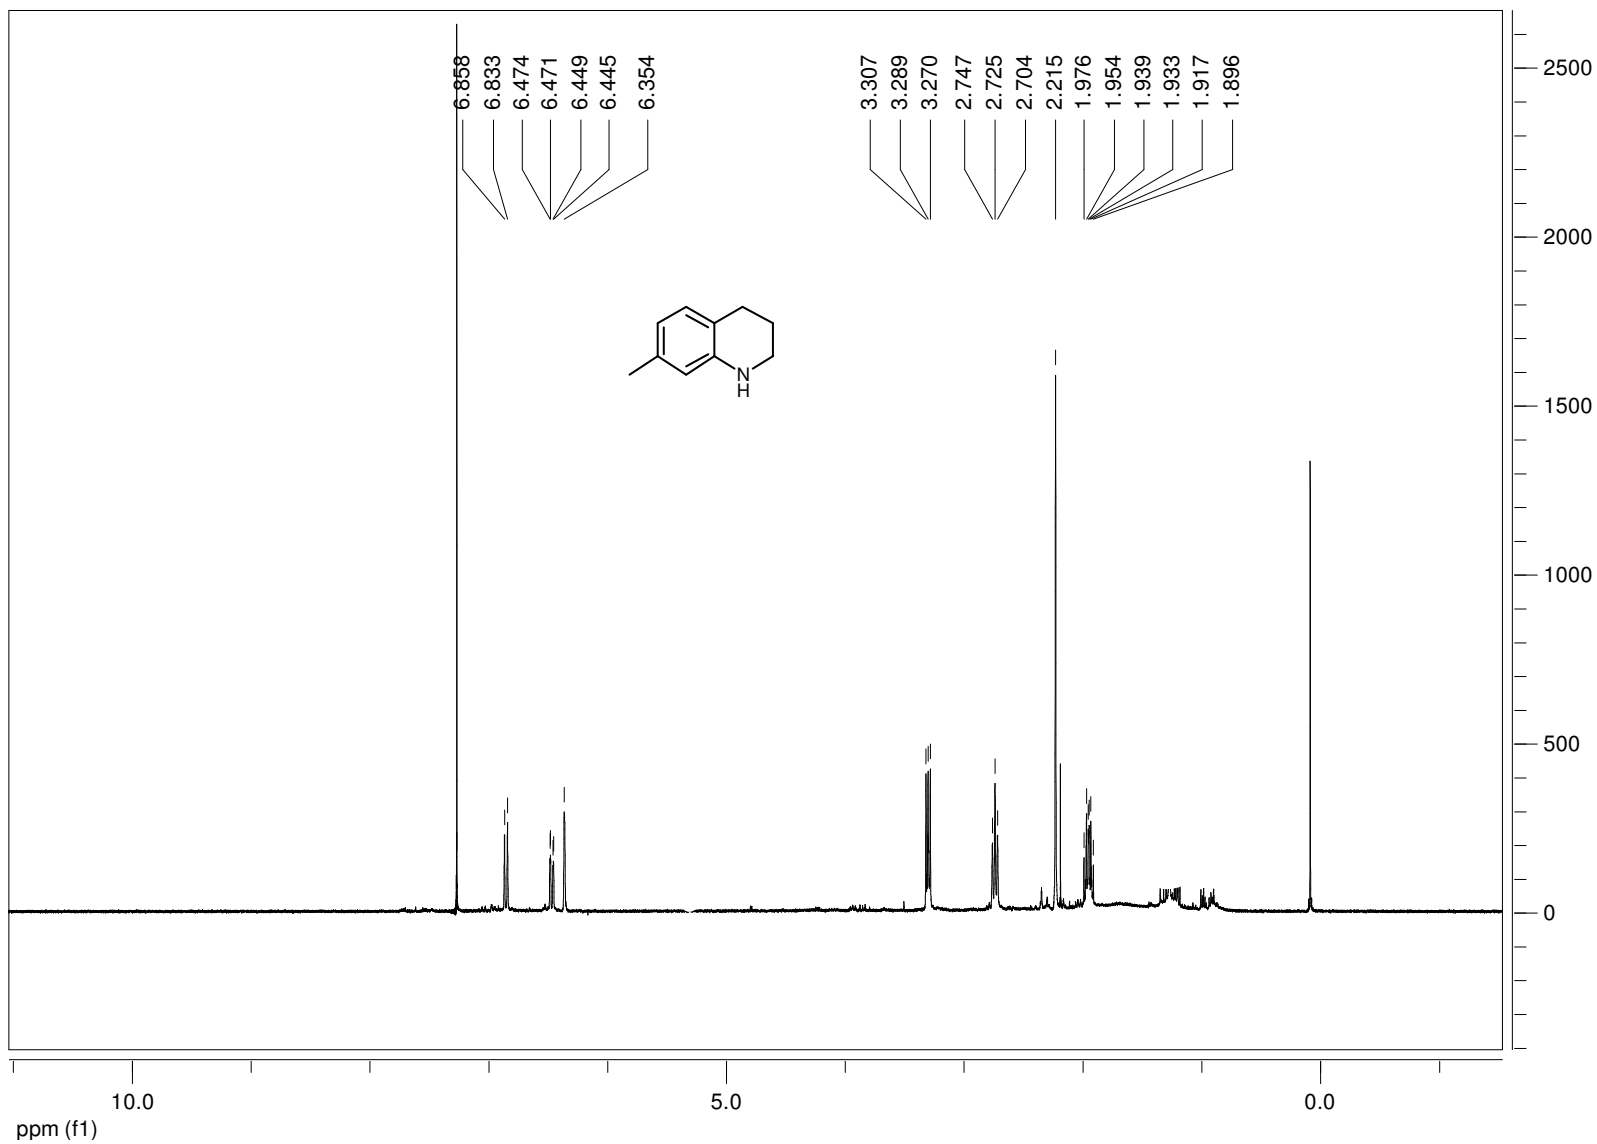

Compound **5e**

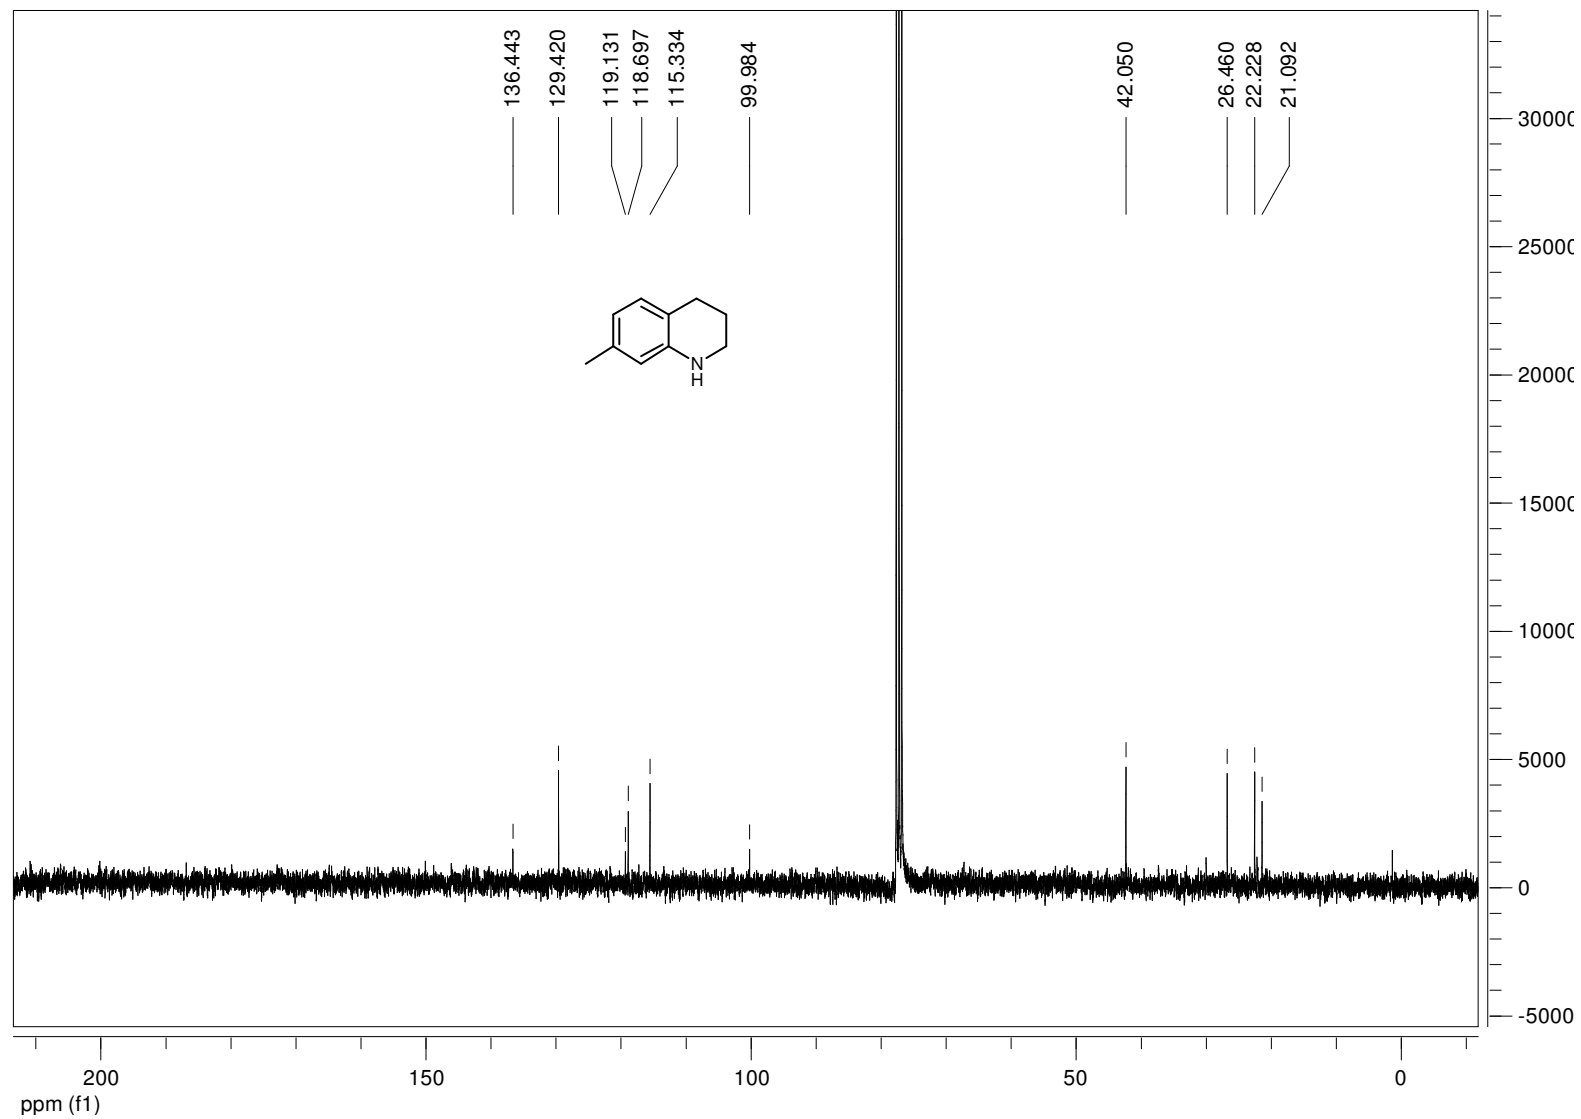



Compound **6a**

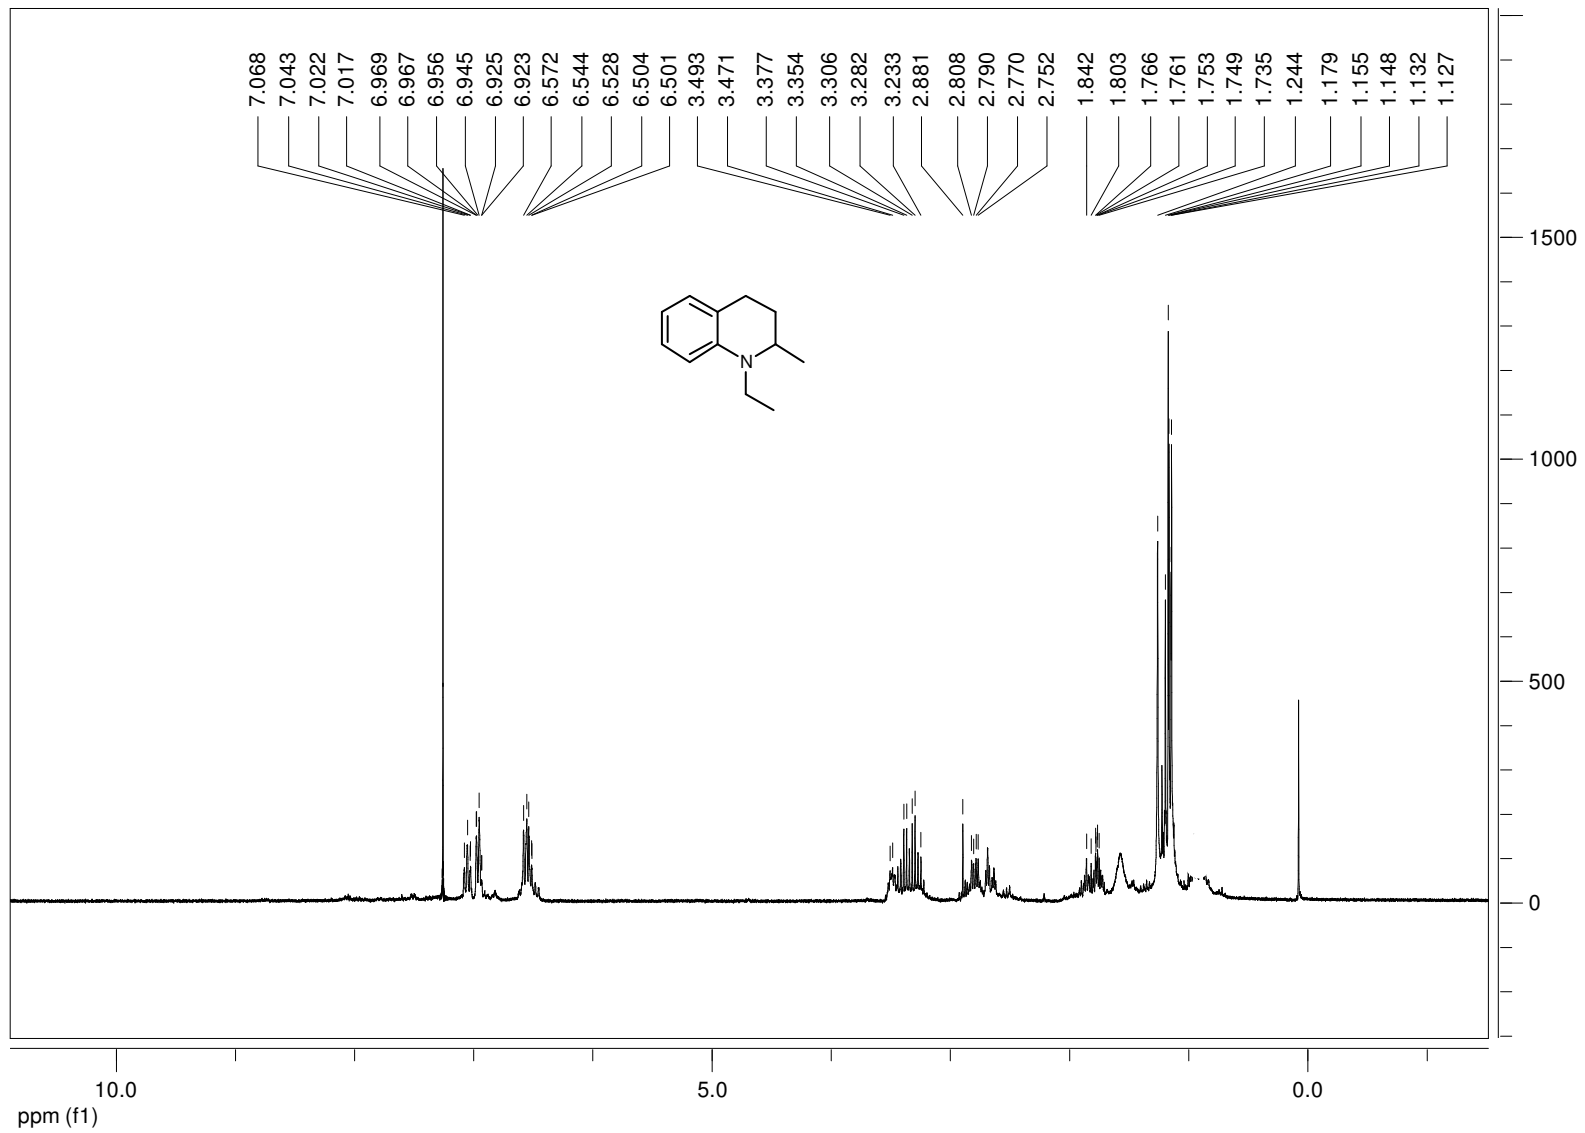

Compound **6a**

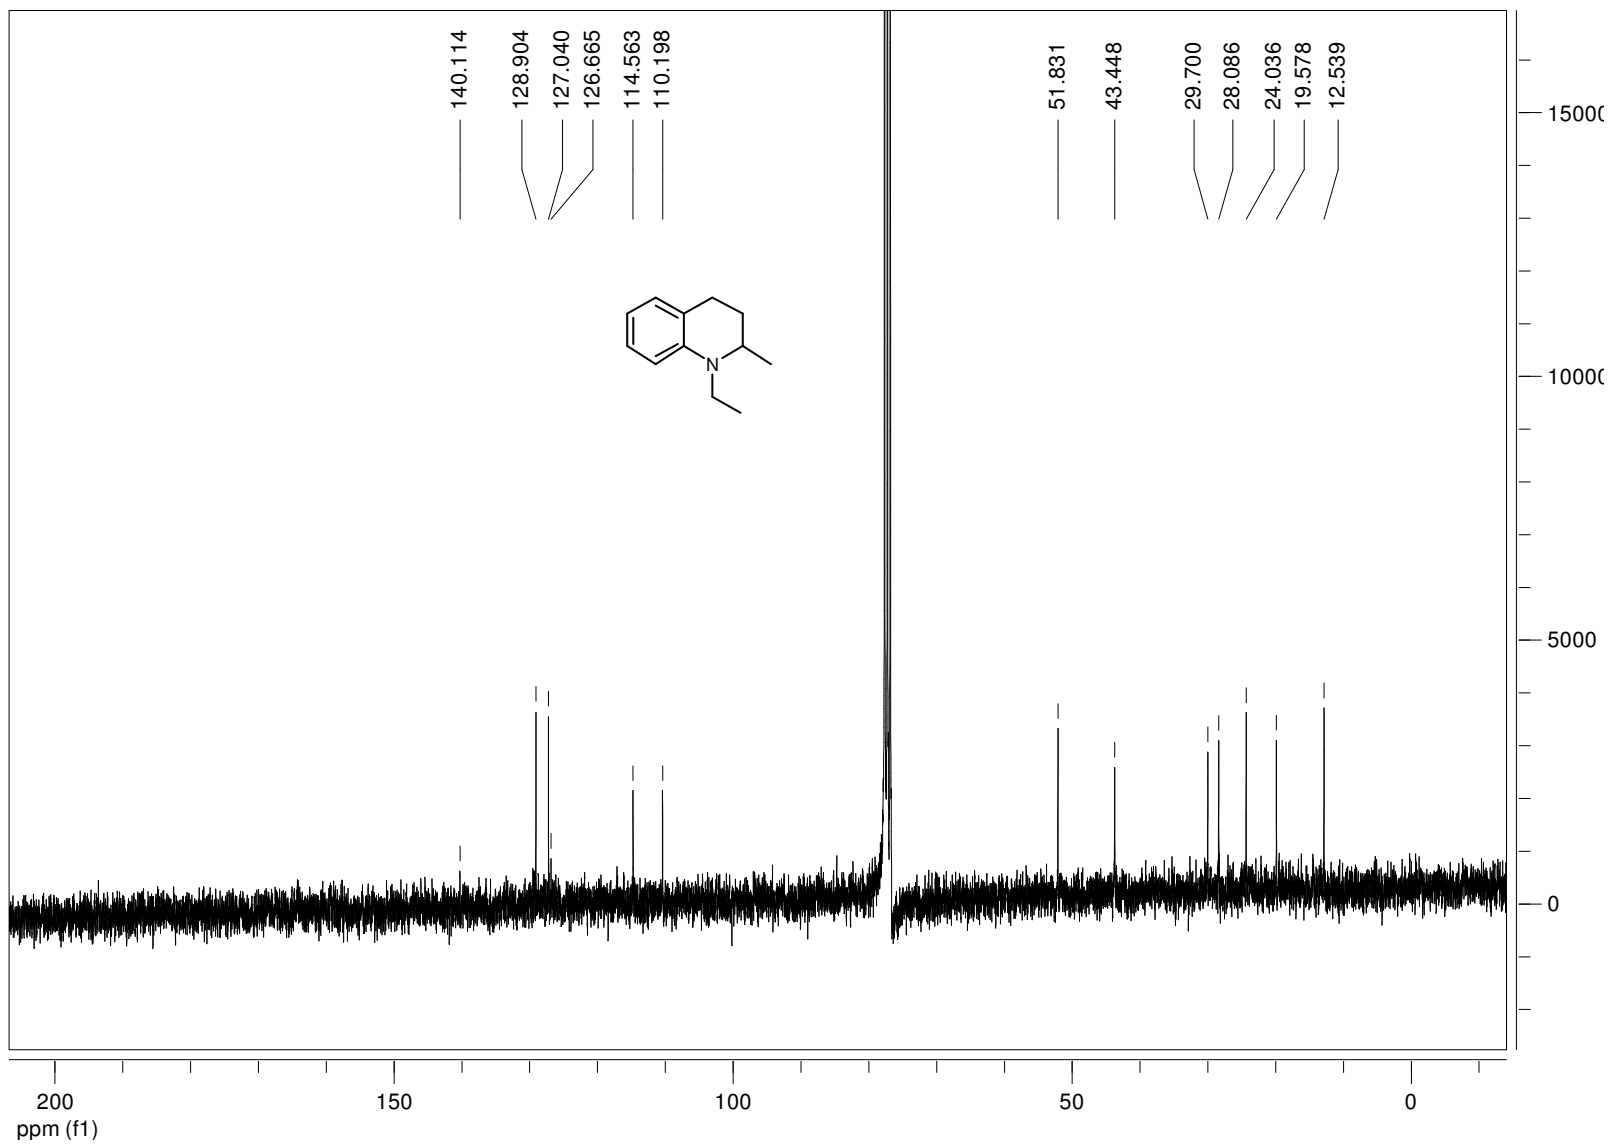

Compound **6b**

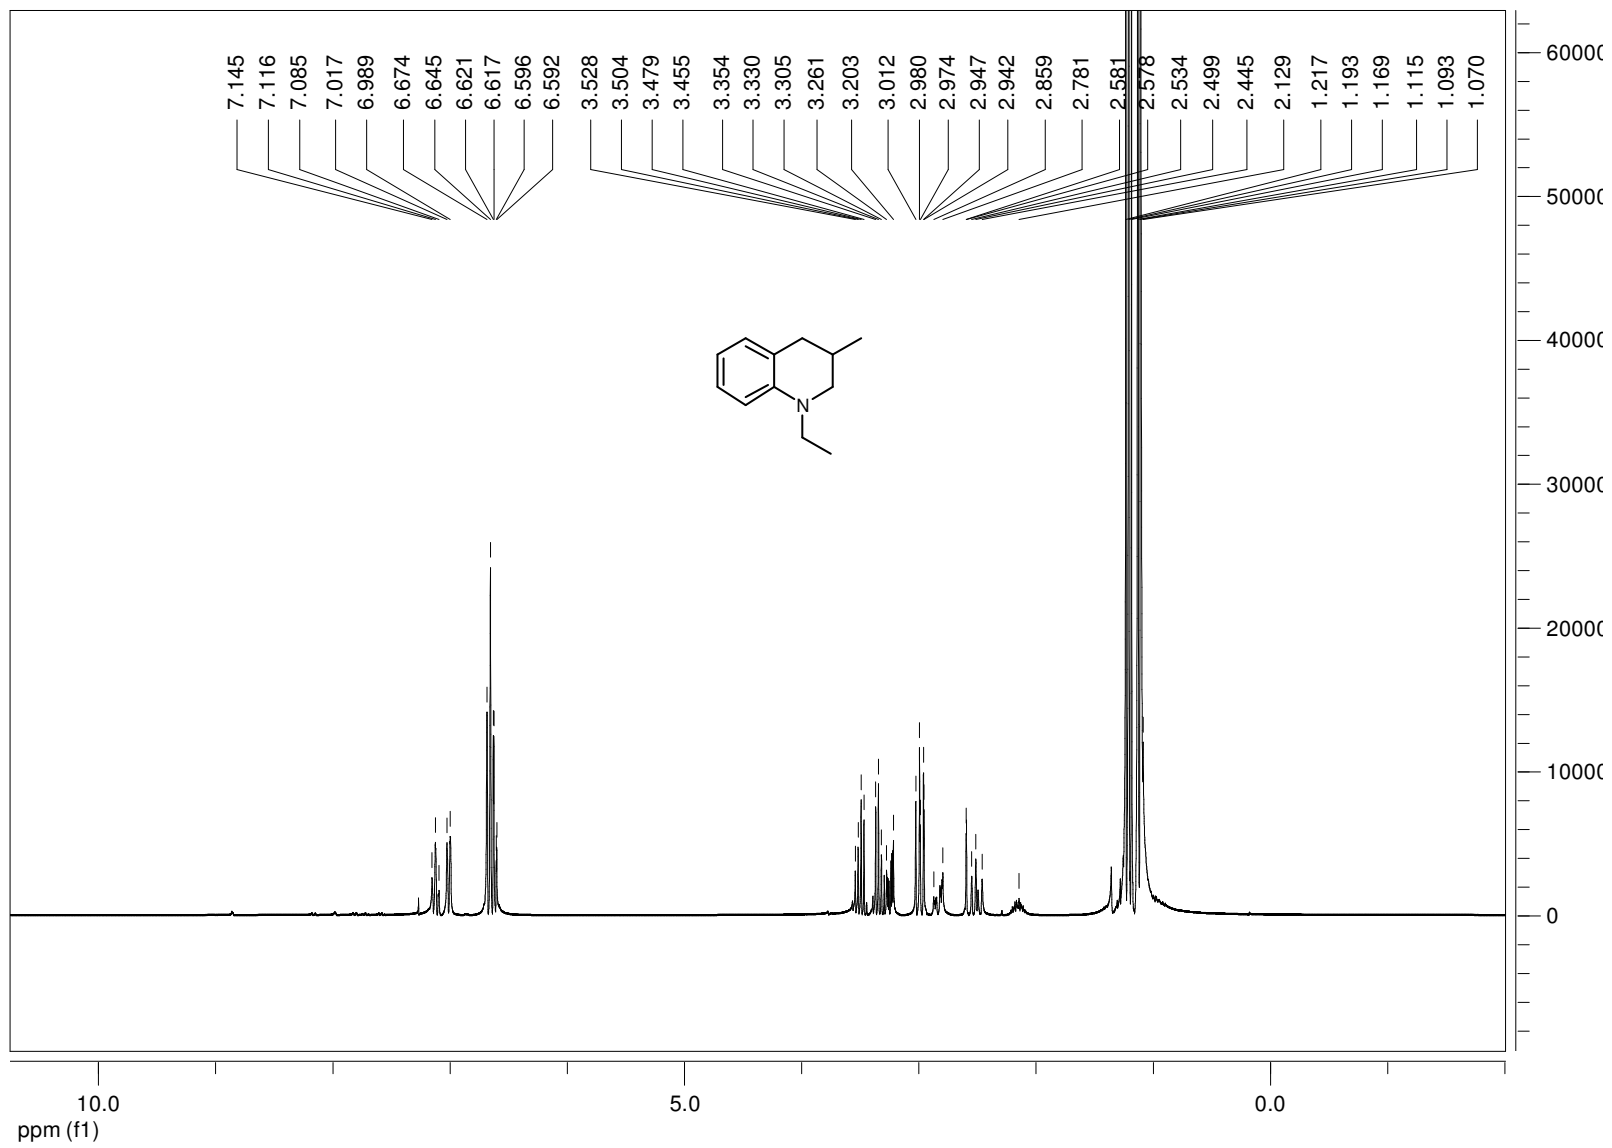

Compound **6b**

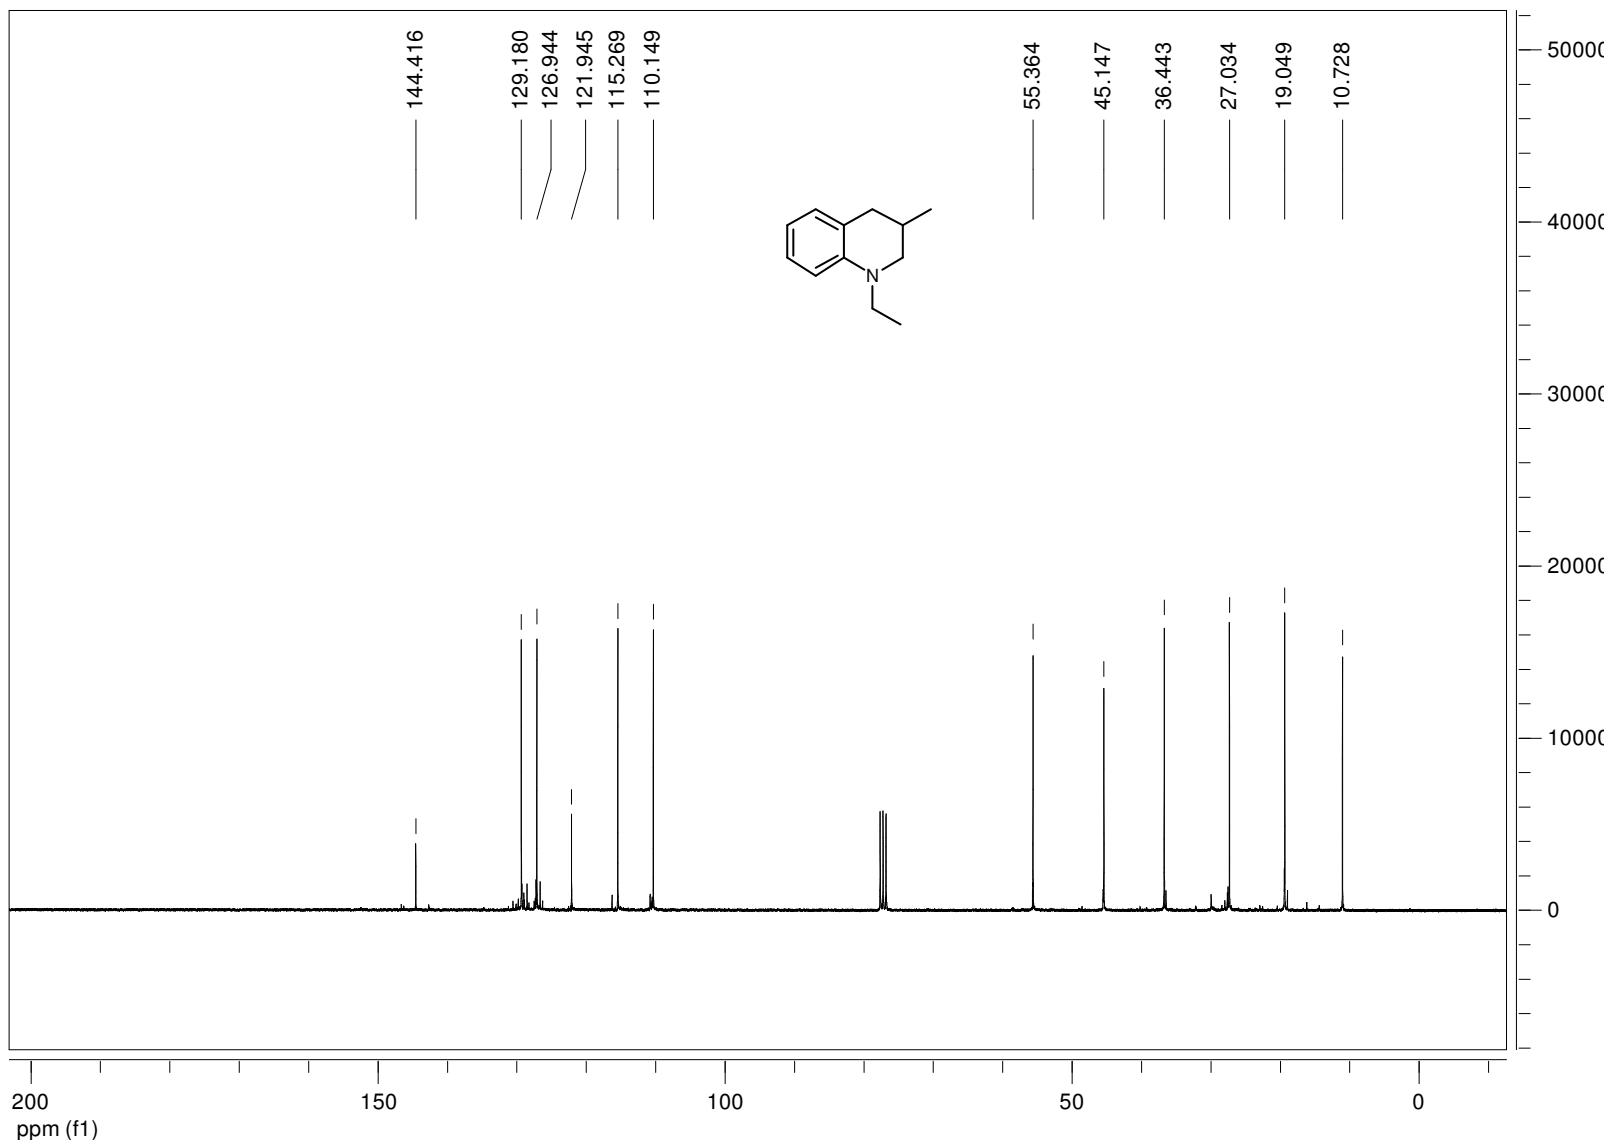

Compound **6c**

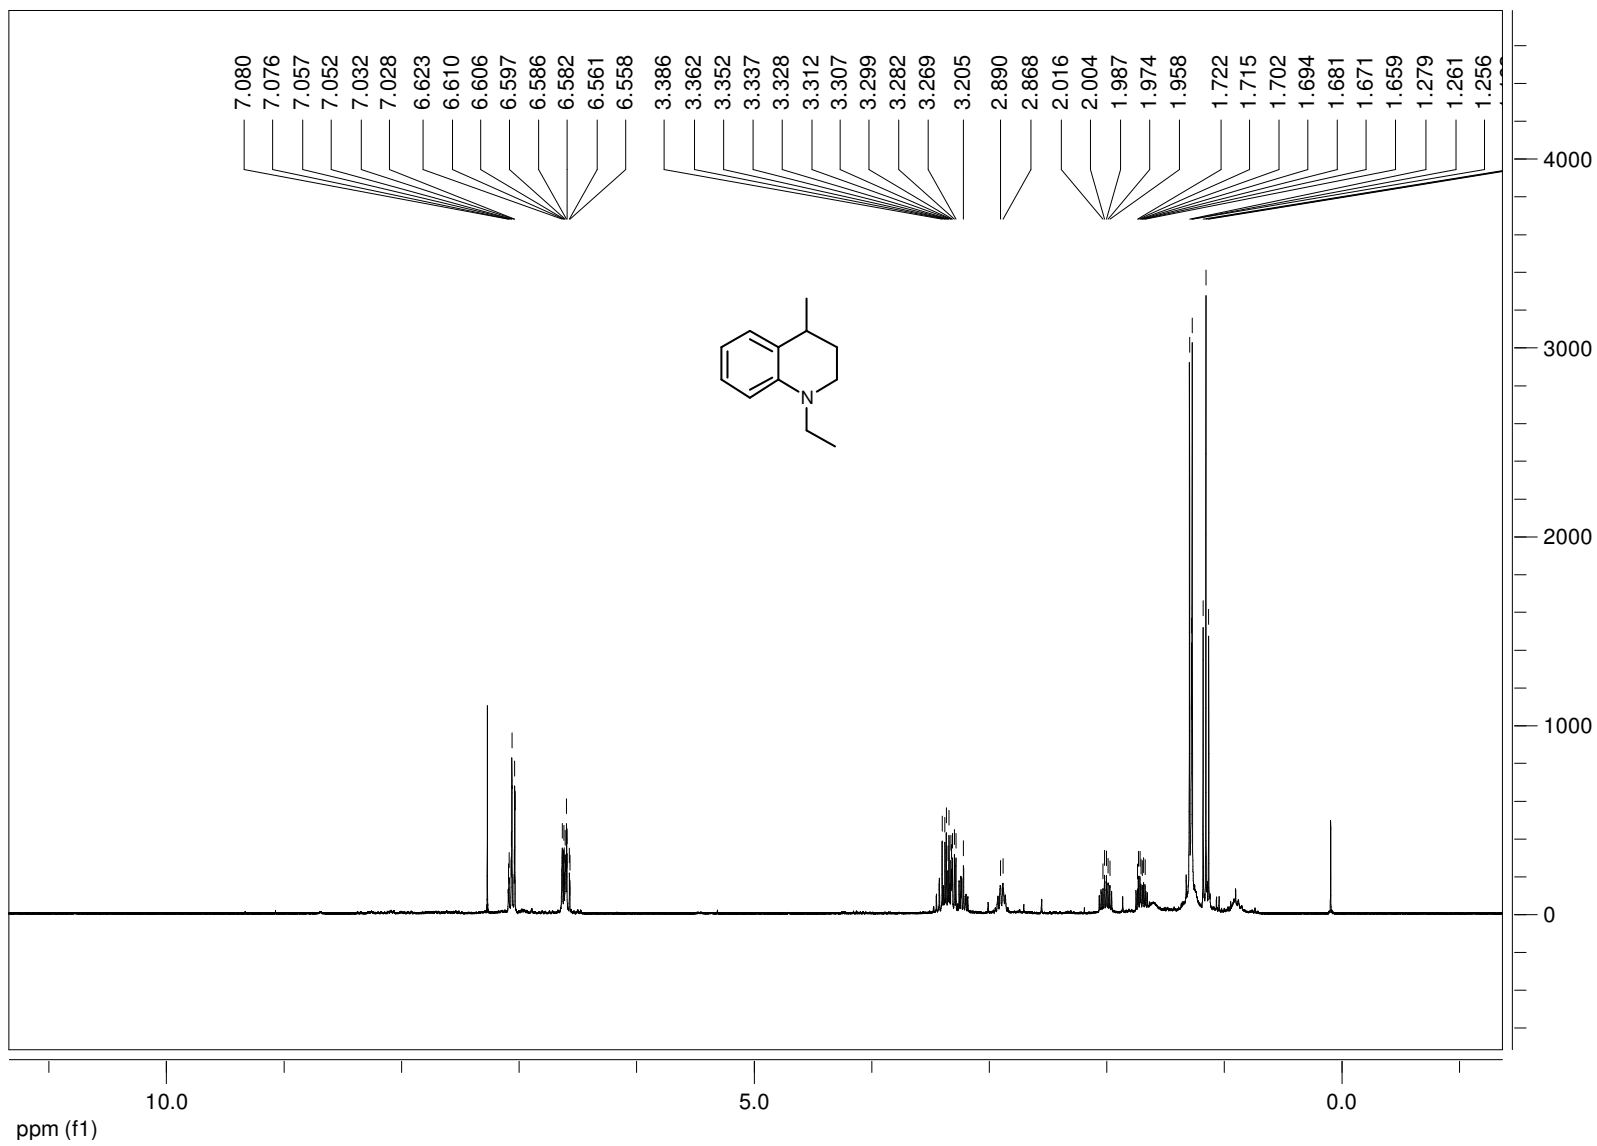

Compound **6c**

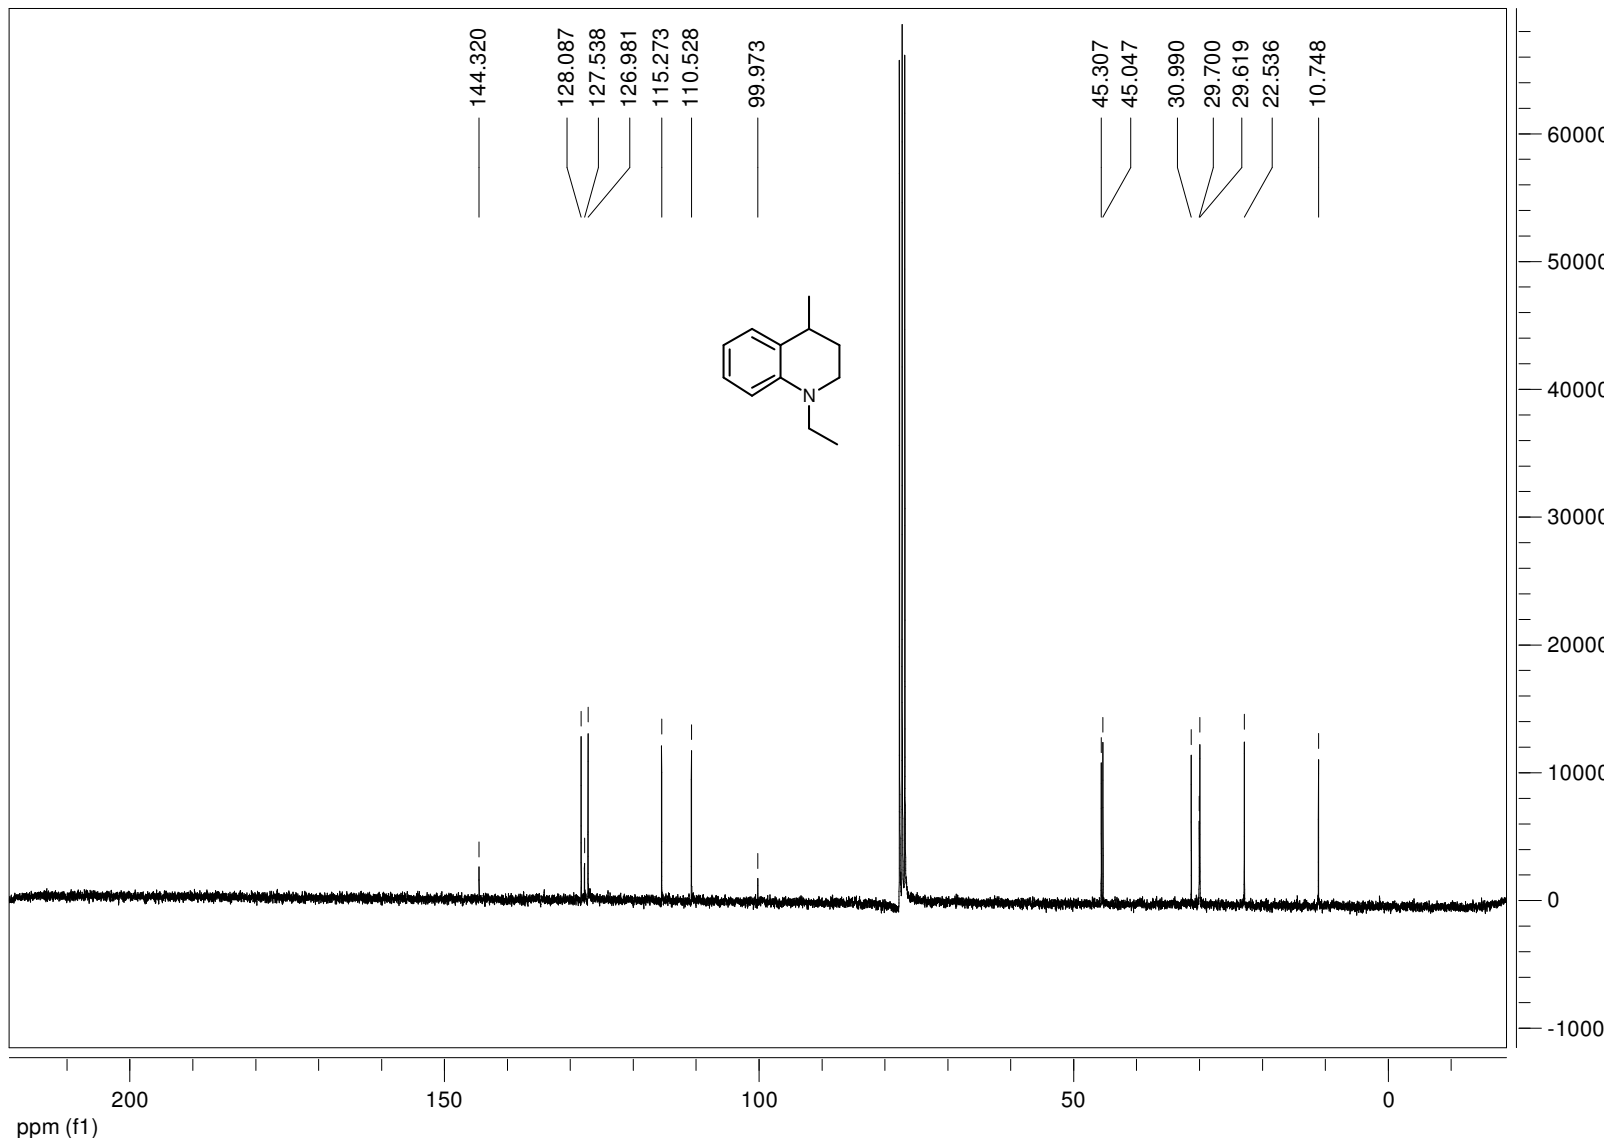

Compound **6d**

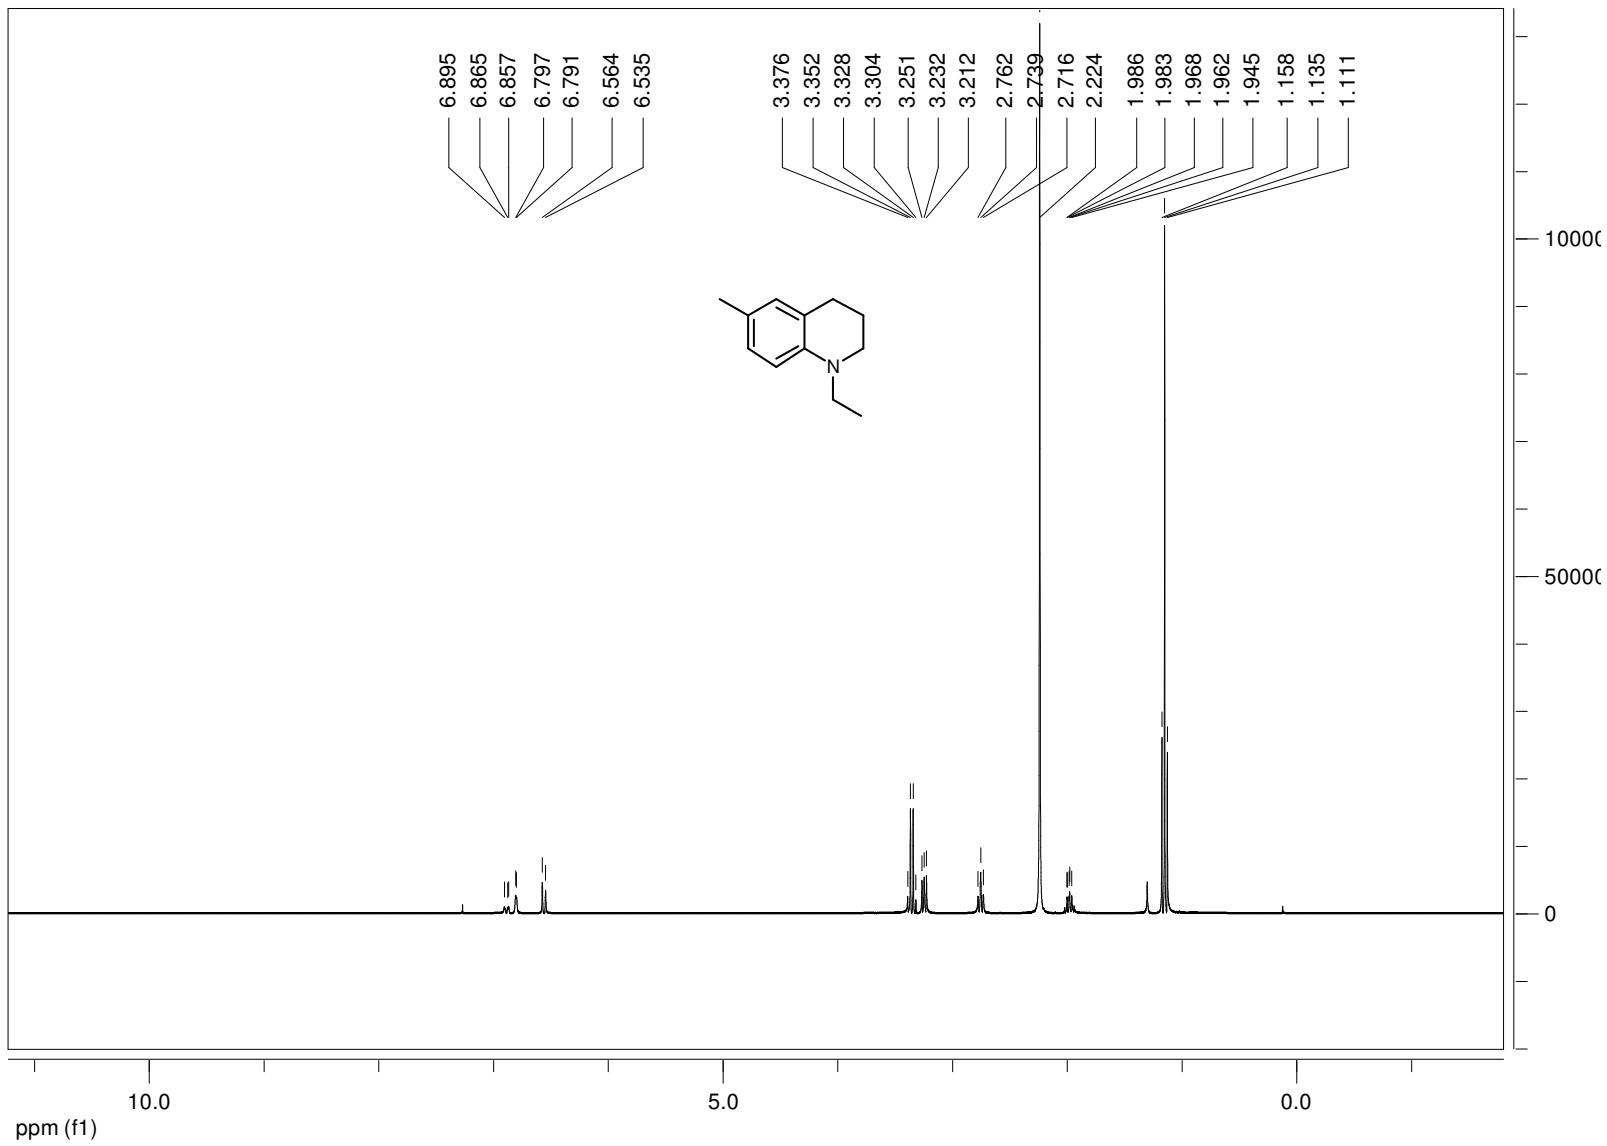

Compound **6d**

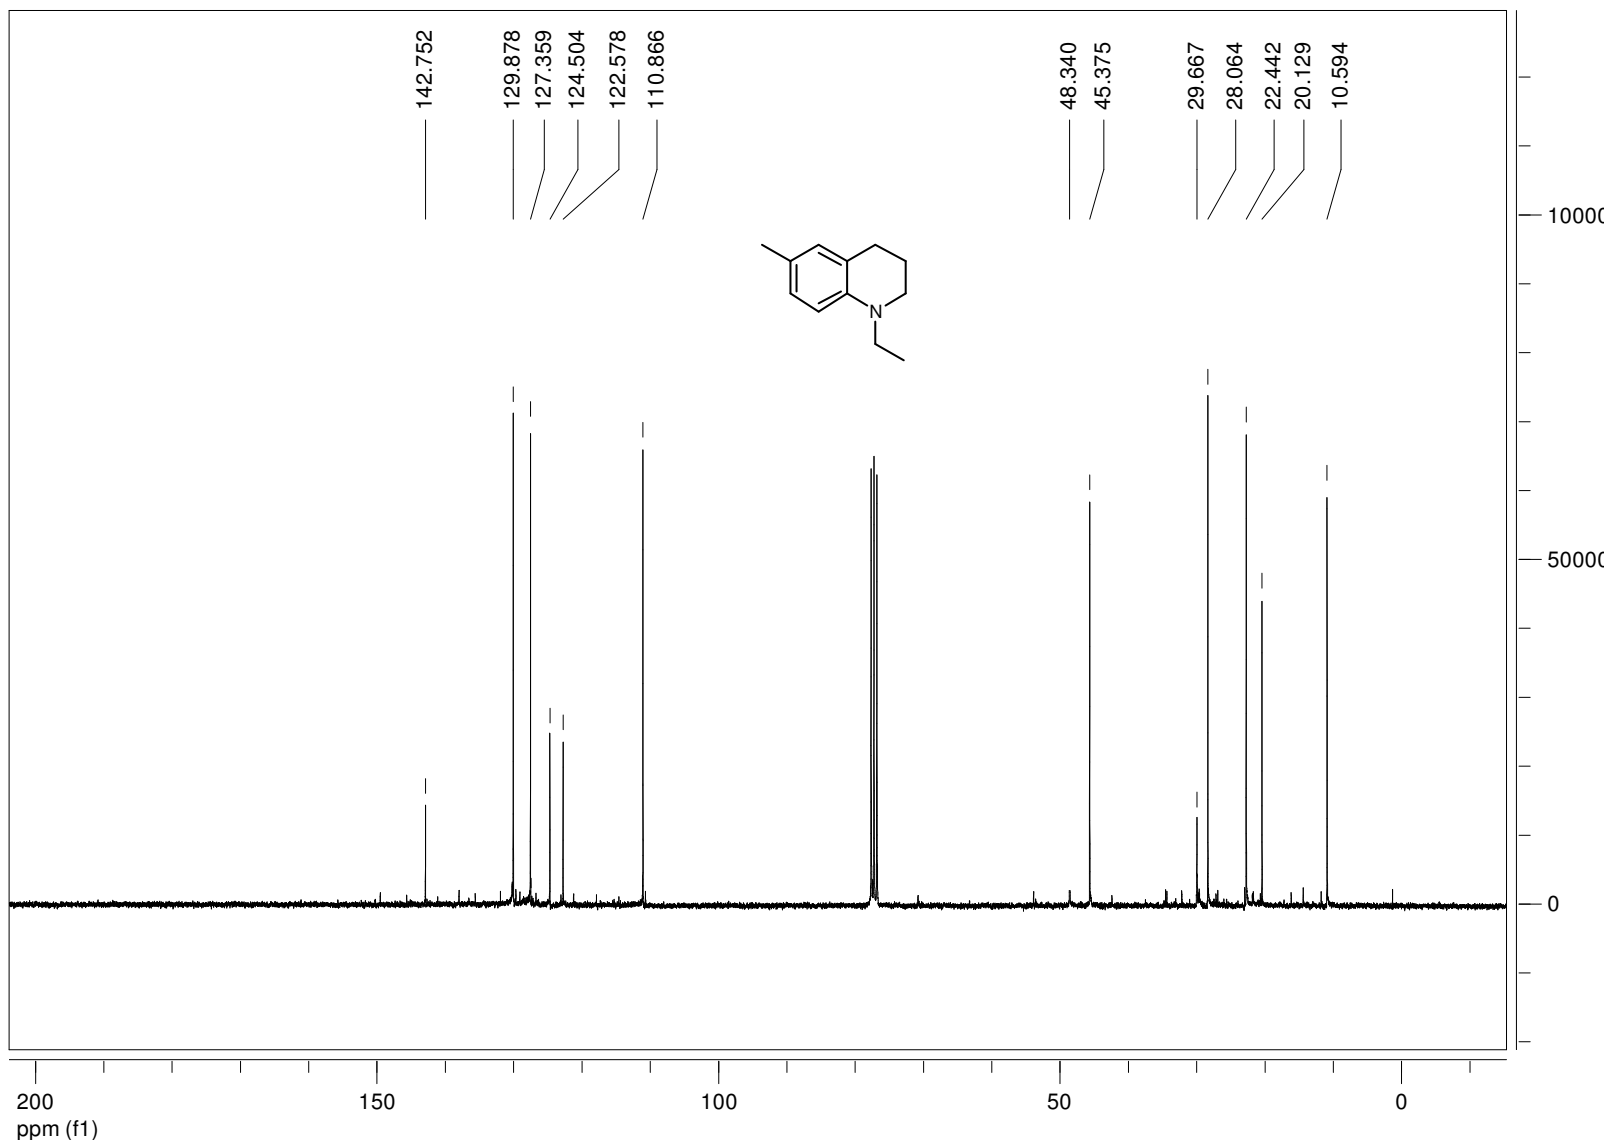



Compound **6e**

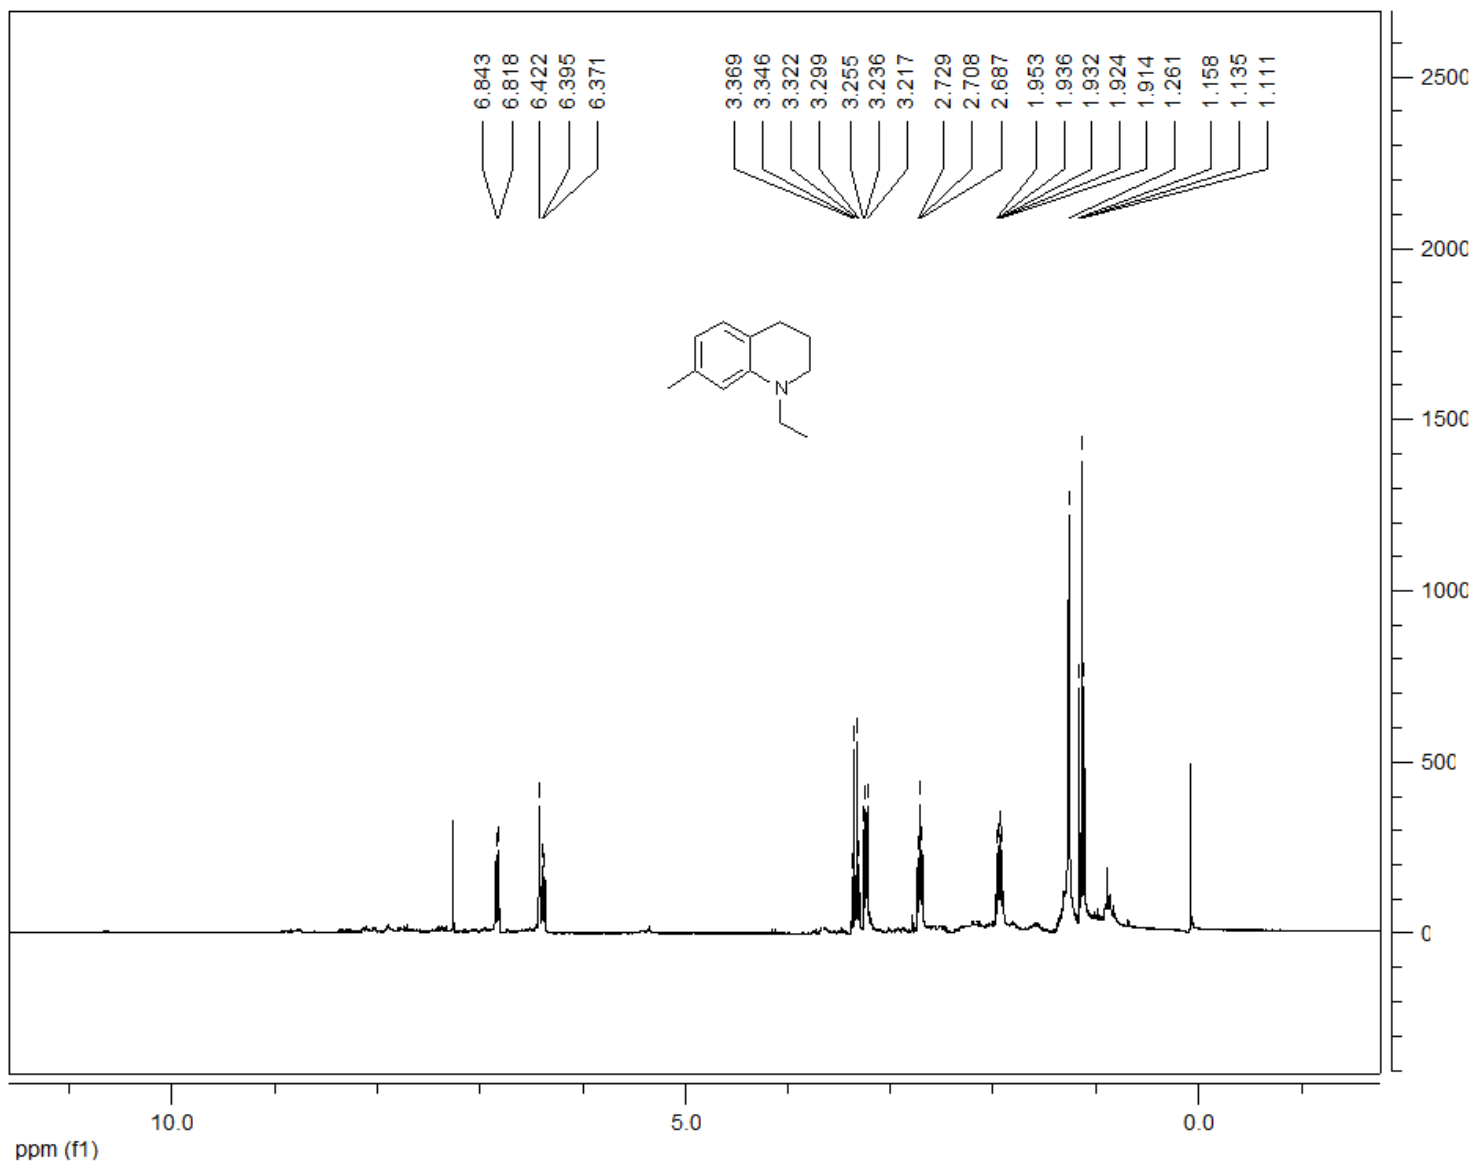

Compound **6e**

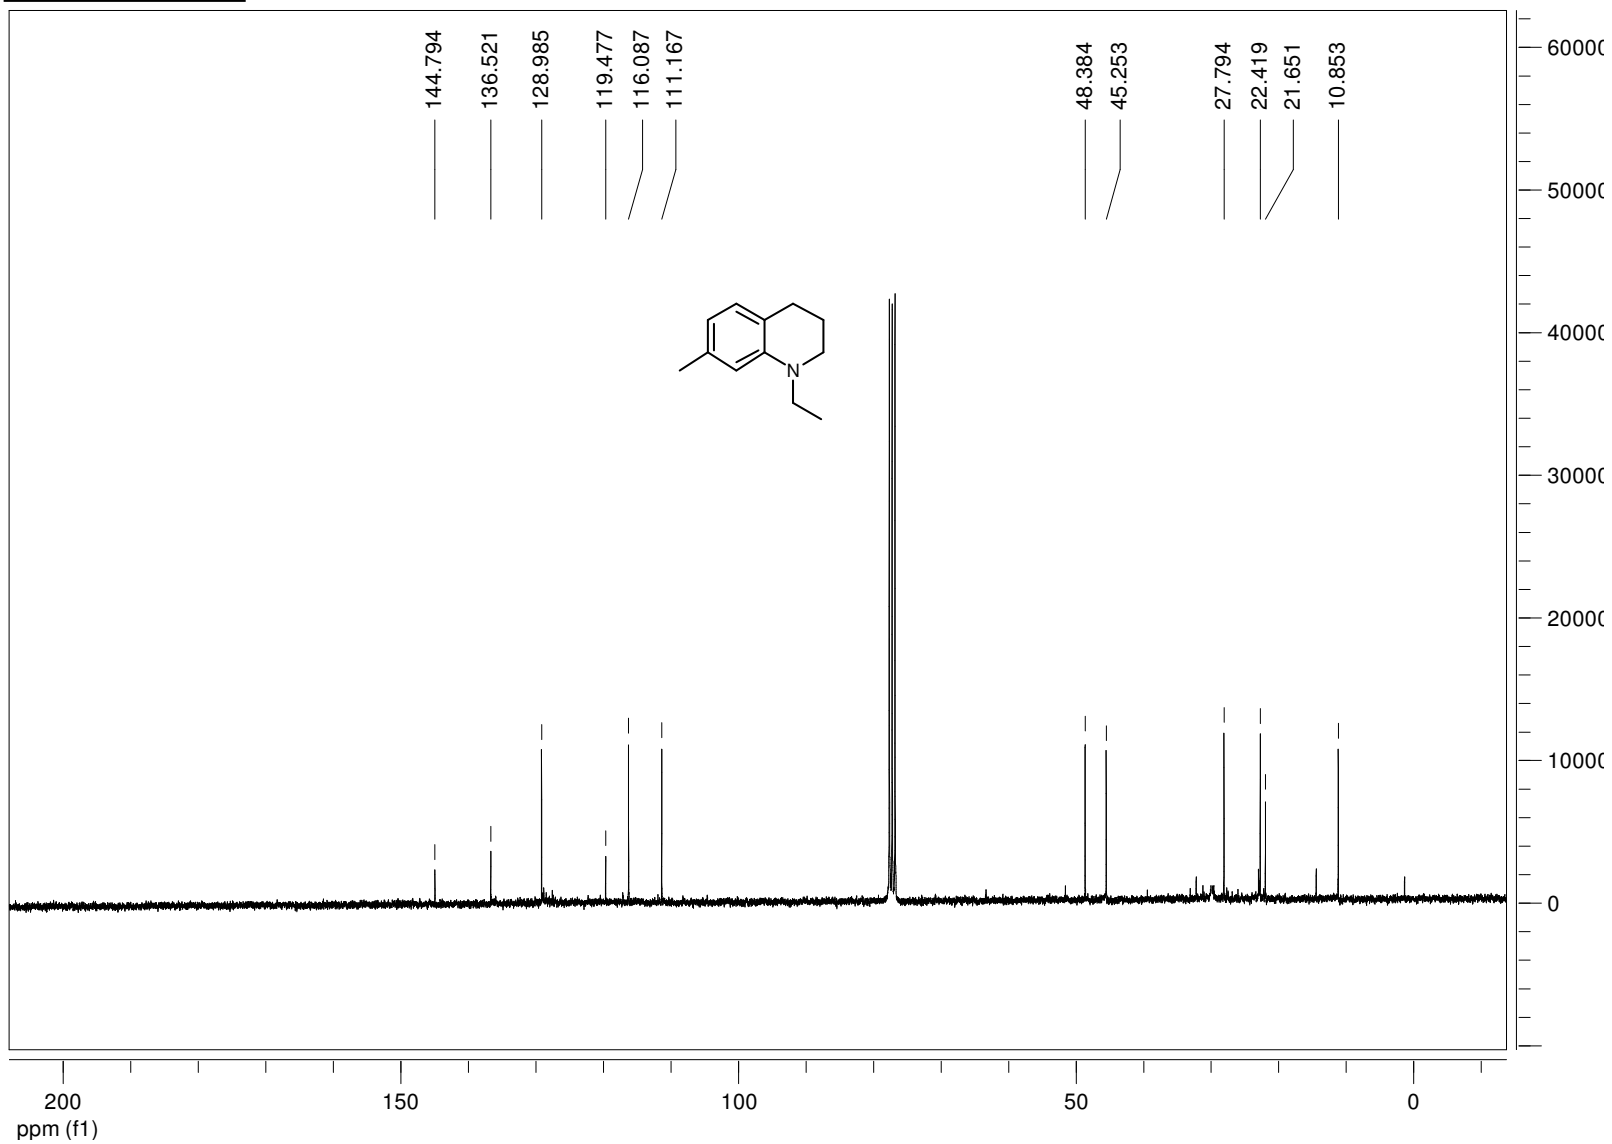

Compound **6f**

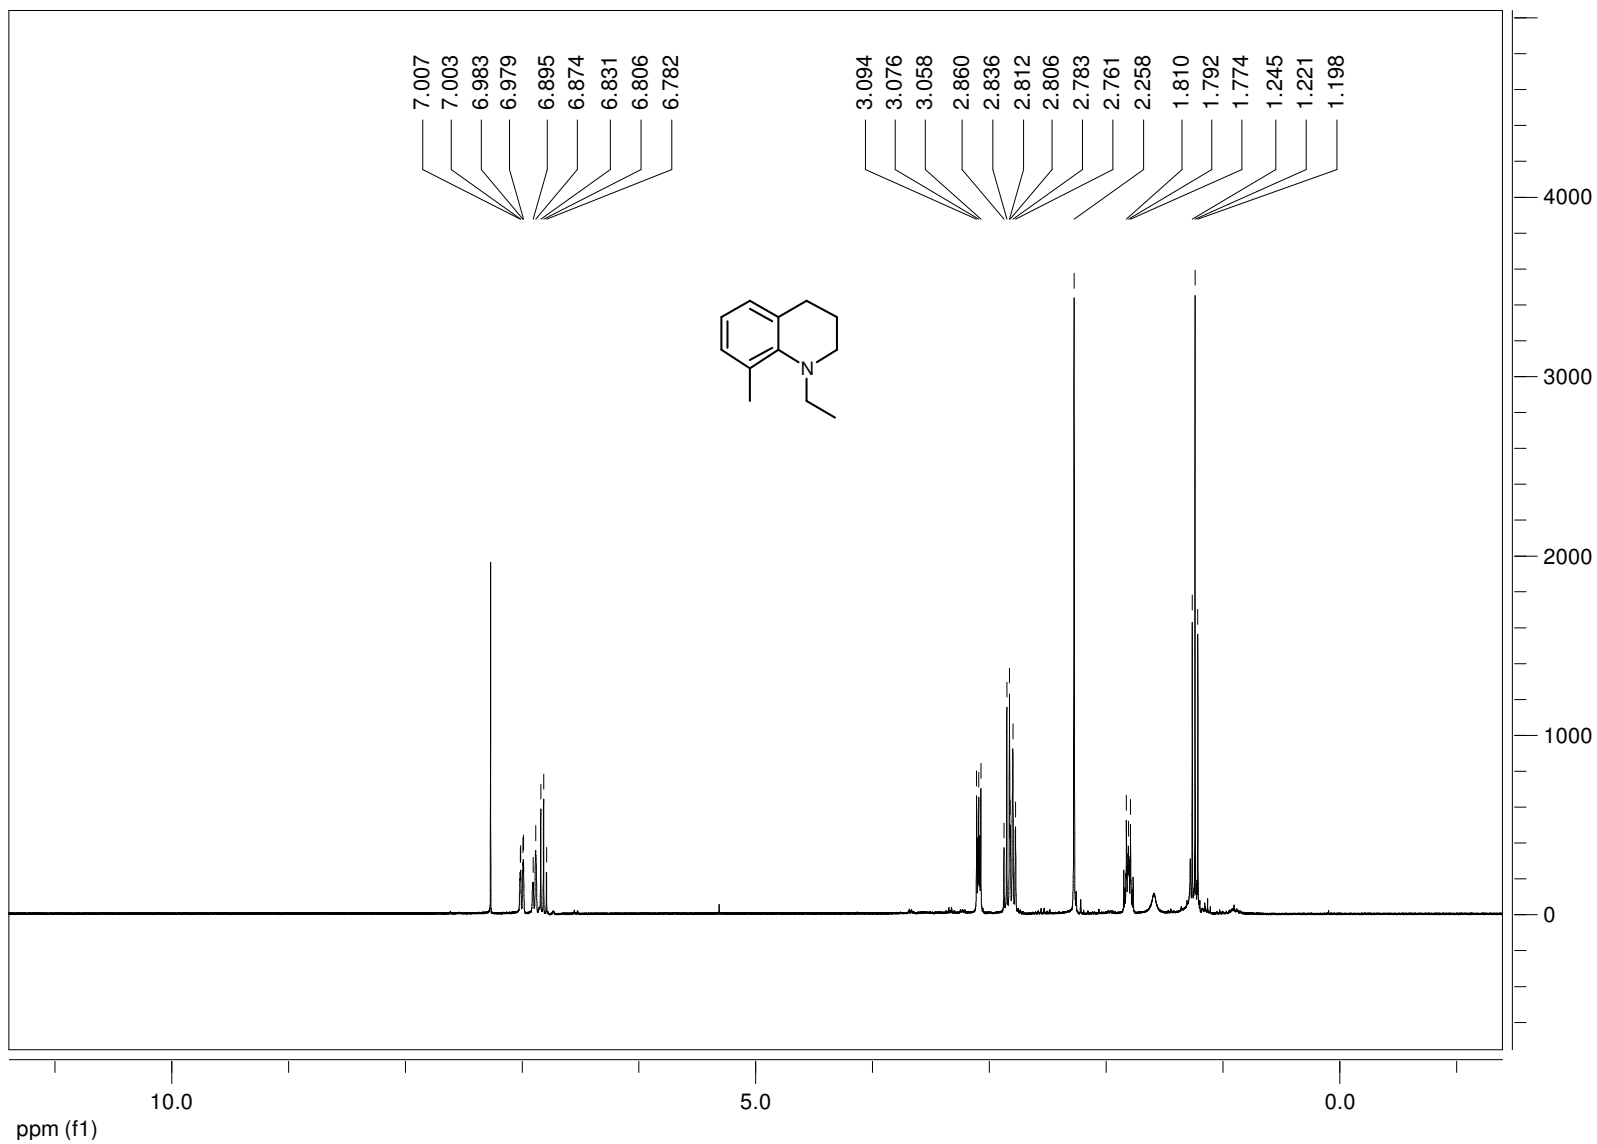

Compound **6f**

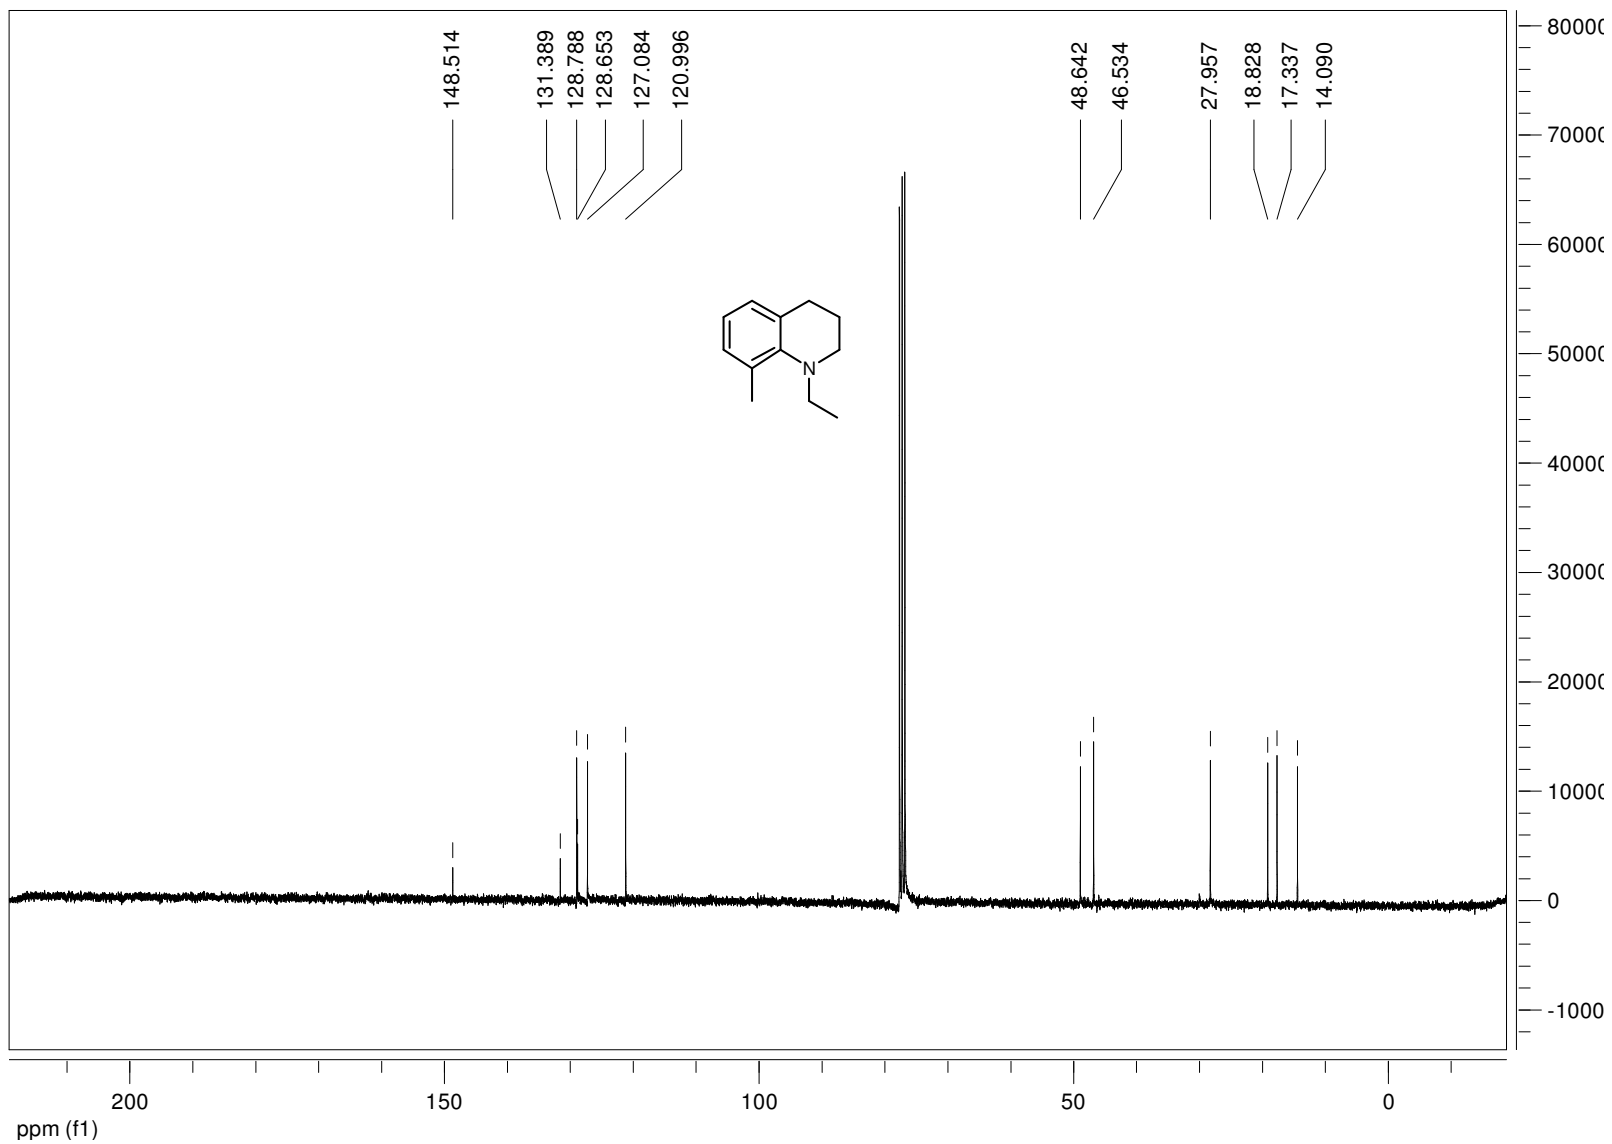

Compound **7b**

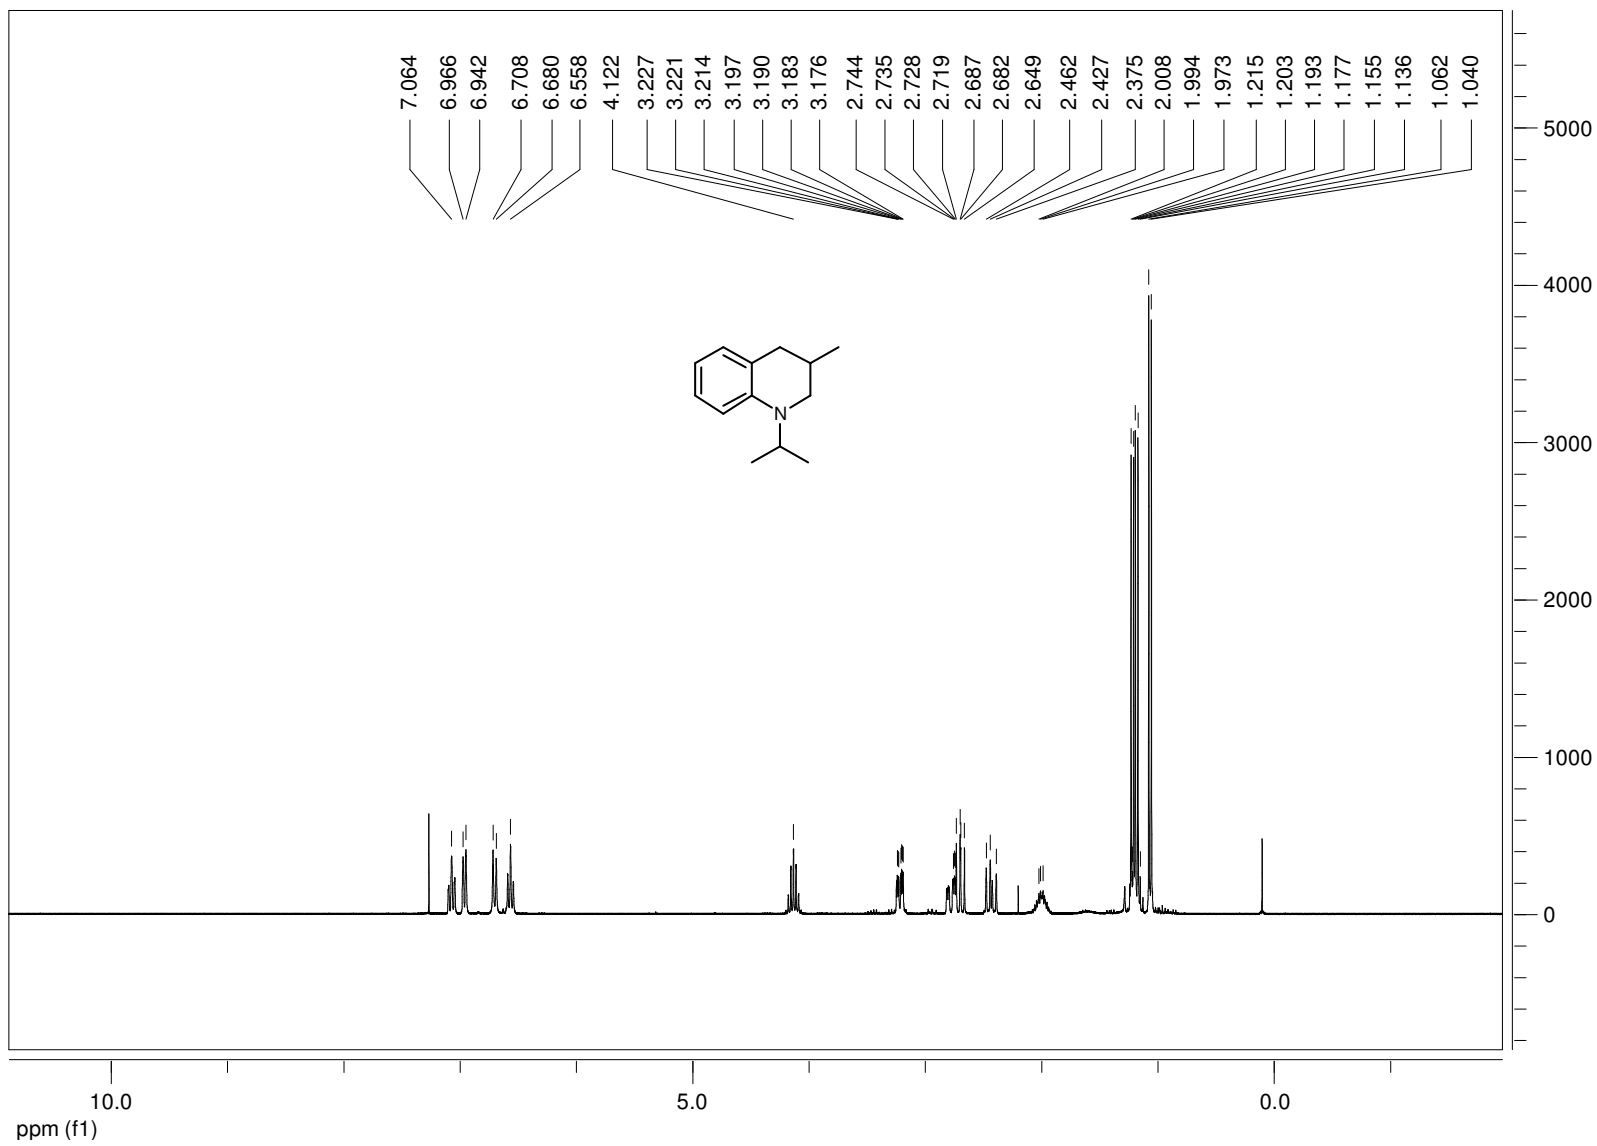

Compound **7b**

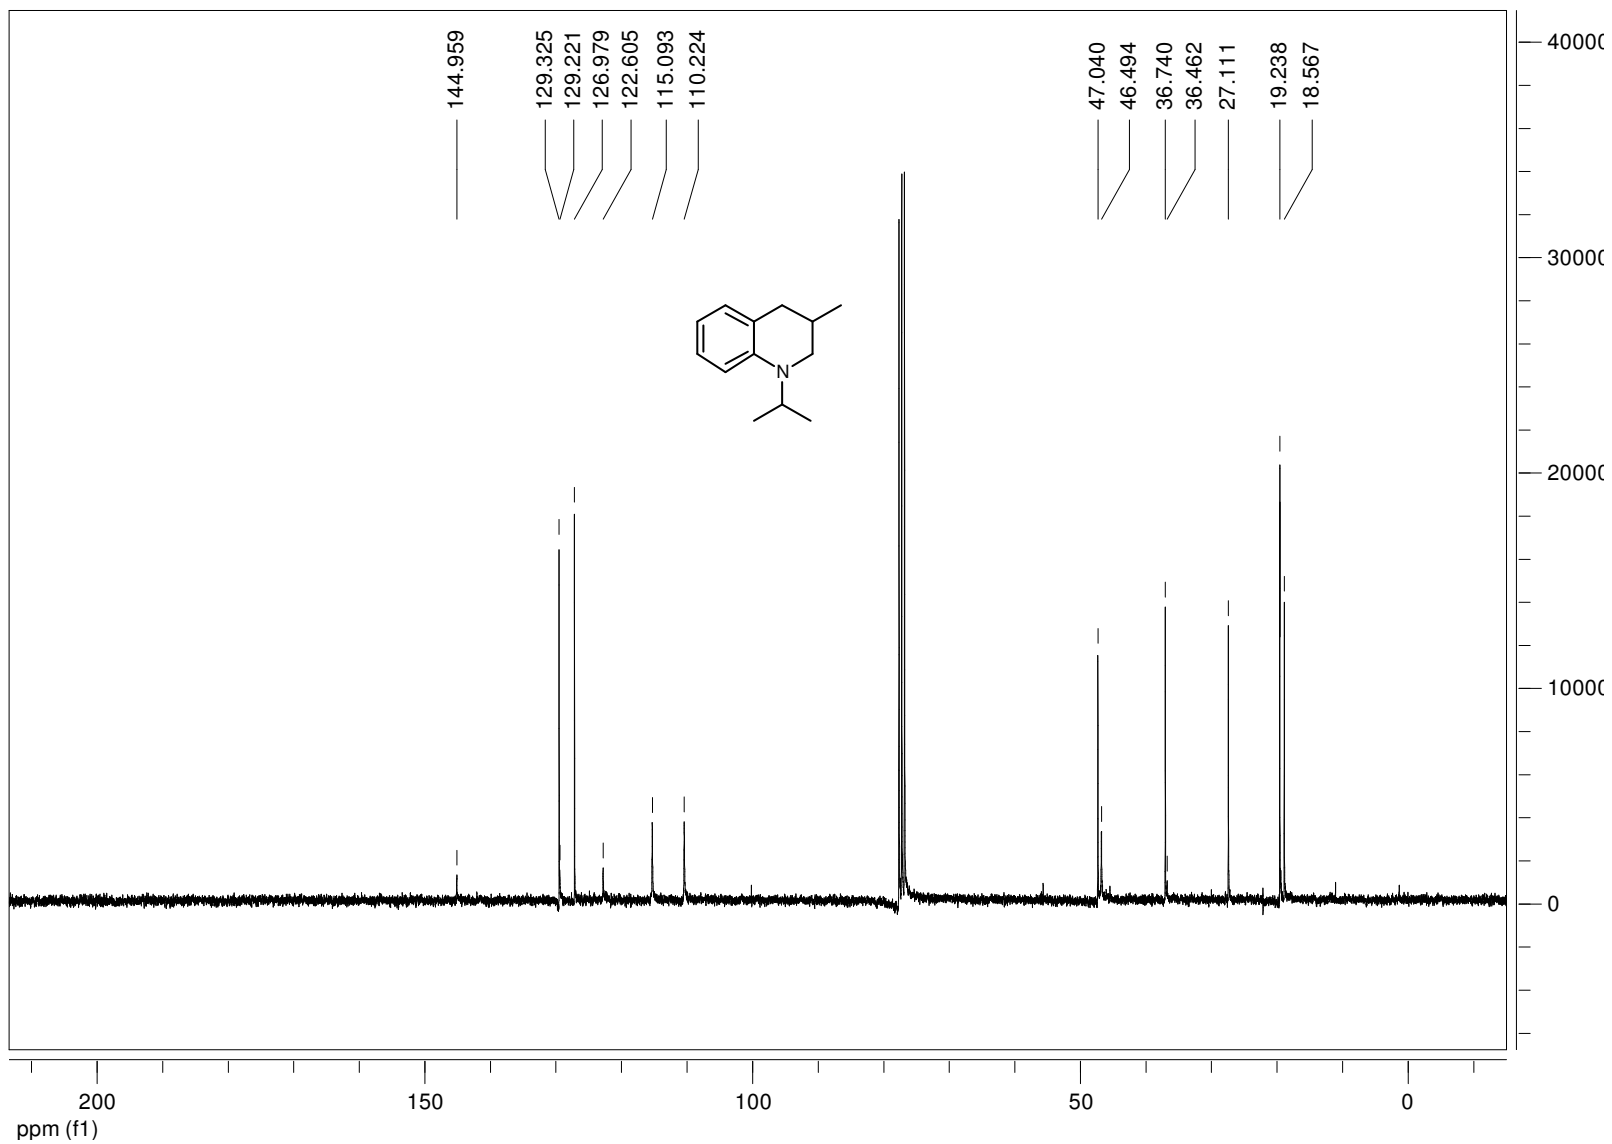

Compound **7c**

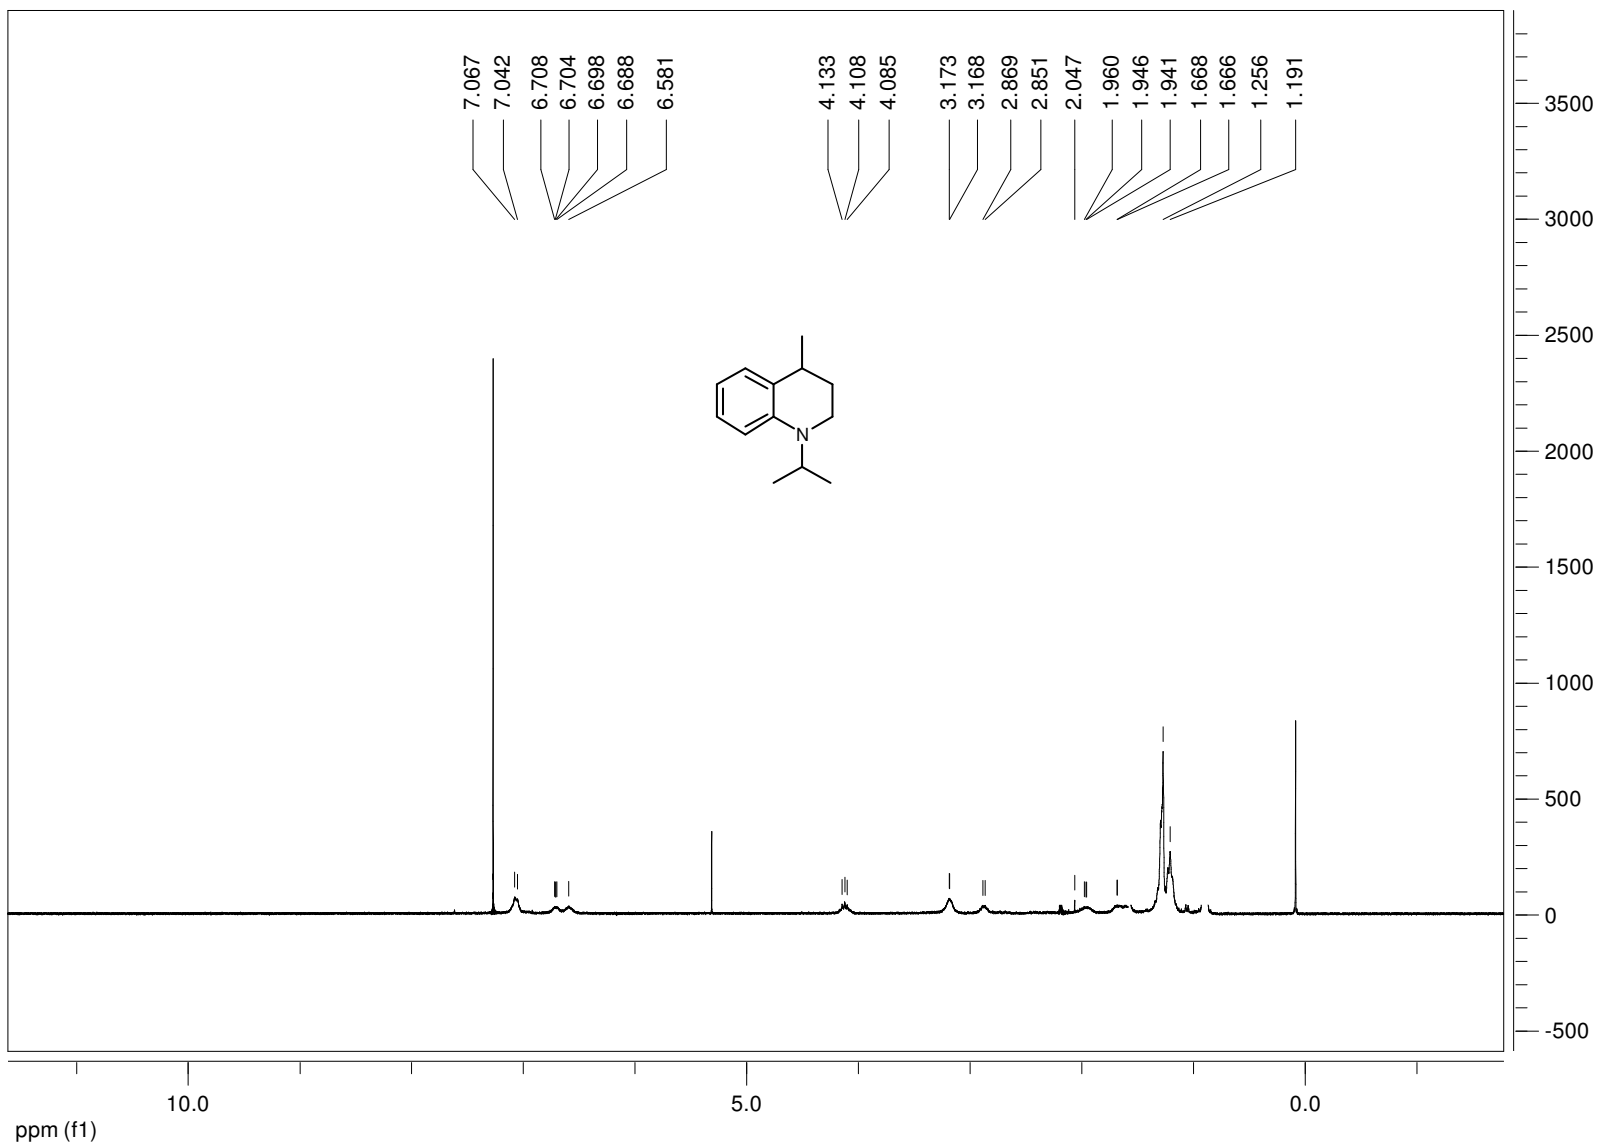

Compound **7d**

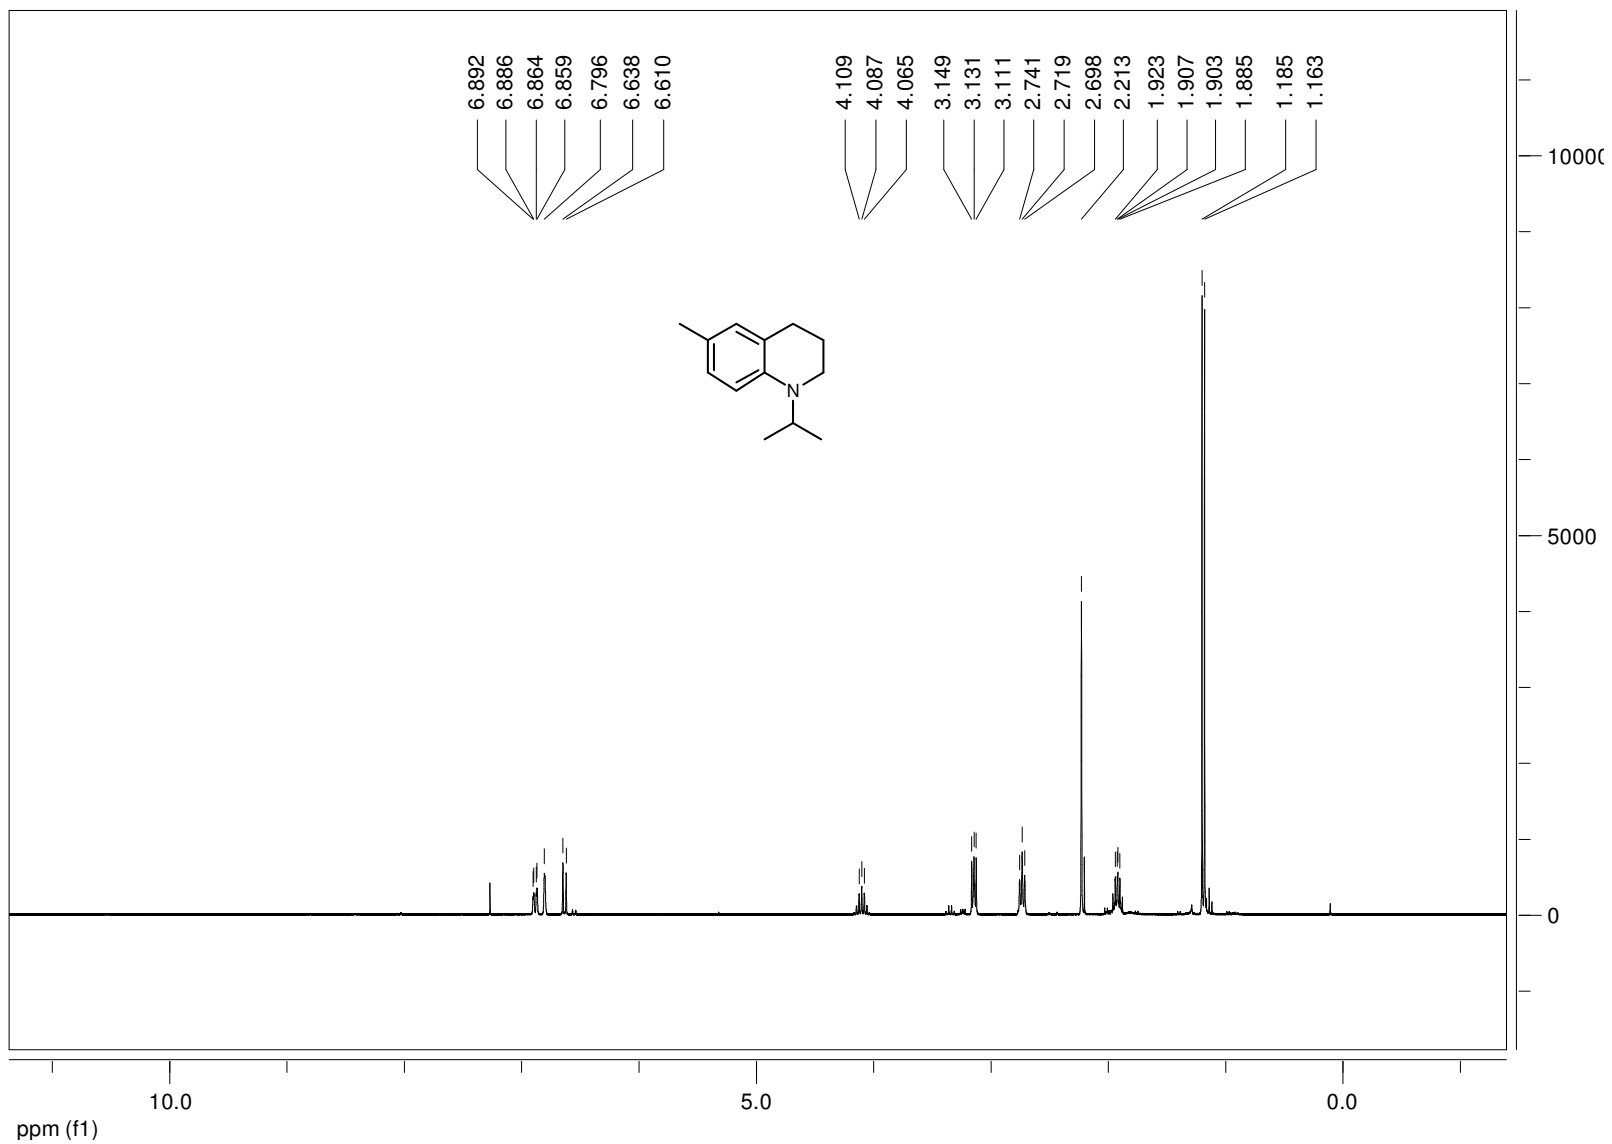



Compound **7d**

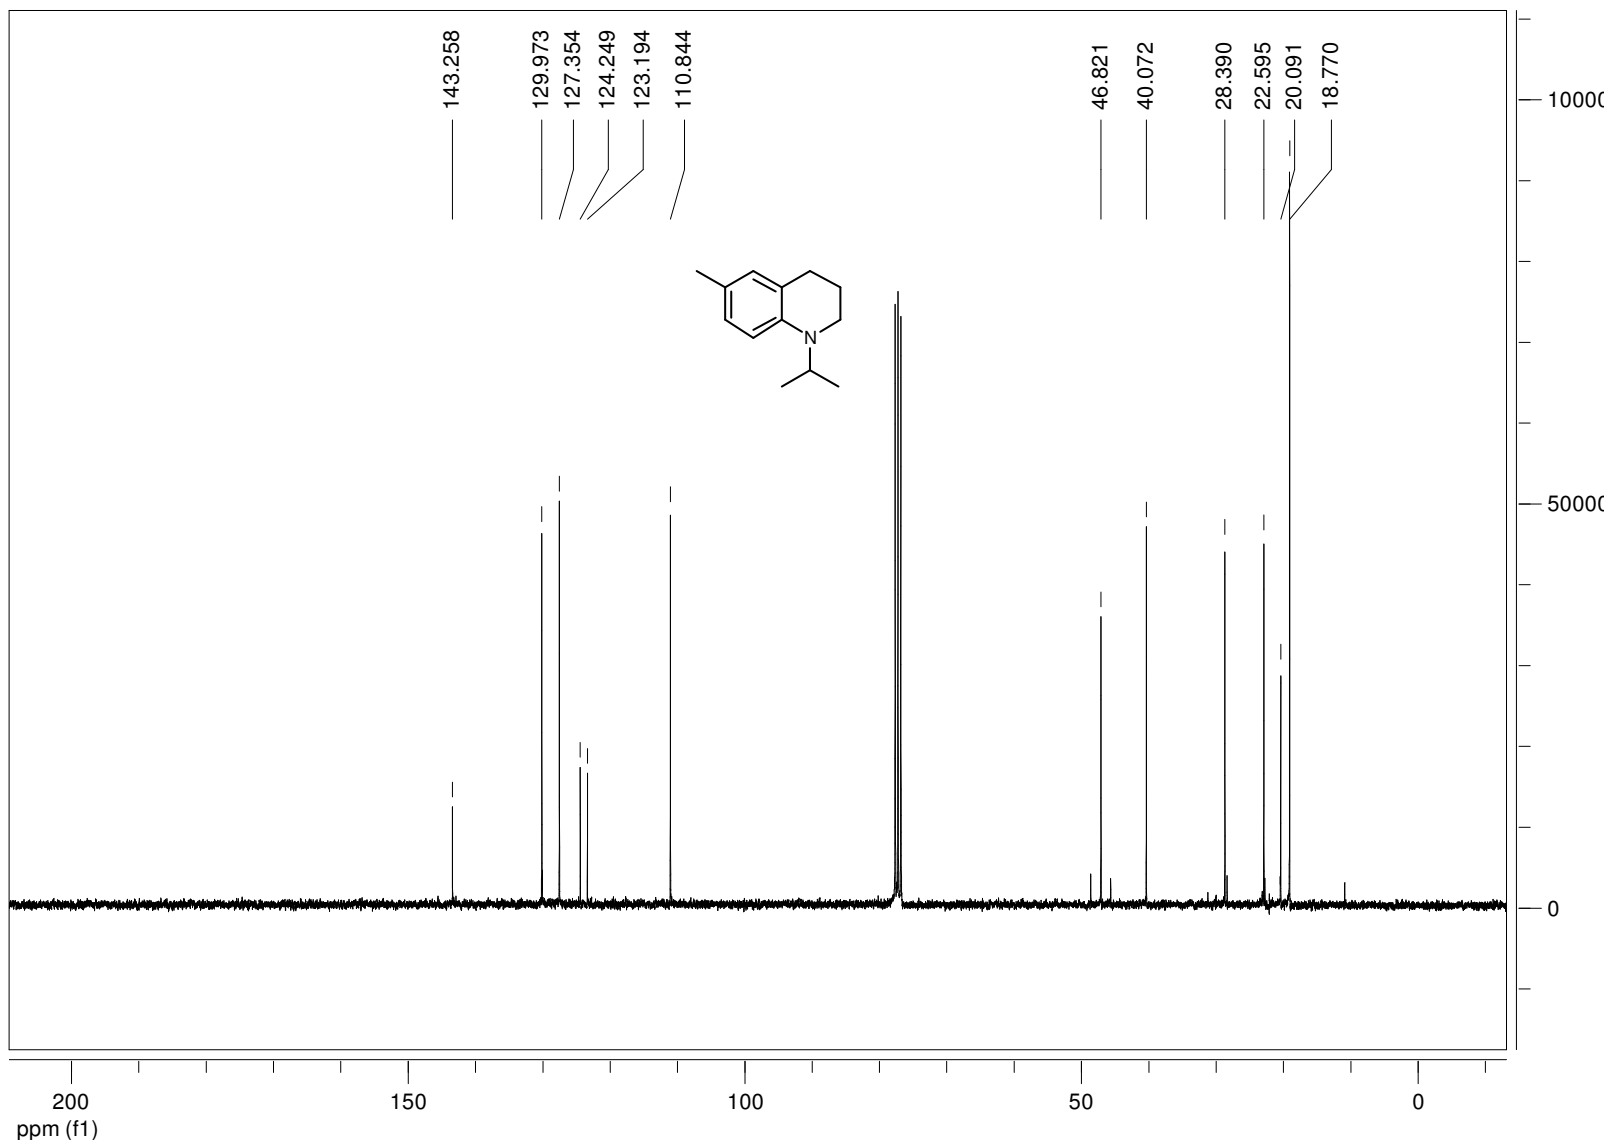

Compound 7e

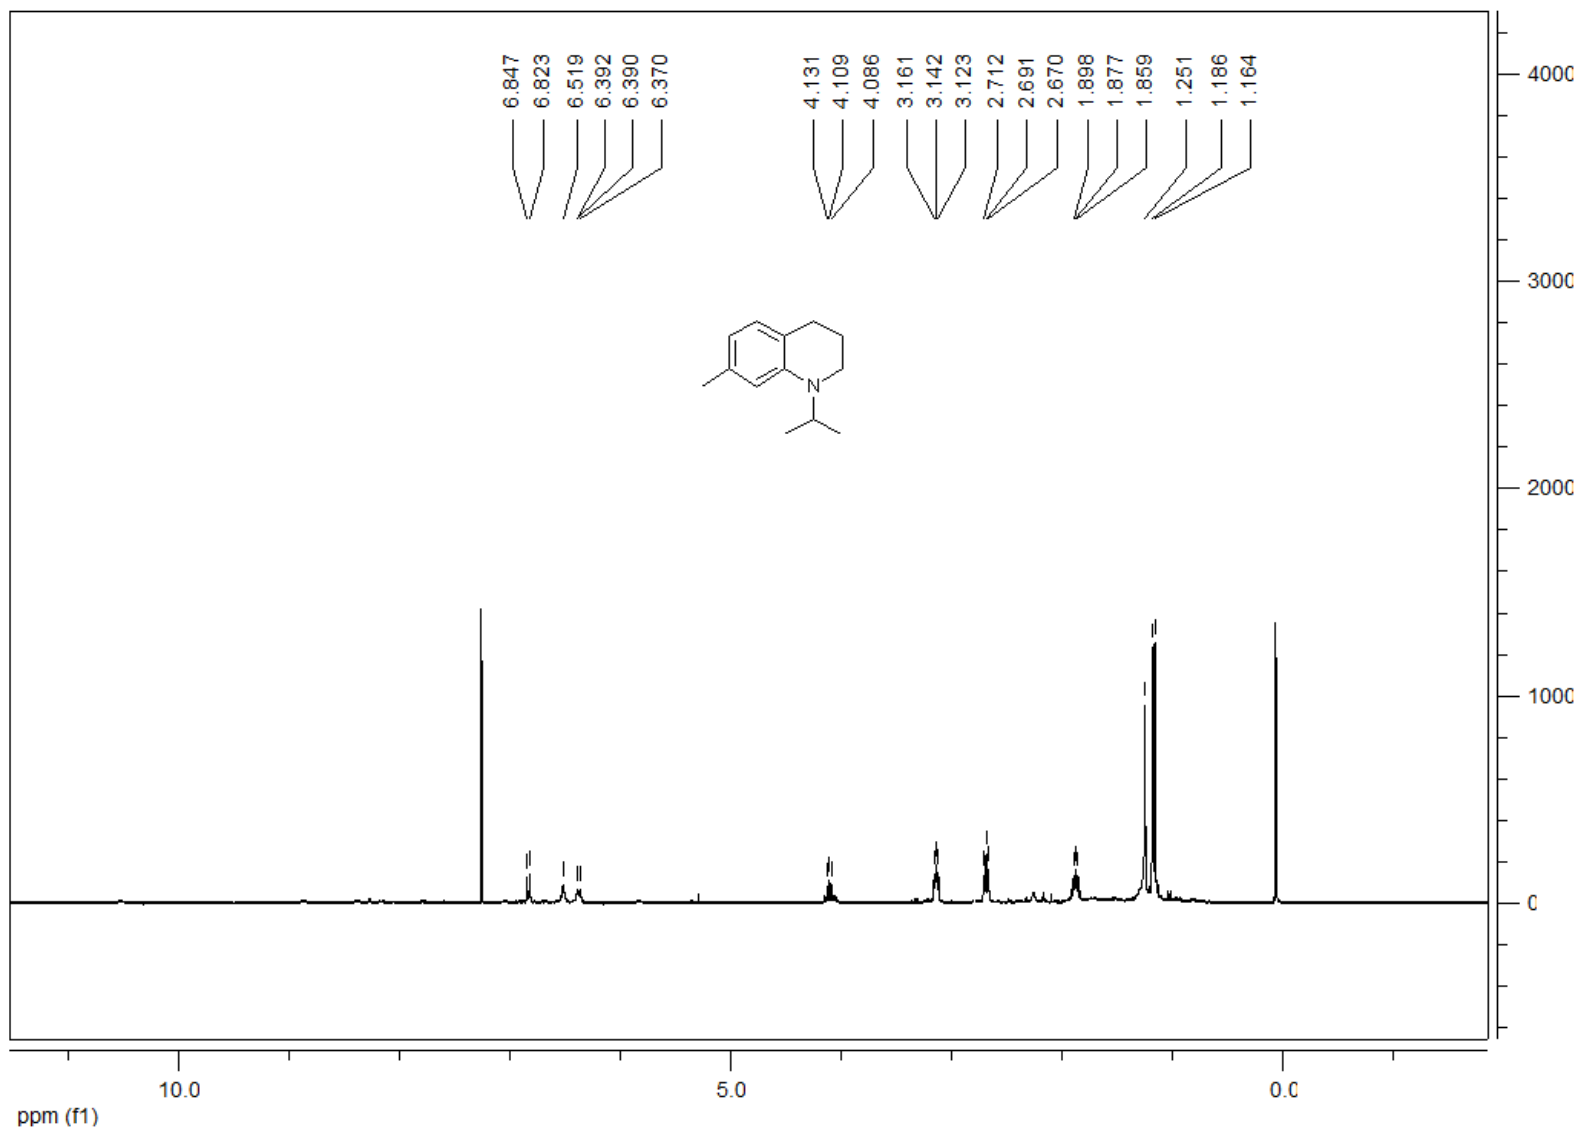

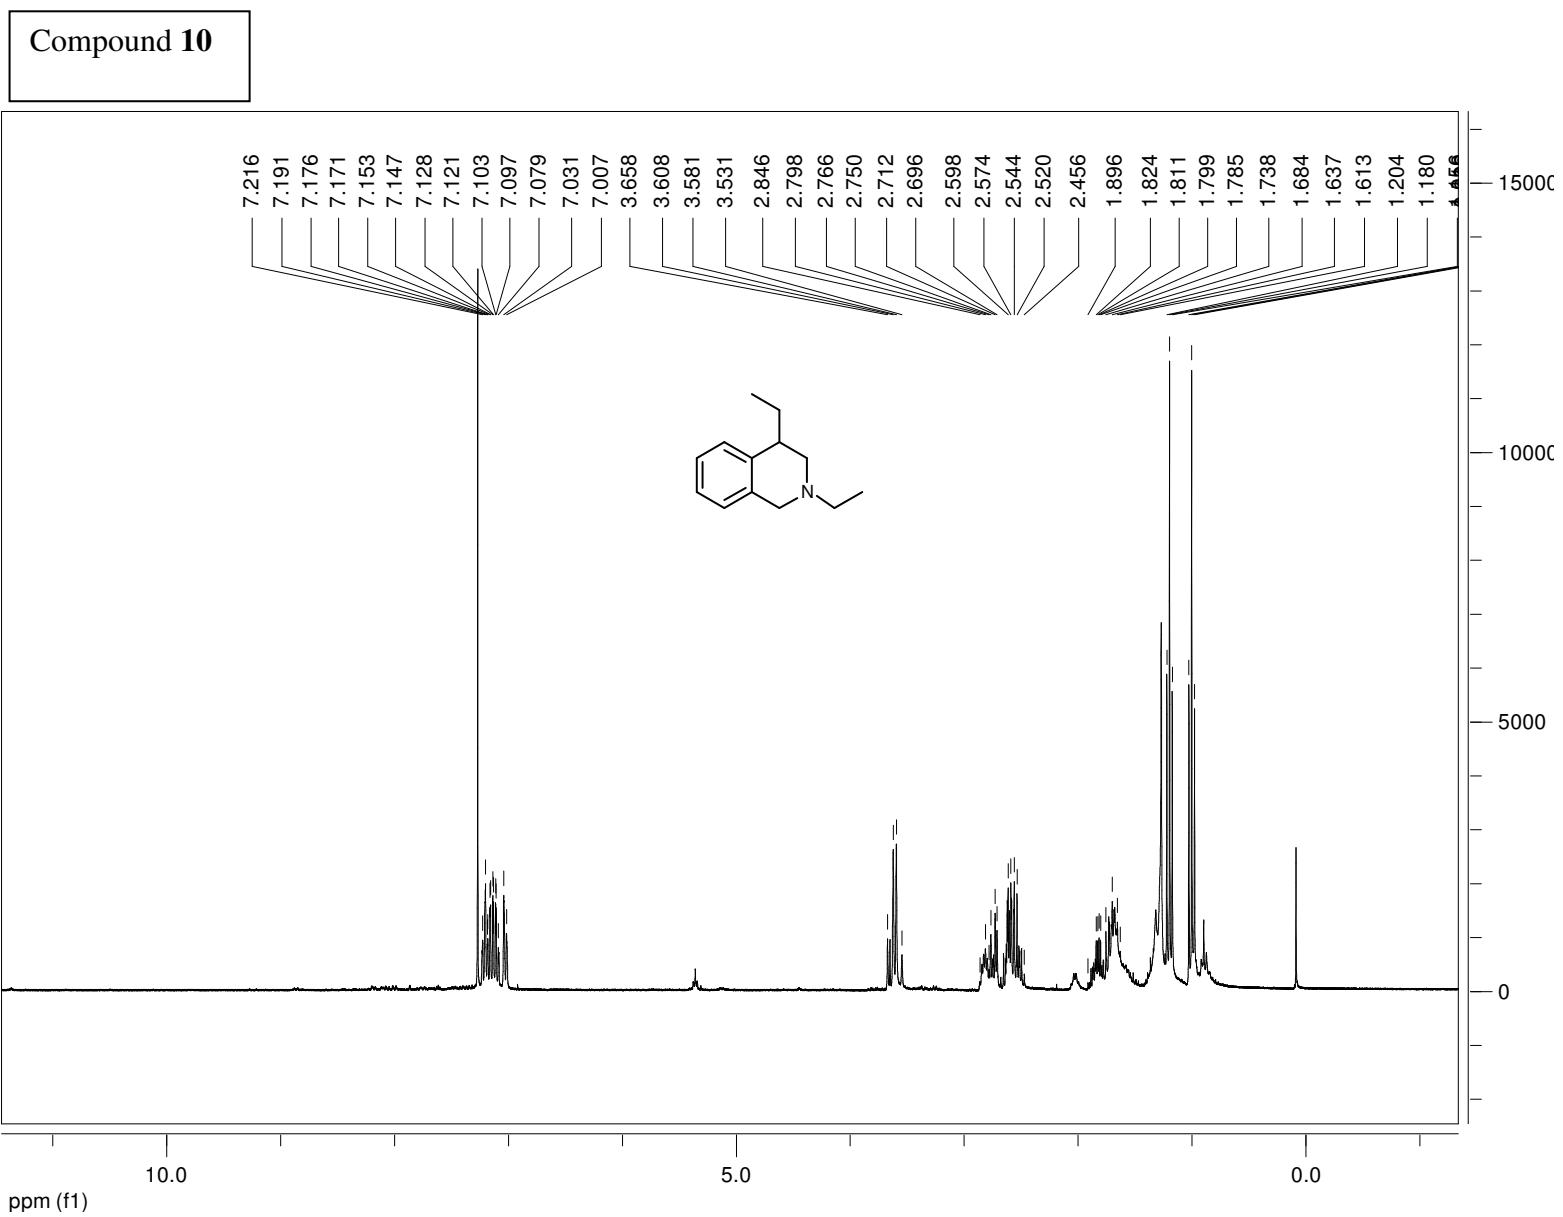

Compound **10**

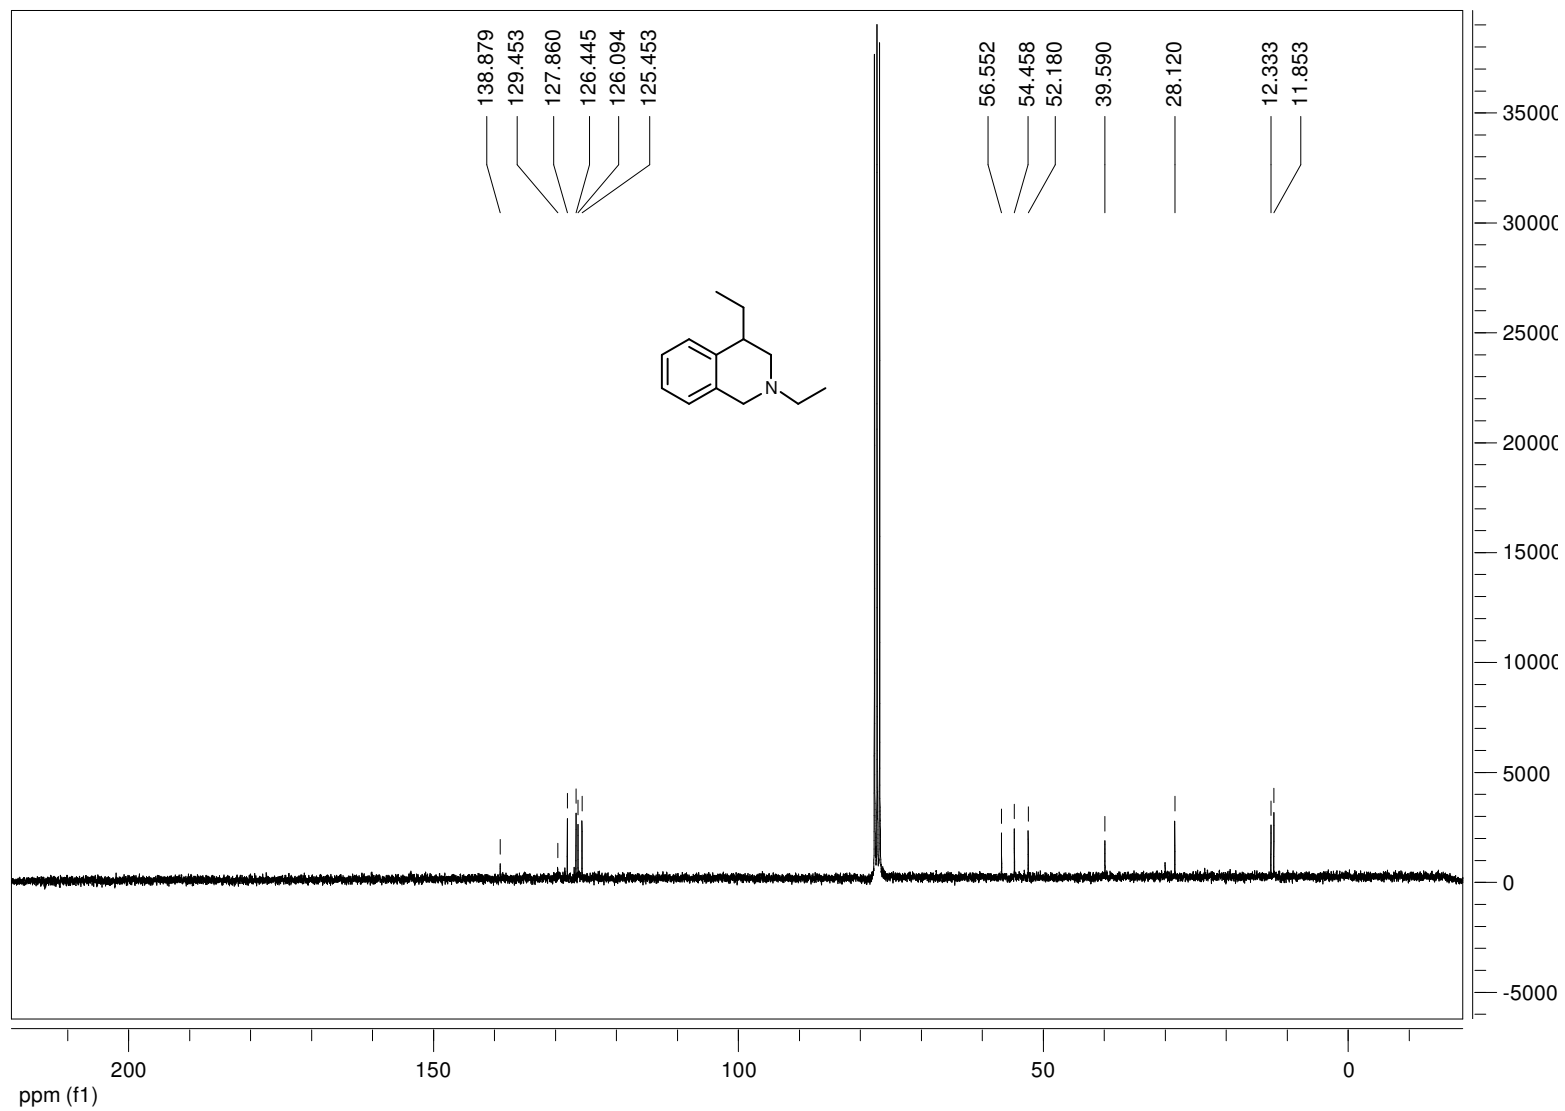

#### 4. Spectra of acetone detection experience.

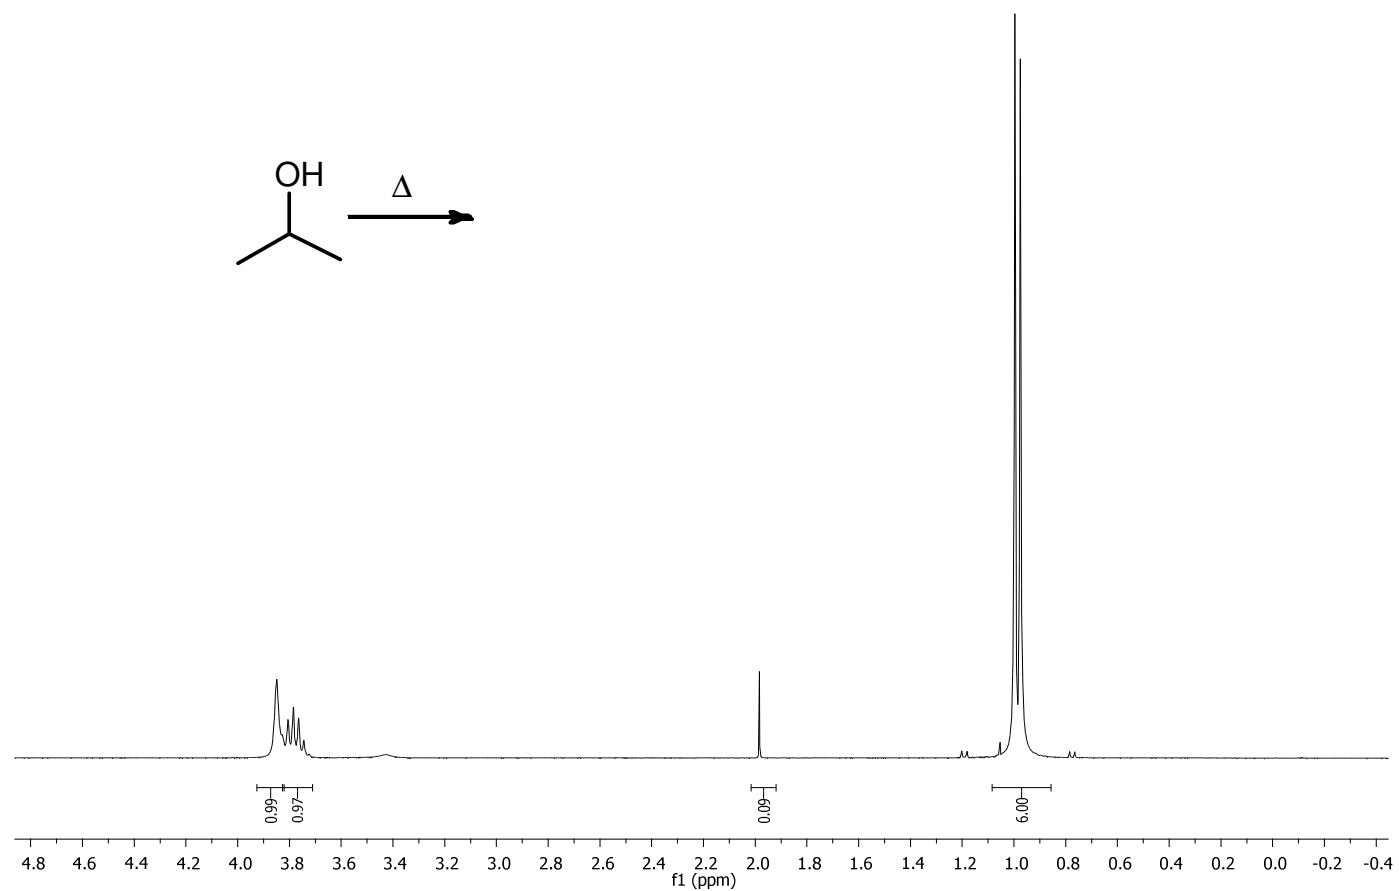

$^1\text{H}$  NMR spectrum in  $\text{CDCl}_3$  of the resulting mixture isopropanol/acetone after heating isopropanol at  $150^\circ\text{C}$  during  $24^\circ\text{C}$

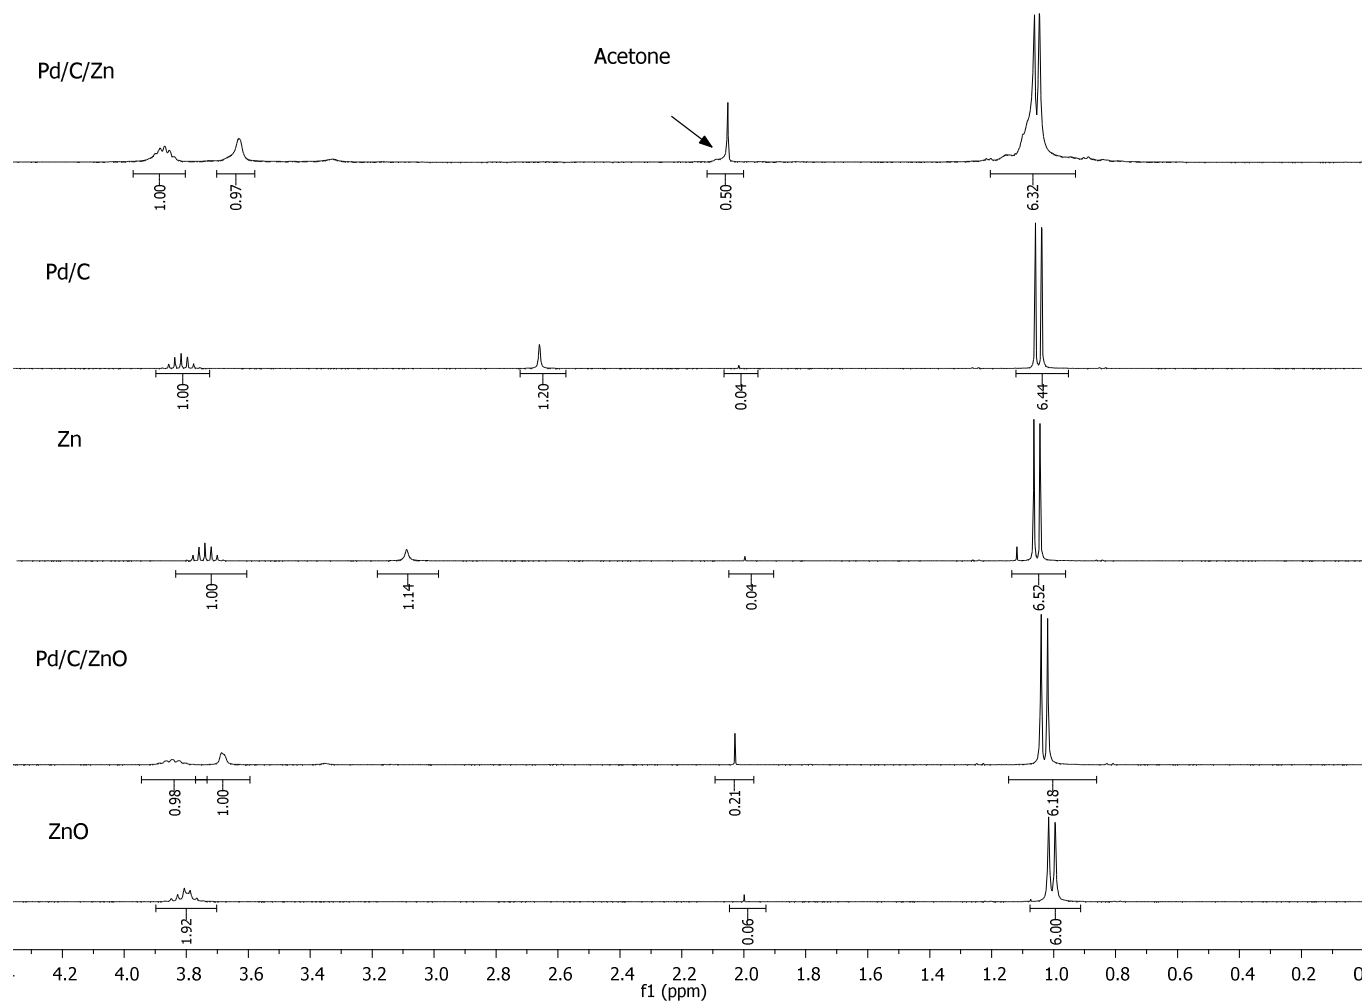

<sup>1</sup>H NMR spectra in CDCl<sub>3</sub> of the resulting mixture isopropanol/acetone after heating isopropanol at 150°C during 24 h in the presence of 0.76 mmol of quinoline and the metals indicated for each case.

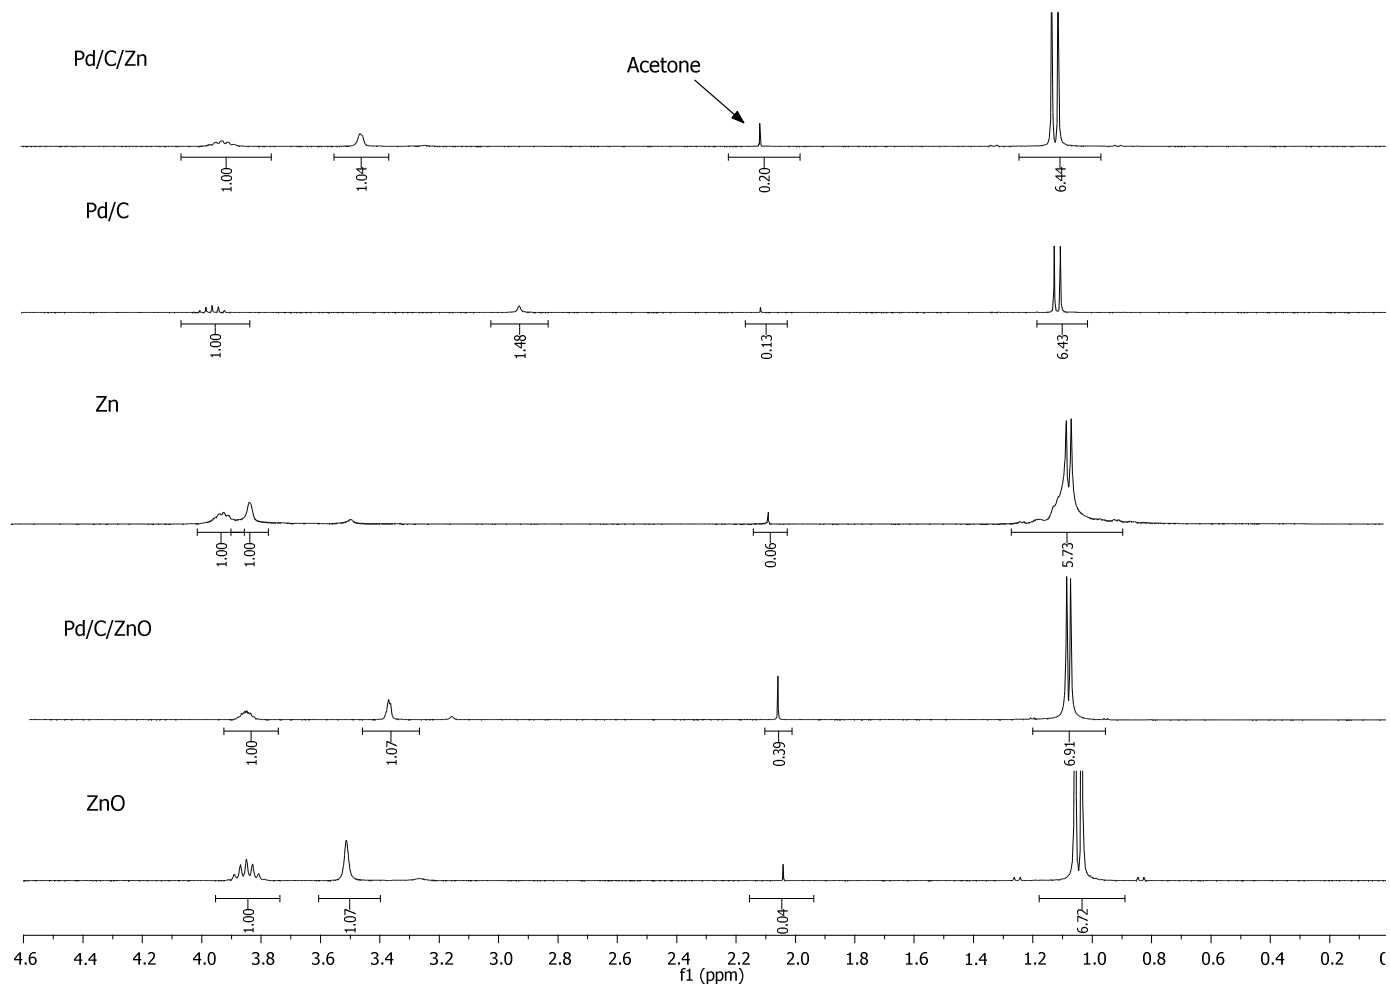

<sup>1</sup>H NMR spectra in CDCl<sub>3</sub> of the resulting mixture isopropanol/acetone after heating isopropanol at 150°C during 24 h, in absence of quinoline, and the metals indicated for each case.

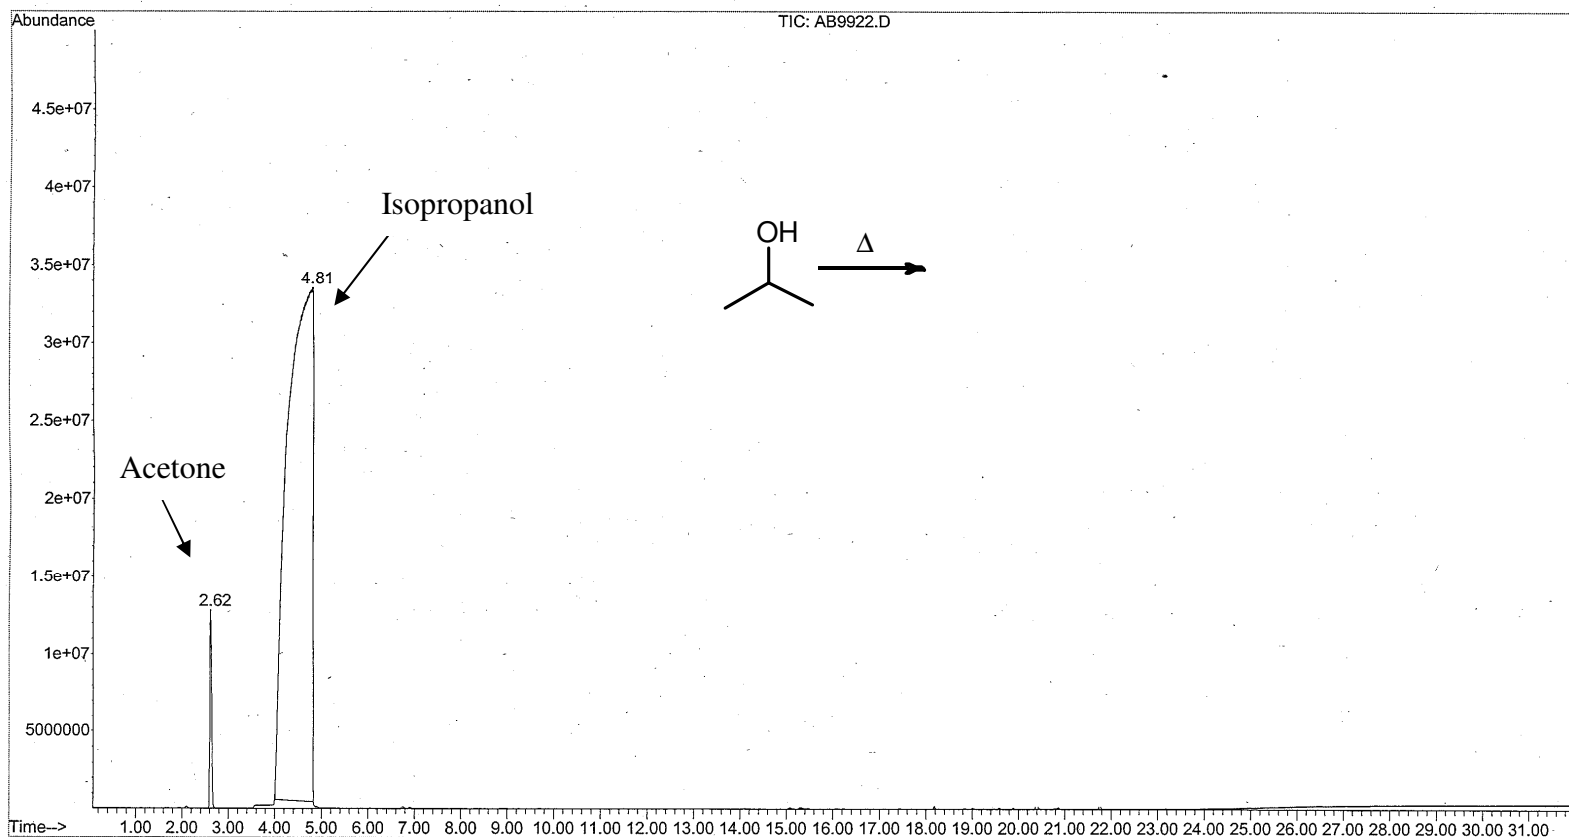

Gas chromatogram of the resulting mixture isopropanol/acetone after heating isopropanol at 150°C during 24 h.



Pd/C/Zn

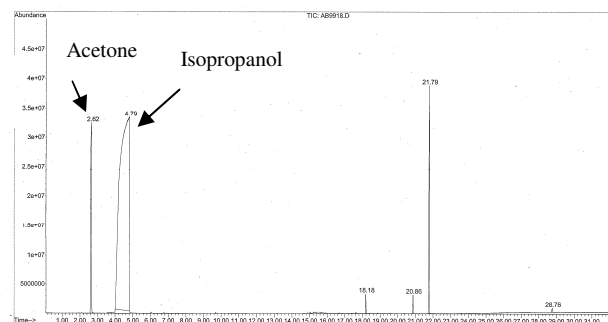

Zn

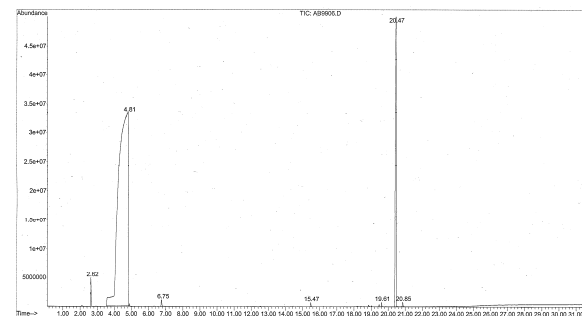

Pd/C

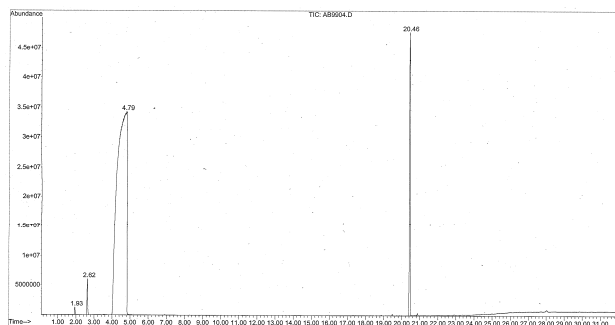

Pd/C/ZnO

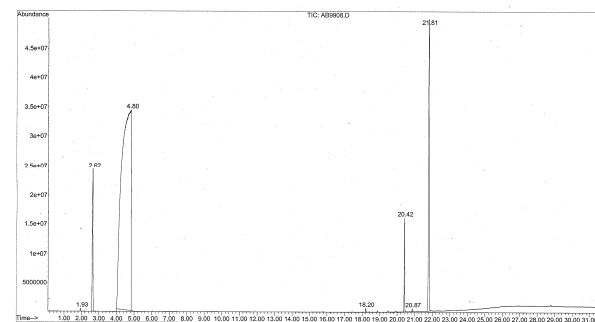

ZnO

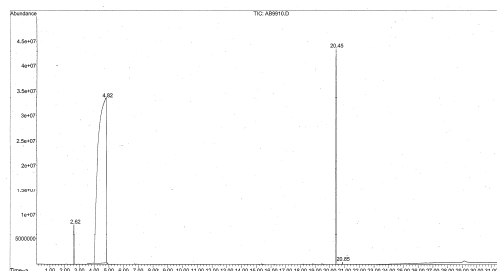

Gas chromatograms of the resulting reaction mixtures of after heating isopropanol at 150°C during 24 h in the presence of 0.76 mmol of quinoline and the metals indicated for each case.

Pd/C/Zn

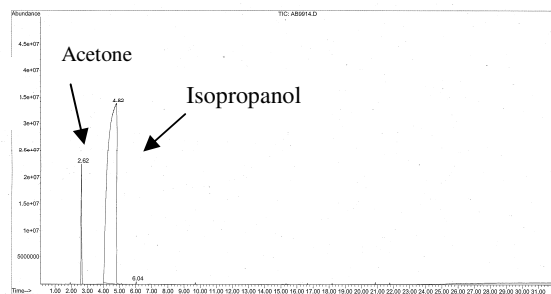

Zn

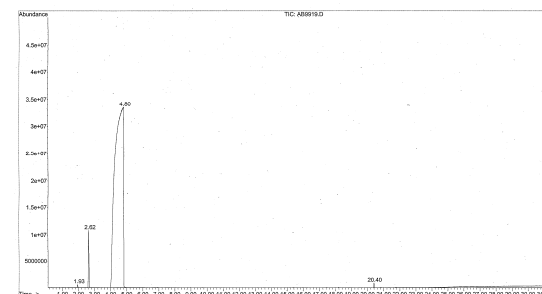

Pd/C

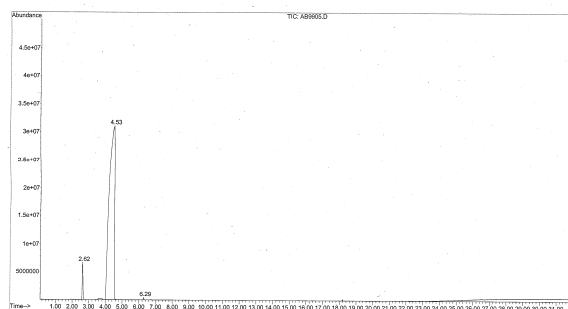

Pd/C/ZnO

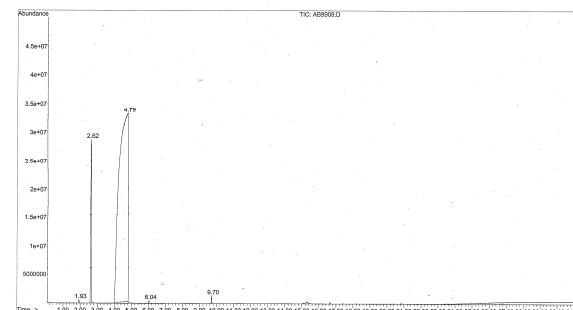

ZnO

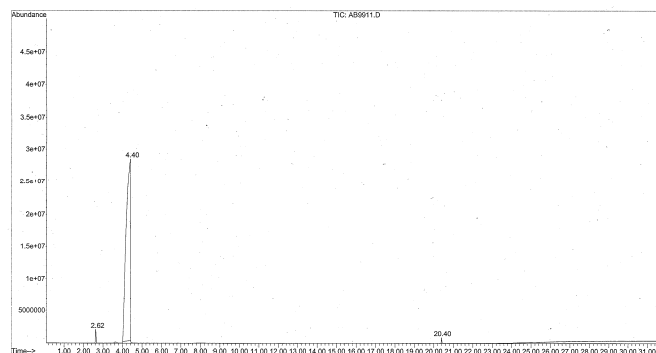

Gas chromatograms of the resulting mixtures isopropanol/acetone after heating isopropanol at 150°C during 24 h, in absence of quinoline, and the metals indicated for each case.

### 5. Spectra of 2-propanol-2-d<sub>1</sub> and 2-propan(ol-d) experiences.

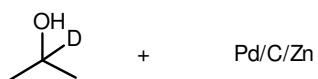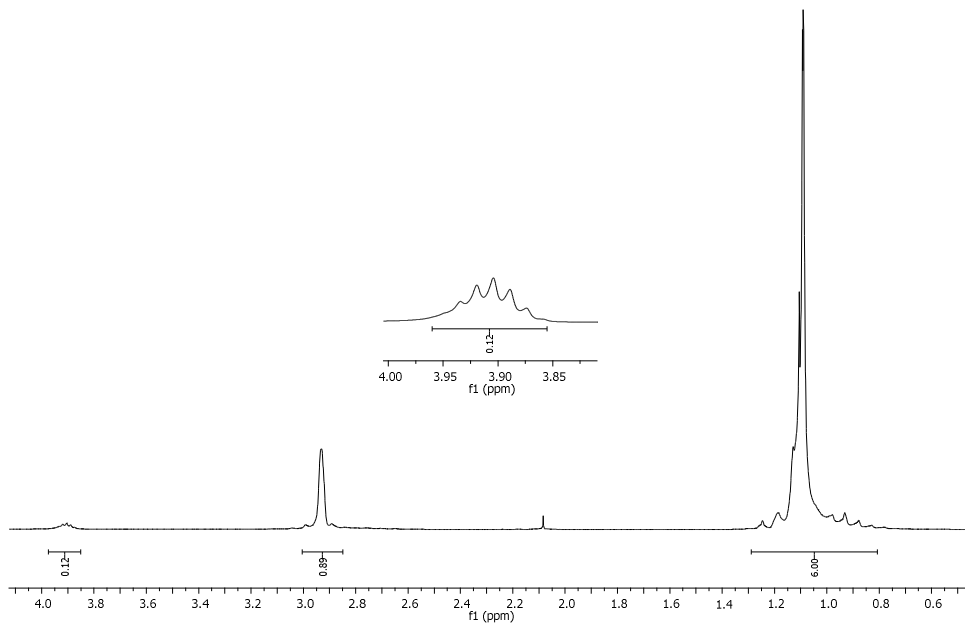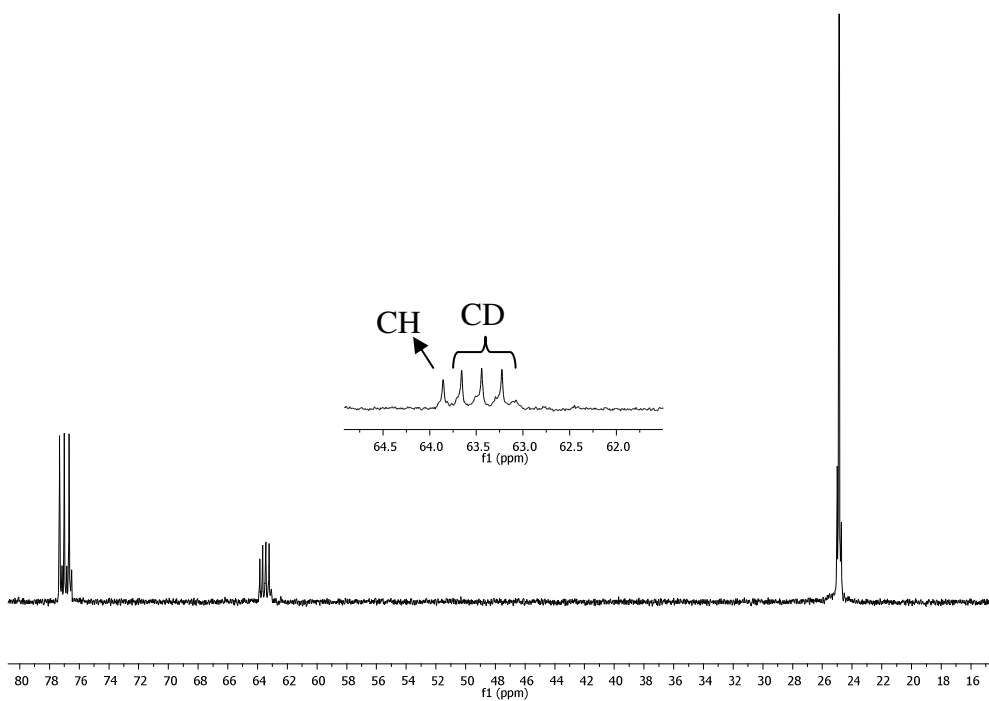

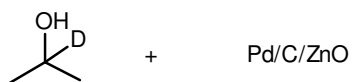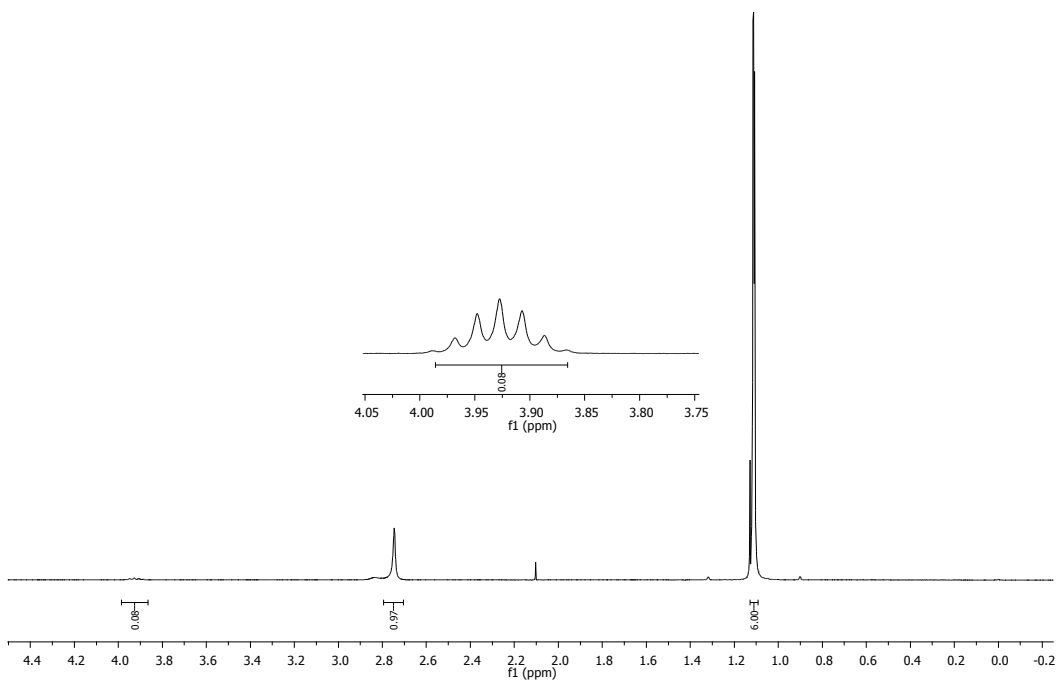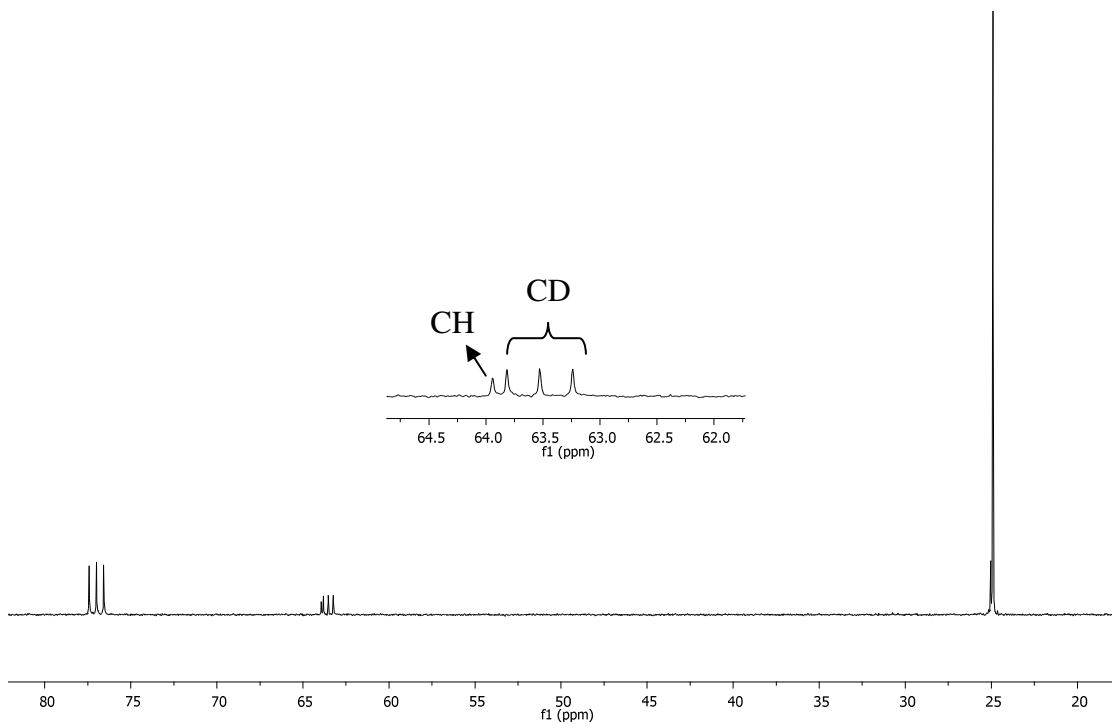

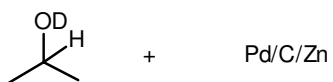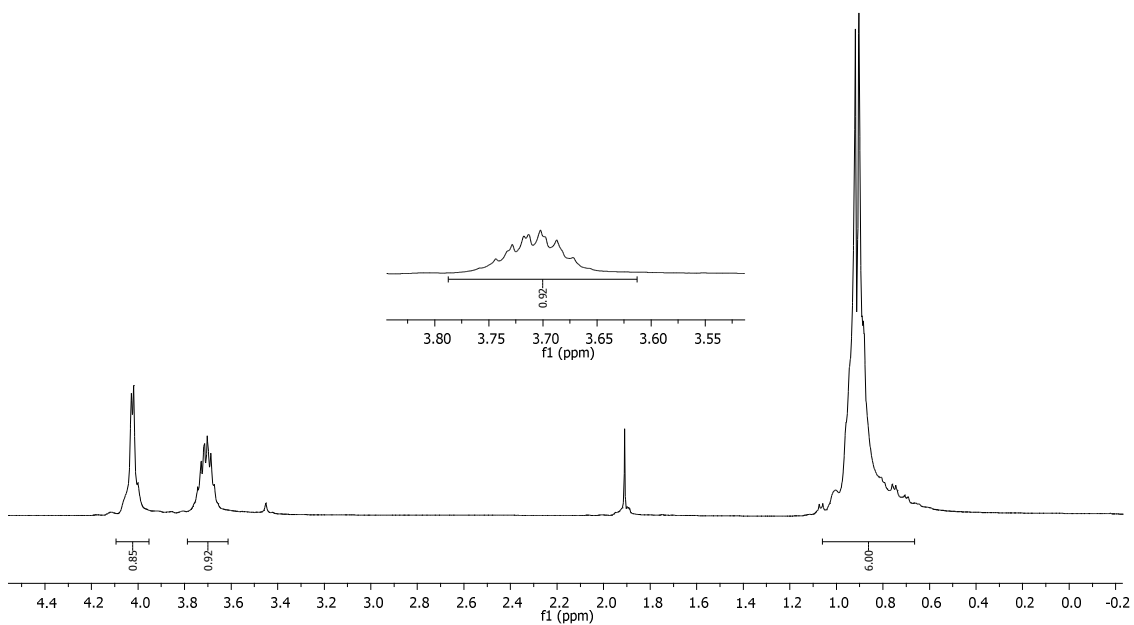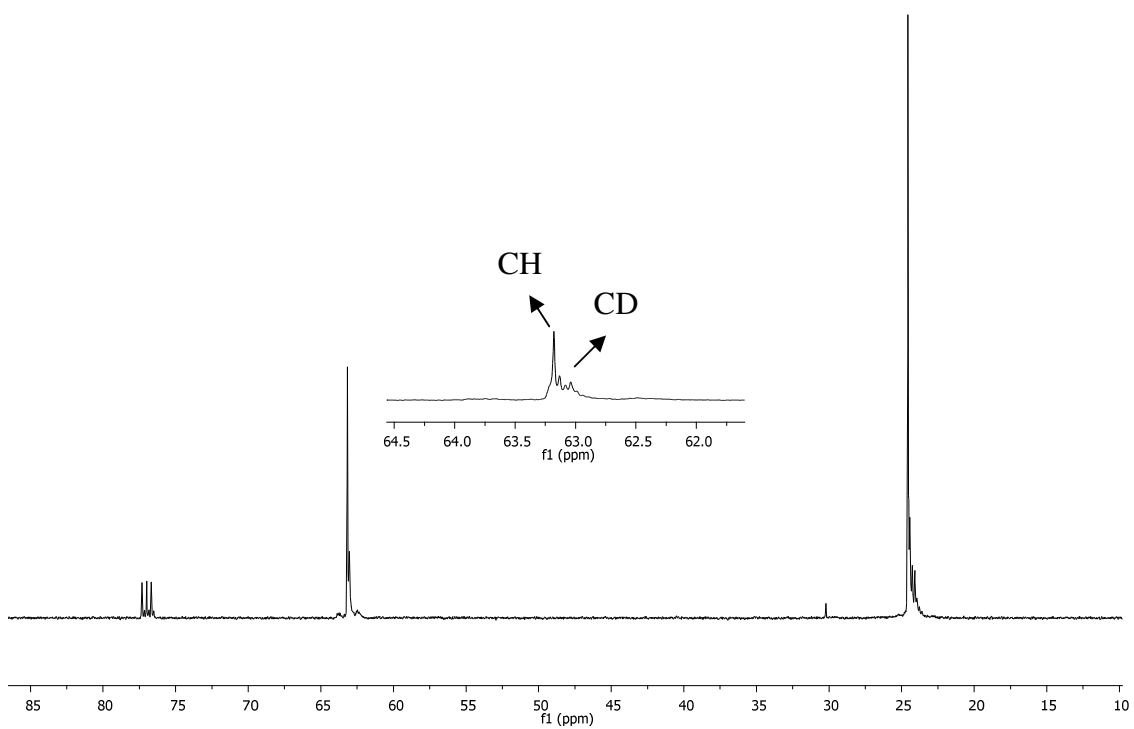

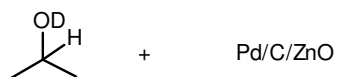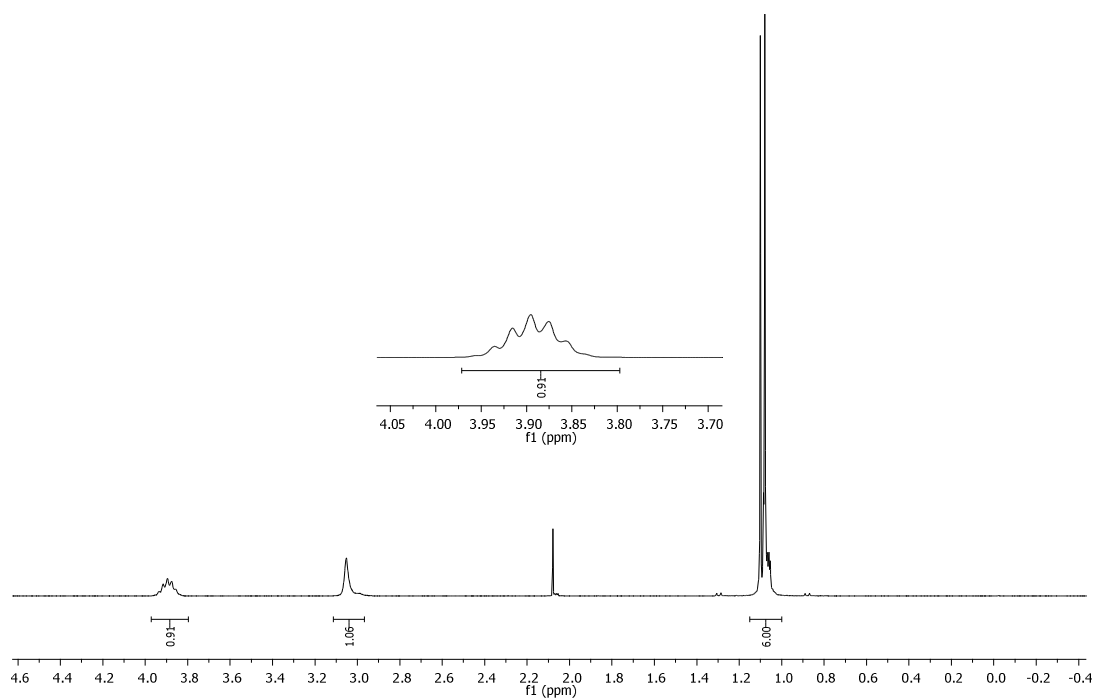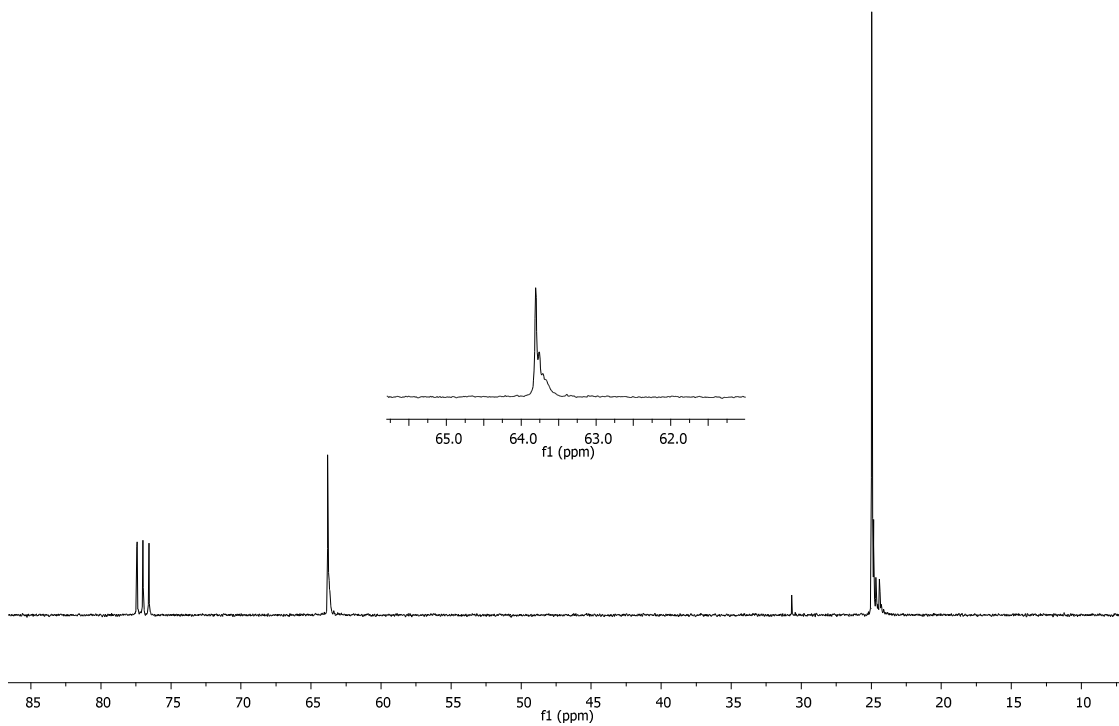

## 6. References

1. R. Omar-Amrani, A. Thomas, E. Brenner, R. I. Schneider and Y. Fort, *Org. Lett.*, 2003, **5**, 2311.
2. C. L. Shaffer, M. D. Morton and R. P. Hanzlik, *J. Am. Chem. Soc.*, 2001, **123**, 8502.
3. K. Y. Koltunov, G. K. S. Prakash, G. Rasul and G. A. Olah, *J. Org. Chem.*, 2002, **67**, 4330.
4. J. Horn, H. Y. Li, S. P. Marsden, A. Nelson, R. J. Shearer, A. J. Campbell, D. House and G. G. Weingarten, *Tetrahedron*, 2009, **65**, 9002.
5. G. Verniest, X. Wang, N. D. Kimpe and A. Padwa, *J. Org. Chem.*, 2009, **75**, 424.
6. H. Zhou, Z. Li, Z. Wang, T. Wang, L. Xu, Y. He, Q.-H. Fan, J. Pan, L. Gu and A. S. C. Chan, *Angew. Chem. Int. Ed.*, 2008, **47**, 8464.
7. S. Murahashi, Y. Imada and Y. Hirai, *Bull. Chem. Soc. Jpn.*, 1989, **62**, 2968.
8. C. Perrio-Huard, C. Aubert and M.-C. Lasne, *J. Chem. Soc Perkin Trans. 1*, 2000, 311.
9. I. Kondolff, H. Doucet and M. Santelli, *Organometallics*, 2006, **25**, 5219.
10. Z. Z. Shi, C. Zhang, S. Li, D. L. Pan, S. T. Ding, Y. X. Cui and N. Jiao, *Angew. Chem. Int. Ed.*, 2009, **48**, 4572.
